# Supplementary material for: Labdane-Type Diterpenoids from Streptomyces griseorubens and Their Antimicrobial and Cytotoxic Activities
Source: MDPI journal article supplement (doi:10.3390/ijms25063311), 2024-03-14
Supplement: s1 [file s1]

# Labdane-Type Diterpenoids from *Streptomyces griseorubens* and Their Antimicrobial and Cytotoxic Activities

Chang-Su Heo <sup>1,2</sup>, Jong Soon Kang <sup>3</sup>, Jeong-Wook Yang <sup>3</sup>, Min Ah Lee<sup>1,4</sup>, Hwa-Sun Lee<sup>1,4</sup> and Hee Jae Shin <sup>1,2,\*</sup>

## Contents

|                                                                                                                                                                  |    |
|------------------------------------------------------------------------------------------------------------------------------------------------------------------|----|
| <b>Figure S1.</b> Structures of <b>1-6</b> isolated from <i>Streptomyces griseorubens</i> 2210JJ-087. ....                                                       | 4  |
| <b>Figure S2.</b> HRESIMS data of <b>1</b> . ....                                                                                                                | 5  |
| <b>Figure S3.</b> <sup>1</sup> H NMR spectrum of <b>1</b> (CD <sub>3</sub> OD). ....                                                                             | 6  |
| <b>Figure S4.</b> <sup>13</sup> C NMR spectrum of <b>1</b> (CD <sub>3</sub> OD). ....                                                                            | 7  |
| <b>Figure S5.</b> HSQC spectrum of <b>1</b> (CD <sub>3</sub> OD). ....                                                                                           | 8  |
| <b>Figure S6.</b> <sup>1</sup> H- <sup>1</sup> H COSY spectrum of <b>1</b> (CD <sub>3</sub> OD). ....                                                            | 9  |
| <b>Figure S7.</b> HMBC spectrum of <b>1</b> (CD <sub>3</sub> OD). ....                                                                                           | 10 |
| <b>Figure S8.</b> NOESY spectrum of <b>1</b> (CD <sub>3</sub> OD). ....                                                                                          | 11 |
| <b>Figure S9.</b> HSQC spectrum of ( <i>S</i> )-di-MTPA esters of <b>1</b> ( <b>1a</b> ) (CD <sub>3</sub> OD). ....                                              | 12 |
| <b>Figure S10.</b> <sup>1</sup> H- <sup>1</sup> H COSY spectrum of ( <i>S</i> )-di-MTPA esters of <b>1</b> ( <b>1a</b> ) (CD <sub>3</sub> OD). ....              | 13 |
| <b>Figure S11.</b> <sup>1</sup> H NMR spectrum of ( <i>S</i> )-di-MTPA esters of <b>1</b> ( <b>1a</b> ) (CD <sub>3</sub> OD). ....                               | 14 |
| <b>Figure S12.</b> HSQC spectrum of ( <i>R</i> )-di-MTPA esters of <b>1</b> ( <b>1b</b> ) (CD <sub>3</sub> OD). ....                                             | 15 |
| <b>Figure S13.</b> <sup>1</sup> H- <sup>1</sup> H COSY spectrum of ( <i>R</i> )-di-MTPA esters of <b>1</b> ( <b>1b</b> ) (CD <sub>3</sub> OD). ....              | 16 |
| <b>Figure S14.</b> <sup>1</sup> H NMR spectrum of ( <i>R</i> )-di-MTPA esters of <b>1</b> ( <b>1b</b> ) (CD <sub>3</sub> OD). ....                               | 17 |
| <b>Figure S15.</b> Summarized Δδ values (in ppm) = δ <sub>S</sub> - δ <sub>R</sub> obtained for ( <i>S</i> )- and ( <i>R</i> )-di-MPTA esters of <b>1</b> . .... | 18 |
| <b>Figure S16.</b> HRESIMS data of <b>2</b> . ....                                                                                                               | 19 |
| <b>Figure S17.</b> <sup>1</sup> H NMR spectrum of <b>2</b> (CD <sub>3</sub> OD). ....                                                                            | 20 |
| <b>Figure S18.</b> <sup>13</sup> C NMR spectrum of <b>2</b> (CD <sub>3</sub> OD). ....                                                                           | 21 |
| <b>Figure S19.</b> HSQC NMR spectrum of <b>2</b> (CD <sub>3</sub> OD). ....                                                                                      | 22 |
| <b>Figure S20.</b> <sup>1</sup> H- <sup>1</sup> H COSY NMR spectrum of <b>2</b> (CD <sub>3</sub> OD). ....                                                       | 23 |
| <b>Figure S21.</b> HMBC NMR spectrum of <b>2</b> (CD <sub>3</sub> OD). ....                                                                                      | 24 |
| <b>Figure S22.</b> NOESY NMR spectrum of <b>2</b> (CD <sub>3</sub> OD). ....                                                                                     | 25 |
| <b>Figure S23.</b> HSQC spectrum of ( <i>S</i> )-MTPA esters of <b>2</b> ( <b>2a</b> ) (CD <sub>3</sub> OD). ....                                                | 26 |
| <b>Figure S24.</b> <sup>1</sup> H- <sup>1</sup> H COSY spectrum of ( <i>S</i> )-MTPA esters of <b>2</b> ( <b>2a</b> ) (CD <sub>3</sub> OD). ....                 | 27 |
| <b>Figure S25.</b> <sup>1</sup> H NMR spectrum of ( <i>S</i> )-MTPA esters of <b>2</b> ( <b>2a</b> ) (CD <sub>3</sub> OD). ....                                  | 28 |
| <b>Figure S26.</b> HSQC spectrum of ( <i>R</i> )-MTPA esters of <b>2</b> ( <b>2b</b> ) (CD <sub>3</sub> OD). ....                                                | 29 |
| <b>Figure S27.</b> <sup>1</sup> H- <sup>1</sup> H COSY spectrum of ( <i>R</i> )-MTPA esters of <b>2</b> ( <b>2b</b> ) (CD <sub>3</sub> OD). ....                 | 30 |
| <b>Figure S28.</b> <sup>1</sup> H NMR spectrum of ( <i>R</i> )-MTPA esters of <b>2</b> ( <b>2b</b> ) (CD <sub>3</sub> OD). ....                                  | 31 |

|                                                                                                                                                                     |    |
|---------------------------------------------------------------------------------------------------------------------------------------------------------------------|----|
| <b>Figure S29.</b> Summarized $\Delta\delta$ values (in ppm) = $\delta_S - \delta_R$ obtained for ( <i>S</i> )- and ( <i>R</i> )-MPTA esters of <b>2</b> .<br>..... | 32 |
| <b>Figure S30.</b> HRESIMS data of <b>3</b> . ....                                                                                                                  | 33 |
| <b>Figure S31.</b> $^1\text{H}$ NMR spectrum of <b>3</b> ( $\text{CD}_3\text{OD}$ ). ....                                                                           | 34 |
| <b>Figure S32.</b> $^{13}\text{C}$ NMR spectrum of <b>3</b> ( $\text{CD}_3\text{OD}$ ). ....                                                                        | 35 |
| <b>Figure S33.</b> HSQC NMR spectrum of <b>3</b> ( $\text{CD}_3\text{OD}$ ). ....                                                                                   | 36 |
| <b>Figure S34.</b> $^1\text{H}$ - $^1\text{H}$ COSY NMR spectrum of <b>3</b> ( $\text{CD}_3\text{OD}$ ). ....                                                       | 37 |
| <b>Figure S35.</b> HMBC NMR spectrum of <b>3</b> ( $\text{CD}_3\text{OD}$ ). ....                                                                                   | 38 |
| <b>Figure S36.</b> 1D selective NOESY data of <b>3</b> (irradiated H-9) ( $\text{CD}_3\text{OD}$ ). ....                                                            | 39 |
| <b>Figure S37.</b> 1D selective NOESY data of <b>3</b> (irradiated H-14) ( $\text{CD}_3\text{OD}$ ). ....                                                           | 40 |
| <b>Figure S38.</b> HRESIMS data of <b>4</b> . ....                                                                                                                  | 40 |
| <b>Figure S39.</b> $^1\text{H}$ NMR spectrum of <b>4</b> ( $\text{CD}_3\text{OD}$ ). ....                                                                           | 42 |
| <b>Figure S40.</b> $^{13}\text{C}$ NMR spectrum of <b>4</b> ( $\text{CD}_3\text{OD}$ ). ....                                                                        | 42 |
| <b>Figure S41.</b> HSQC NMR spectrum of <b>4</b> ( $\text{CD}_3\text{OD}$ ). ....                                                                                   | 43 |
| <b>Figure S42.</b> $^1\text{H}$ - $^1\text{H}$ COSY NMR spectrum of <b>4</b> ( $\text{CD}_3\text{OD}$ ). ....                                                       | 44 |
| <b>Figure S43.</b> HMBC NMR spectrum of <b>4</b> ( $\text{CD}_3\text{OD}$ ). ....                                                                                   | 45 |
| <b>Figure S44.</b> NOESY NMR spectrum of <b>4</b> ( $\text{CD}_3\text{OD}$ ). ....                                                                                  | 47 |
| <b>Figure S45.</b> HRESIMS data of <b>5</b> . ....                                                                                                                  | 47 |
| <b>Figure S46.</b> $^1\text{H}$ NMR spectrum of <b>5</b> ( $\text{CD}_3\text{OD}$ ). ....                                                                           | 49 |
| <b>Figure S47.</b> $^{13}\text{C}$ NMR spectrum of <b>5</b> ( $\text{CD}_3\text{OD}$ ). ....                                                                        | 49 |
| <b>Figure S48.</b> HSQC NMR spectrum of <b>5</b> ( $\text{CD}_3\text{OD}$ ). ....                                                                                   | 50 |
| <b>Figure S49.</b> $^1\text{H}$ - $^1\text{H}$ COSY NMR spectrum of <b>5</b> ( $\text{CD}_3\text{OD}$ ). ....                                                       | 51 |
| <b>Figure S50.</b> HMBC NMR spectrum of <b>5</b> ( $\text{CD}_3\text{OD}$ ). ....                                                                                   | 52 |
| <b>Figure S51.</b> NOESY NMR spectrum of <b>5</b> ( $\text{CD}_3\text{OD}$ ). ....                                                                                  | 53 |
| <b>Figure S52.</b> LRESIMS data of <b>6</b> . ....                                                                                                                  | 54 |
| <b>Figure S53.</b> $^1\text{H}$ NMR spectrum of <b>6</b> ( $\text{CD}_3\text{OD}$ ). ....                                                                           | 55 |
| <b>Figure S54.</b> $^{13}\text{C}$ NMR spectrum of <b>6</b> ( $\text{CD}_3\text{OD}$ ). ....                                                                        | 56 |
| <b>Table S1.</b> Results of the cytotoxicity test of <b>1</b> , <b>2</b> , and <b>4</b> . ....                                                                      | 58 |

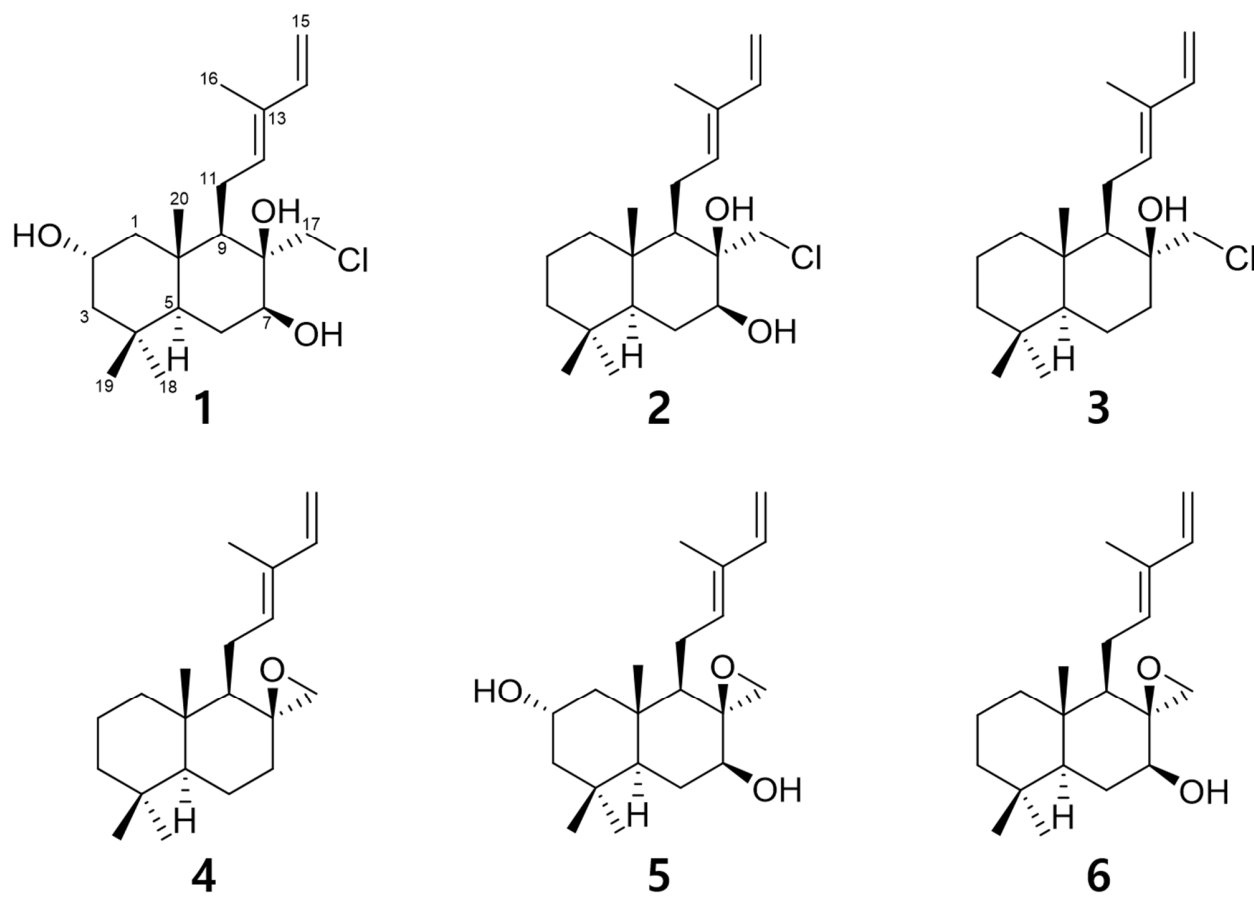

**Figure S1.** Structures of **1-6** isolated from *Streptomyces griseorubens* 2210JJ-087.

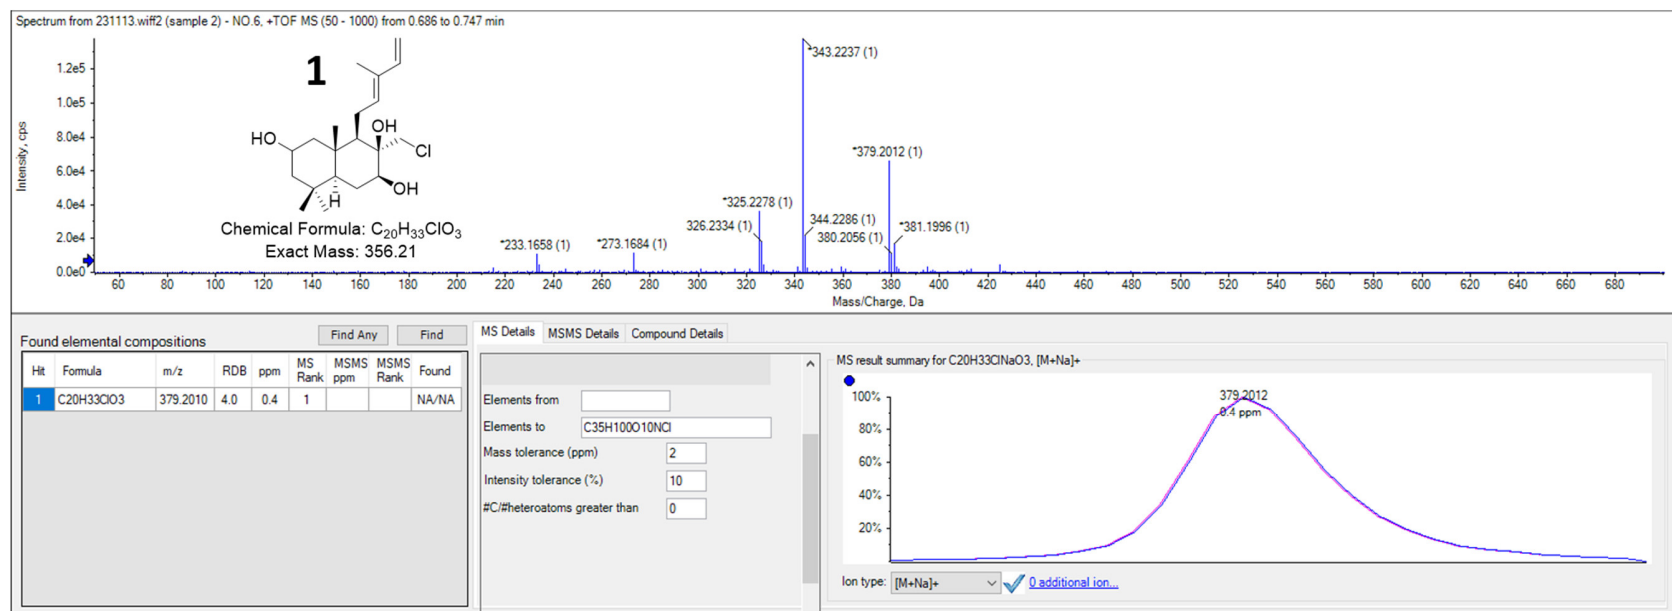

Figure S2. HRESIMS data of 1.

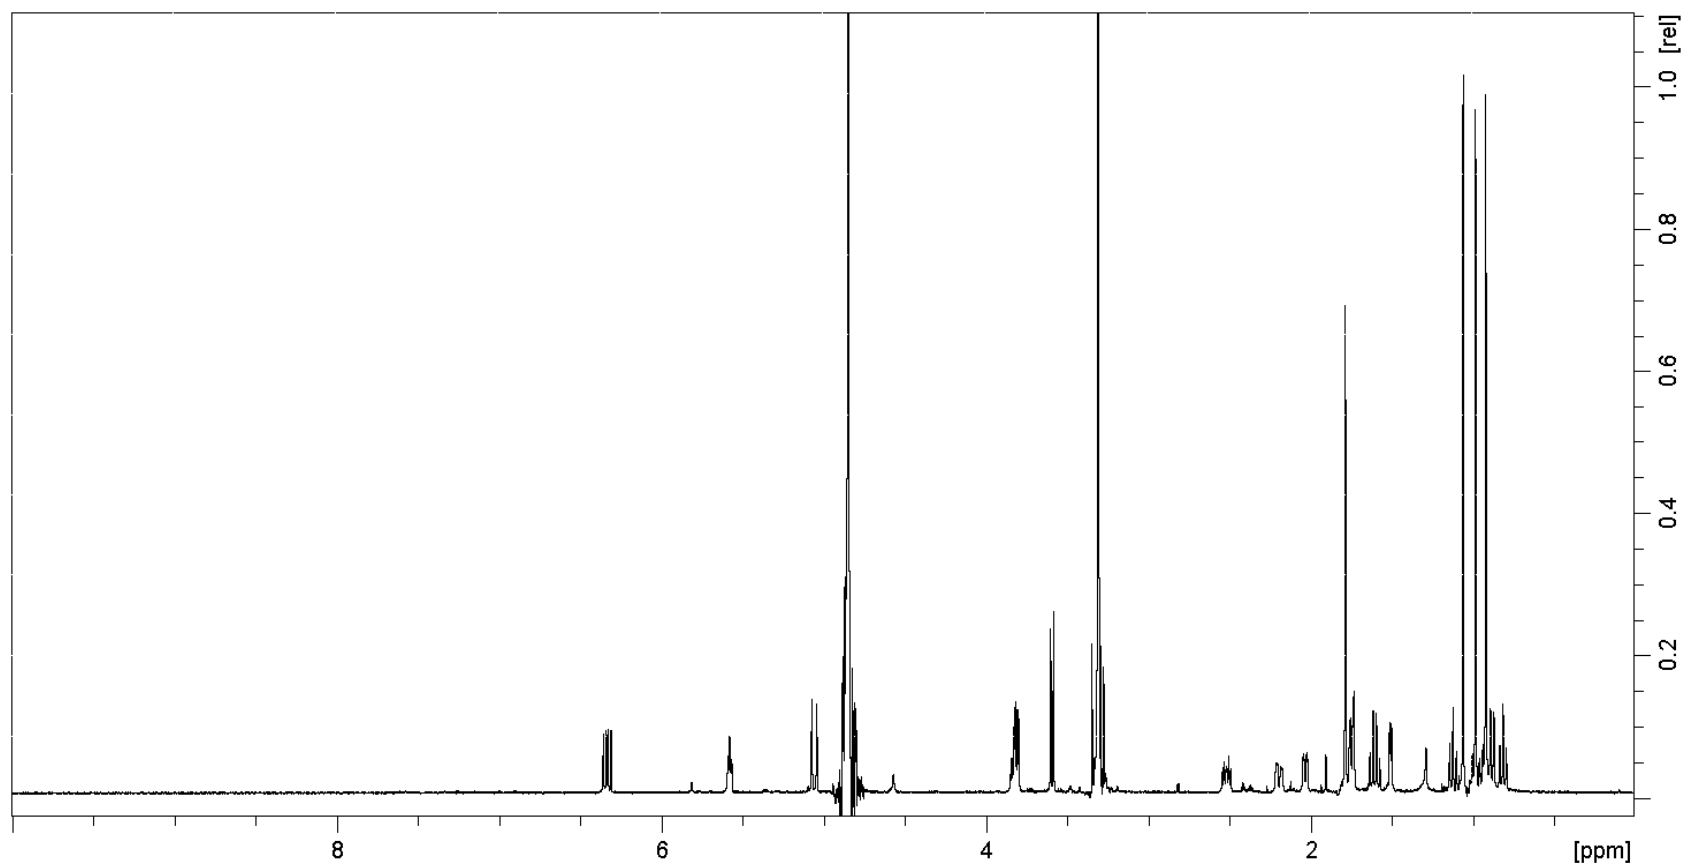

**Figure S3.**  $^1\text{H}$  NMR spectrum of **1** ( $\text{CD}_3\text{OD}$ ).

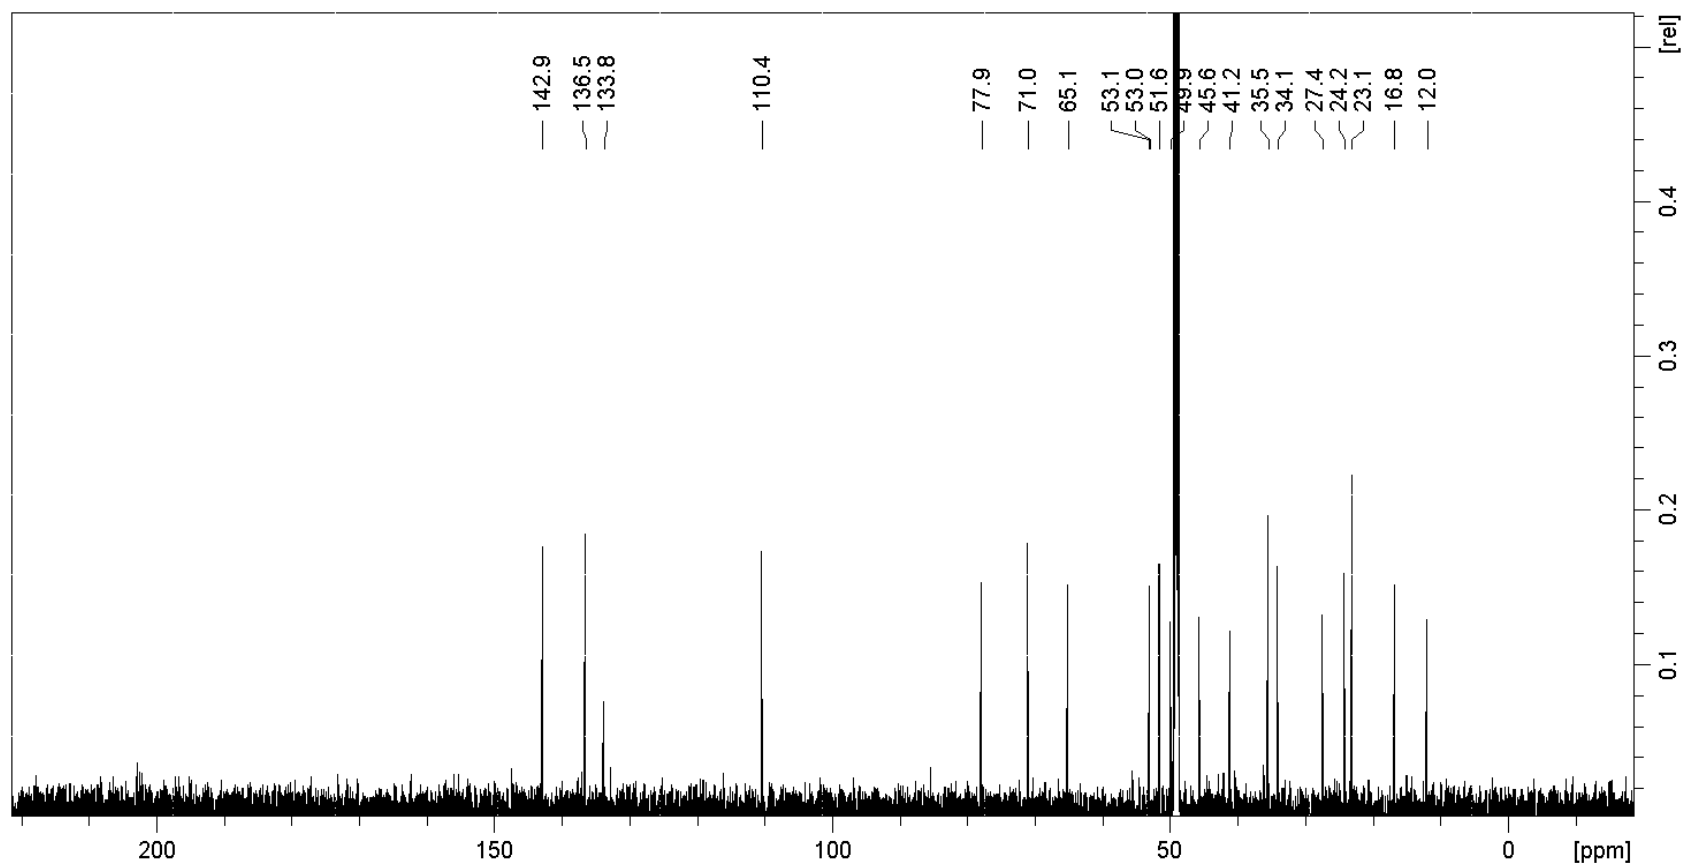

**Figure S4.** <sup>13</sup>C NMR spectrum of **1** (CD<sub>3</sub>OD).

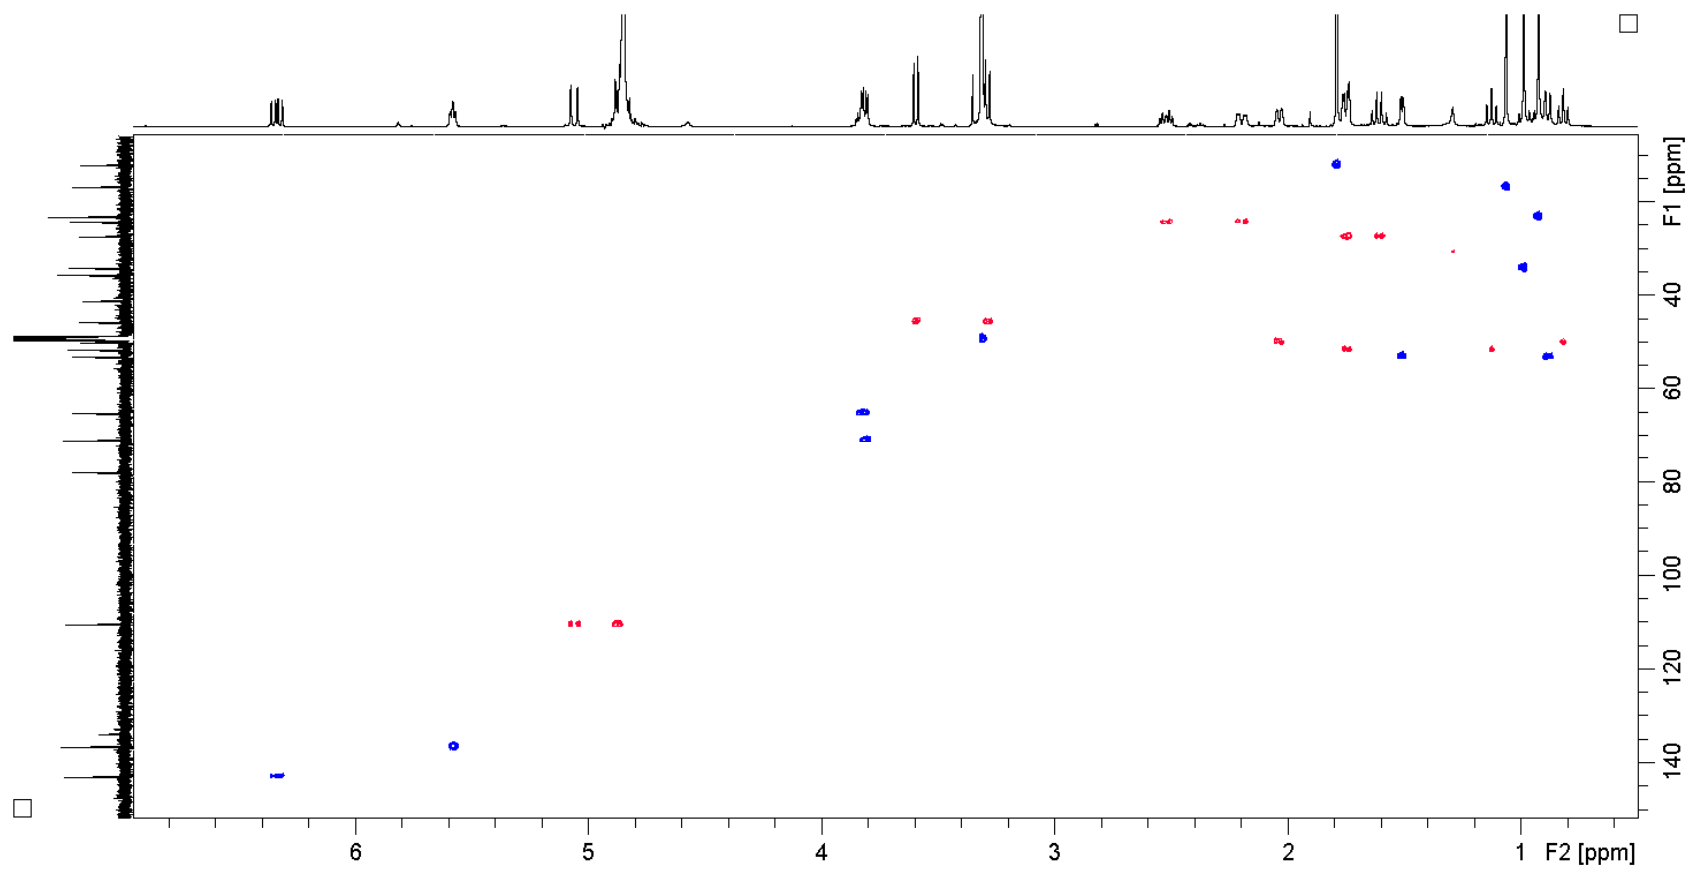

**Figure S5.** HSQC spectrum of **1** ( $\text{CD}_3\text{OD}$ ).



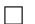

**Figure S6.**  $^1\text{H}$ - $^1\text{H}$  COSY spectrum of **1** ( $\text{CD}_3\text{OD}$ ).

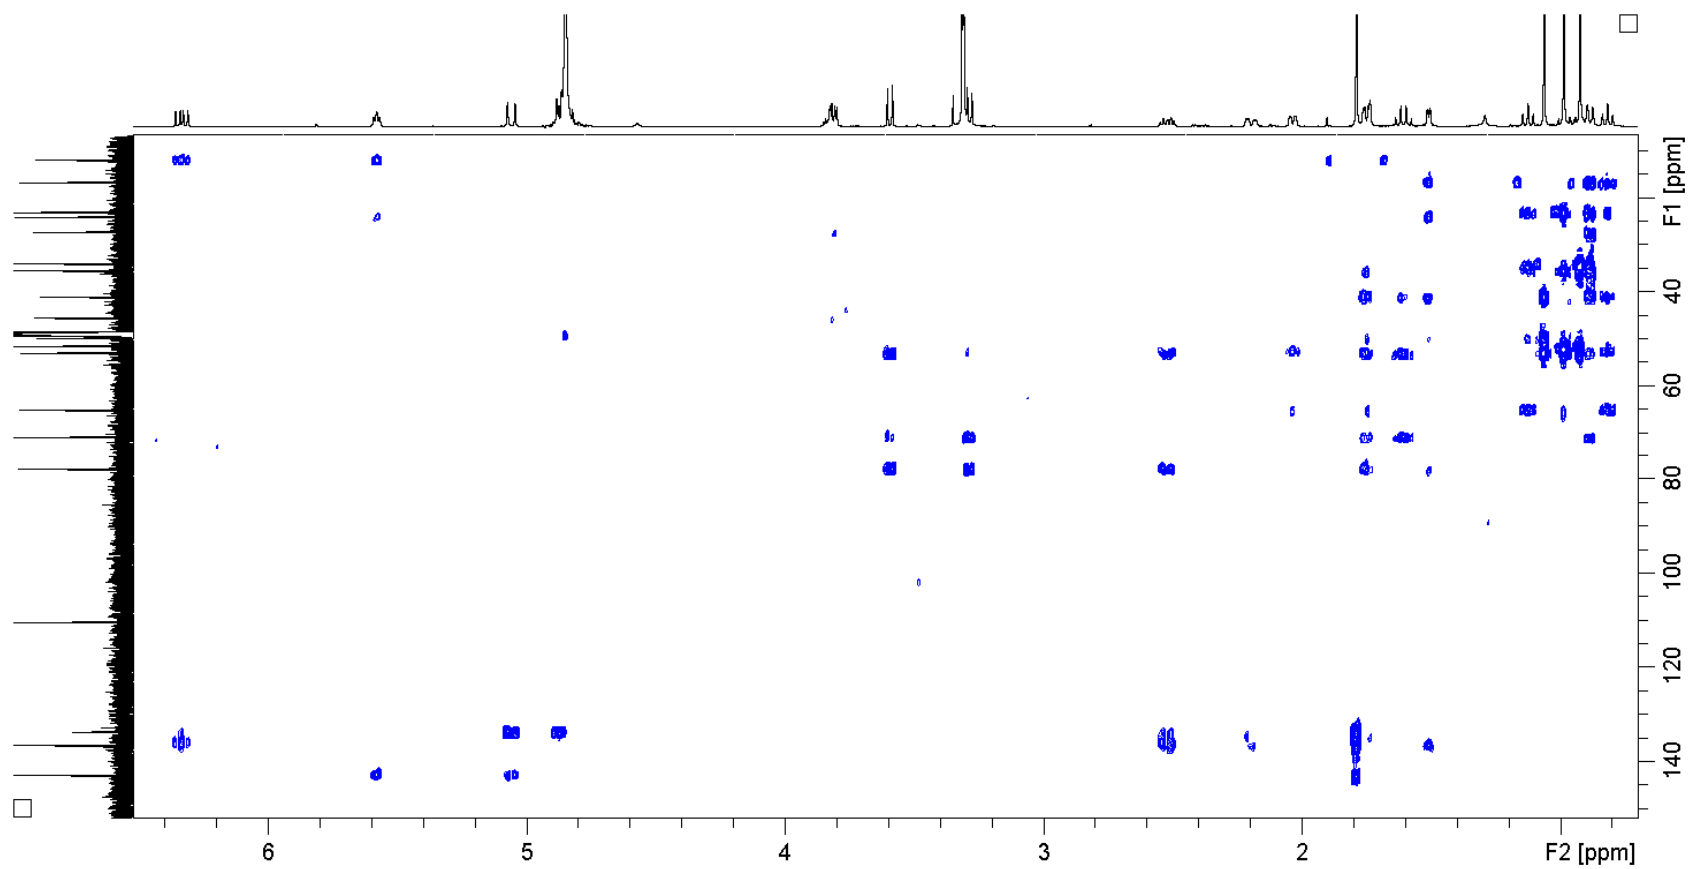

**Figure S7.** HMBC spectrum of **1** ( $\text{CD}_3\text{OD}$ ).

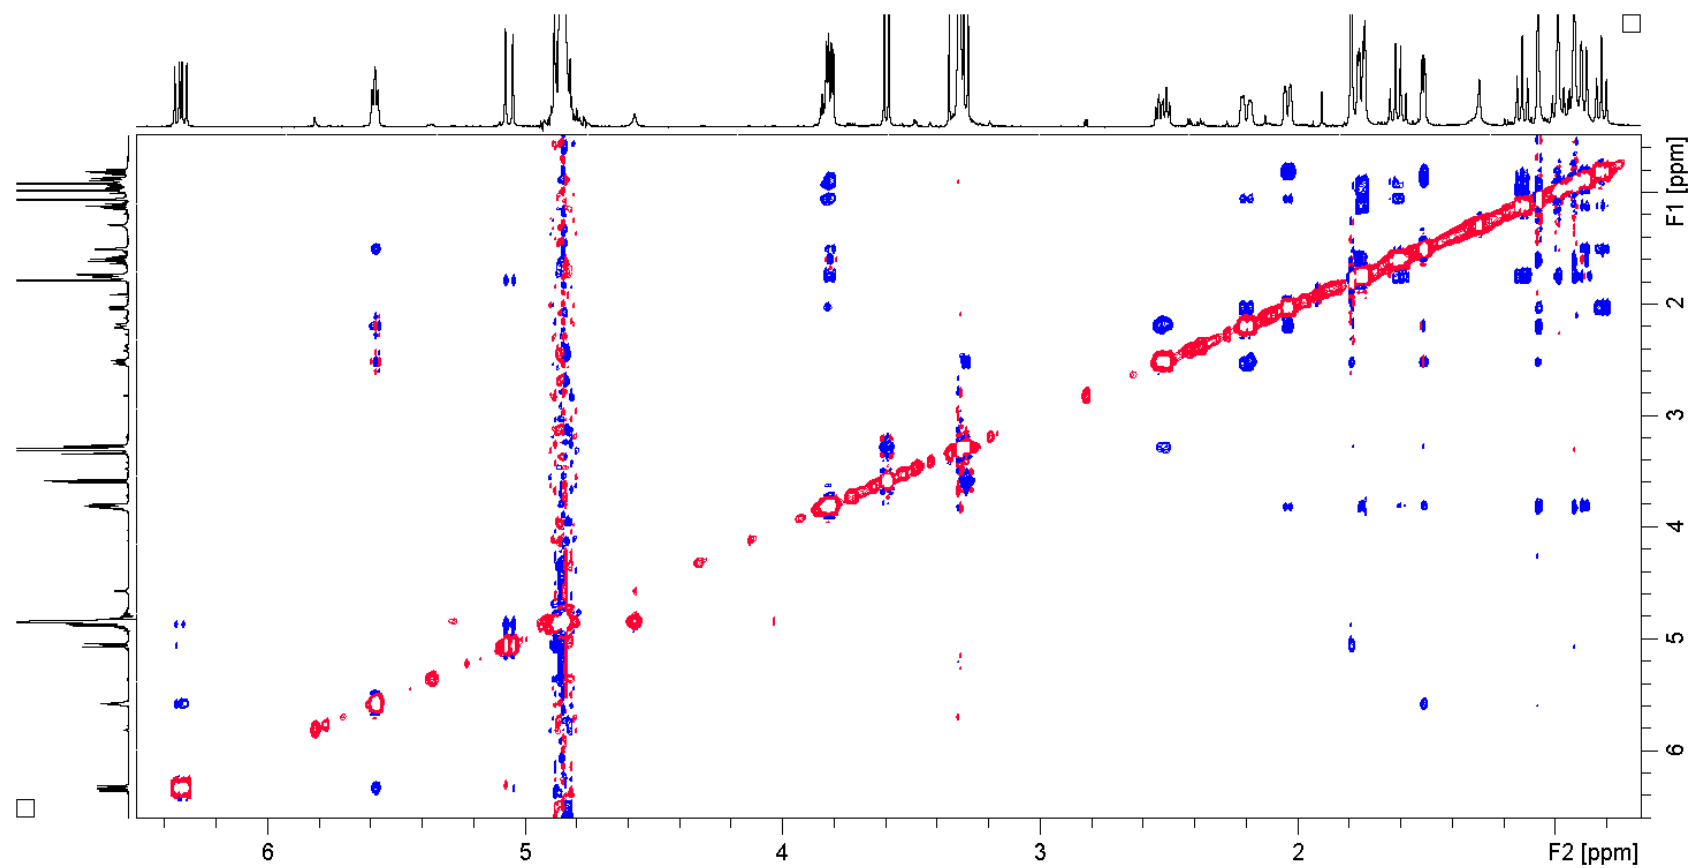

**Figure S8.** NOESY spectrum of **1** (CD<sub>3</sub>OD).

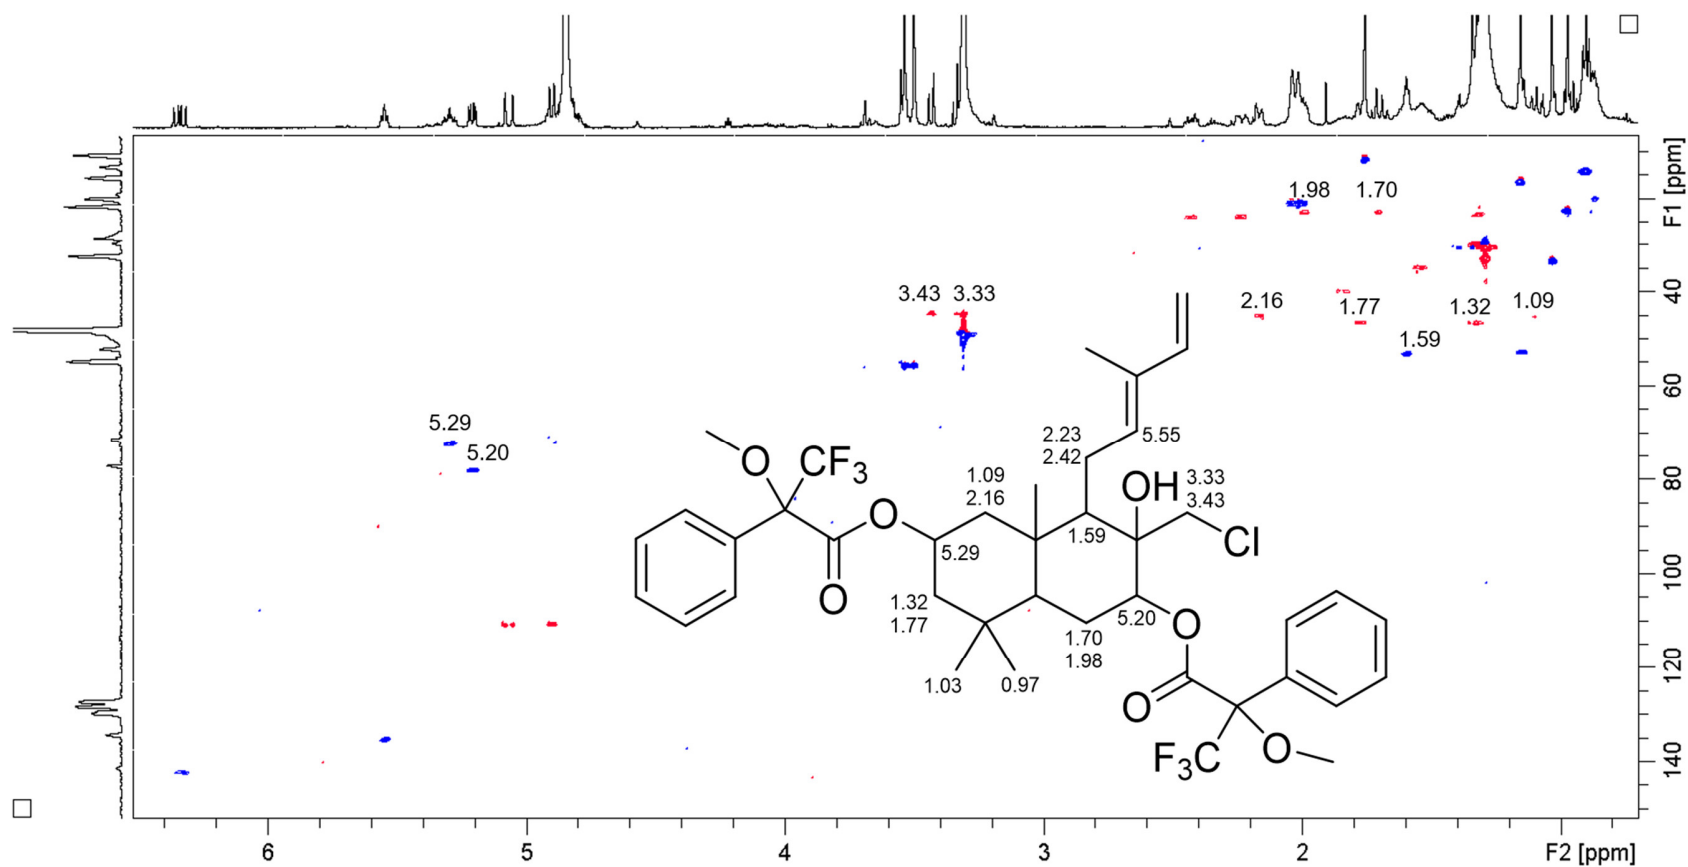

**Figure S9.** HSQC spectrum of (*S*)-di-MTPA esters of **1** (**1a**) (CD<sub>3</sub>OD).

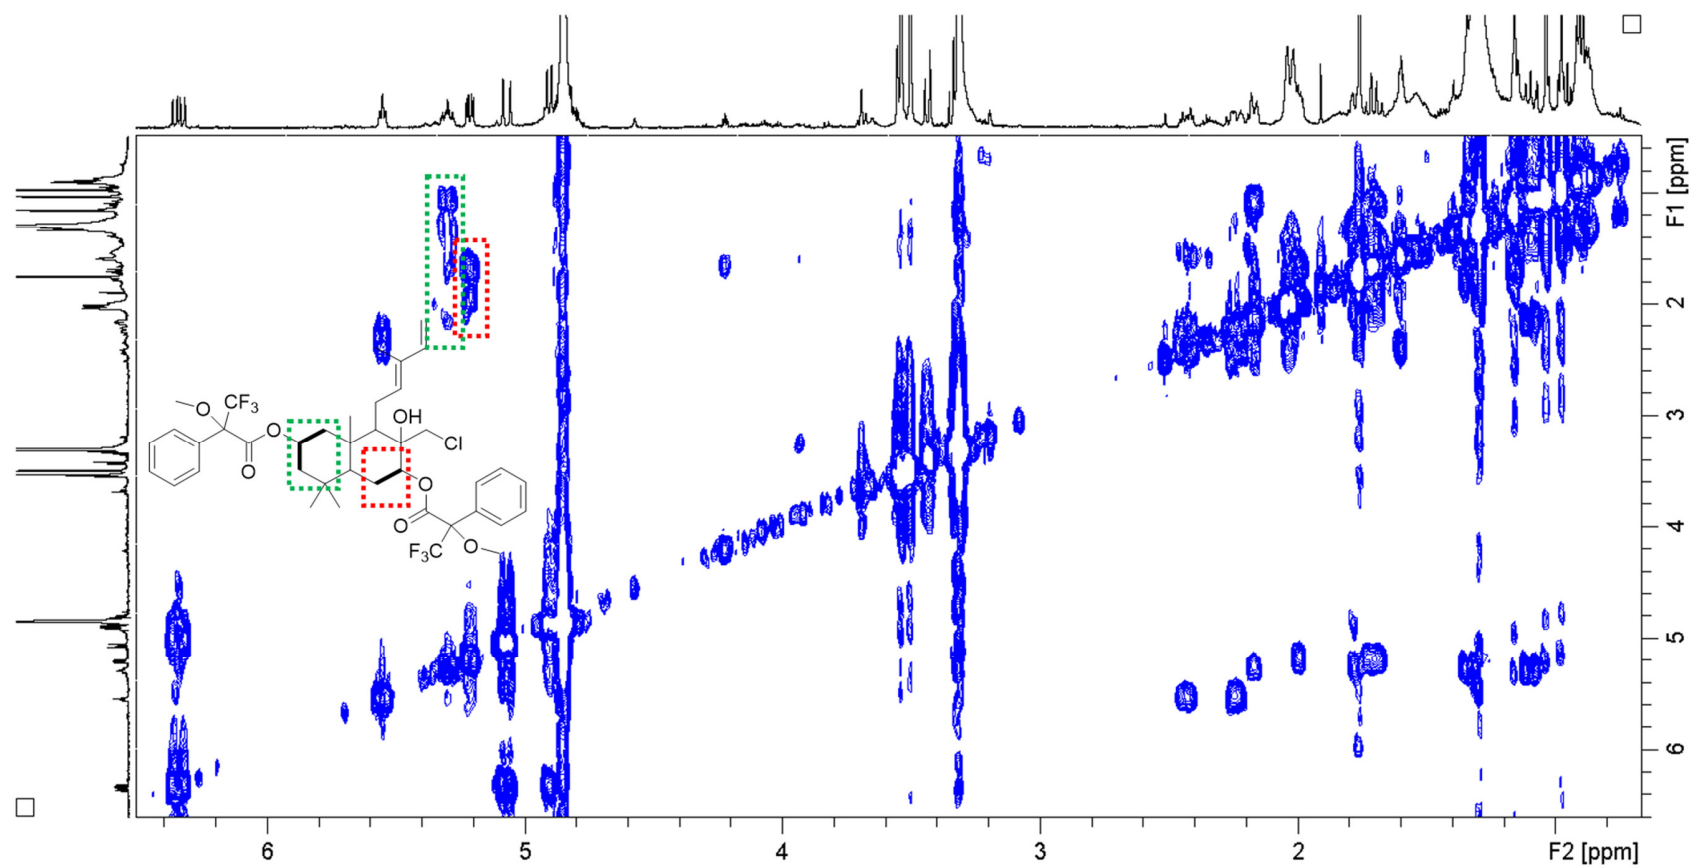

**Figure S10.**  $^1\text{H}$ - $^1\text{H}$  COSY spectrum of (S)-di-MTPA esters of **1** (**1a**) ( $\text{CD}_3\text{OD}$ ).

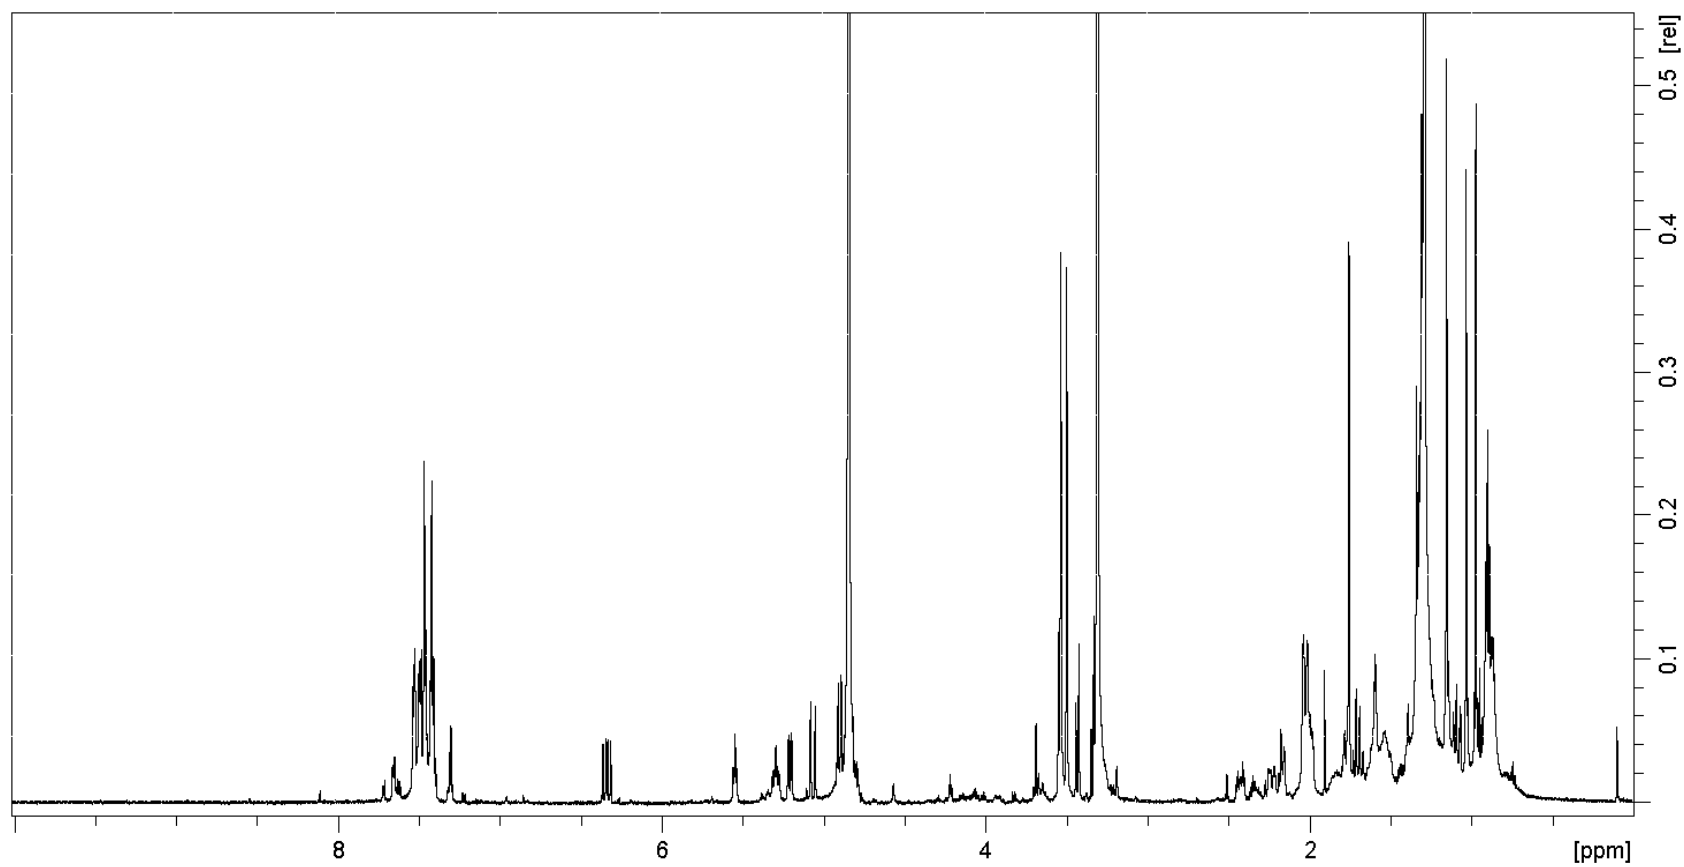

**Figure S11.**  $^1\text{H}$  NMR spectrum of (S)-di-MTPA esters of 1 (1a) ( $\text{CD}_3\text{OD}$ ).

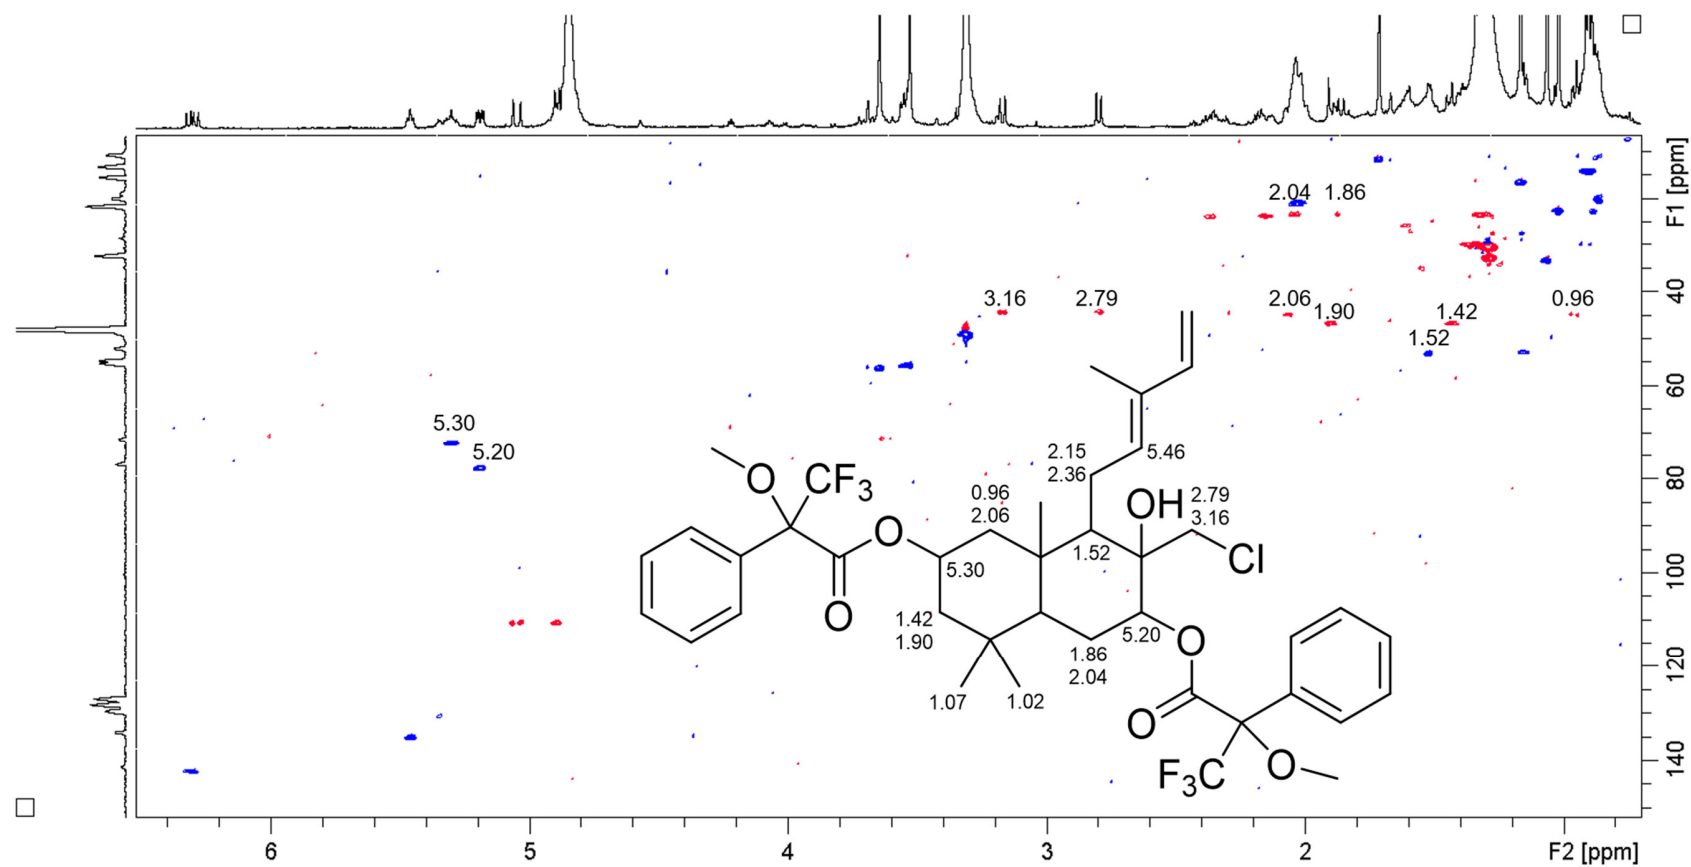

**Figure S12.** HSQC spectrum of (*R*)-di-MTPA esters of **1** (**1b**) ( $\text{CD}_3\text{OD}$ ).

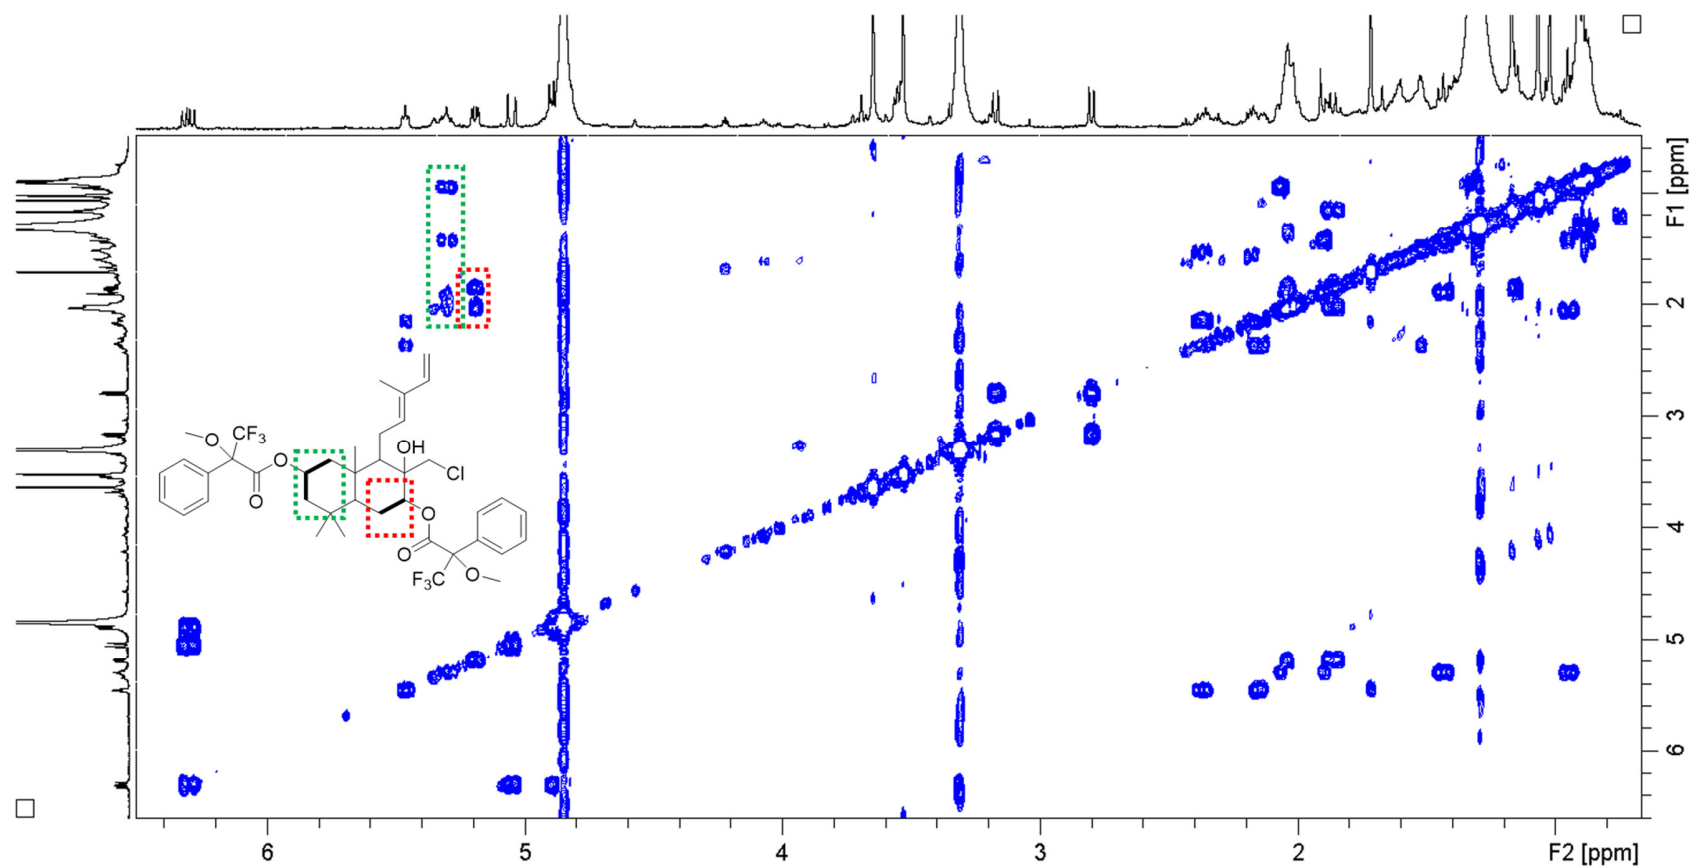

**Figure S13.**  $^1\text{H}$ - $^1\text{H}$  COSY spectrum of (*R*)-di-MTPA esters of **1** (**1b**) ( $\text{CD}_3\text{OD}$ ).



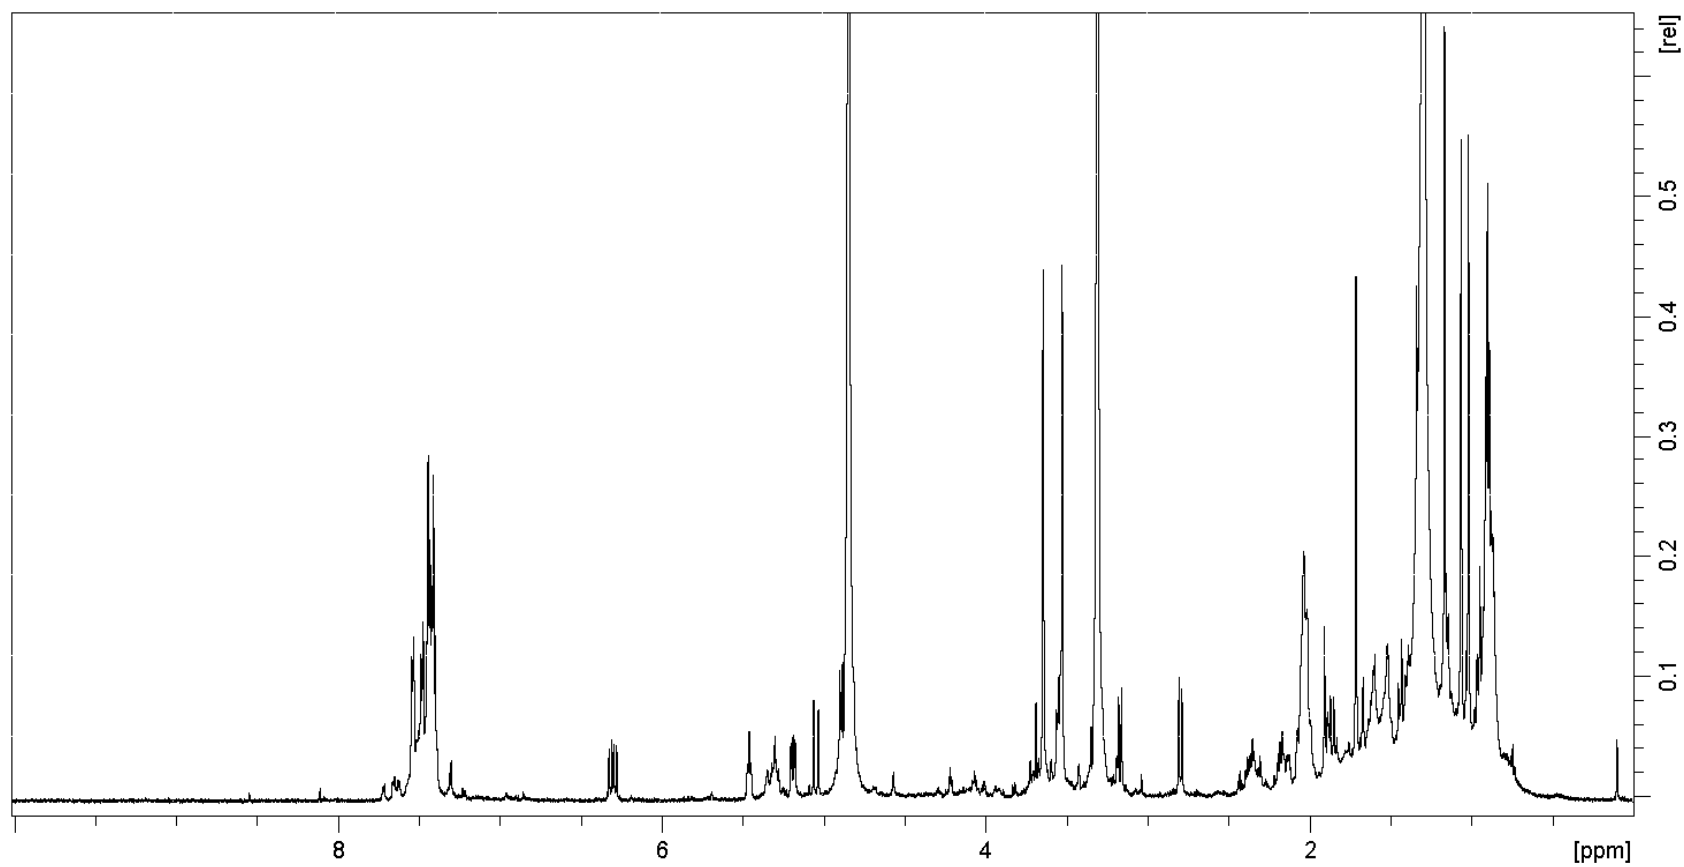

**Figure S14.**  $^1\text{H}$  NMR spectrum of (*R*)-di-MTPA esters of **1** (**1b**) ( $\text{CD}_3\text{OD}$ ).

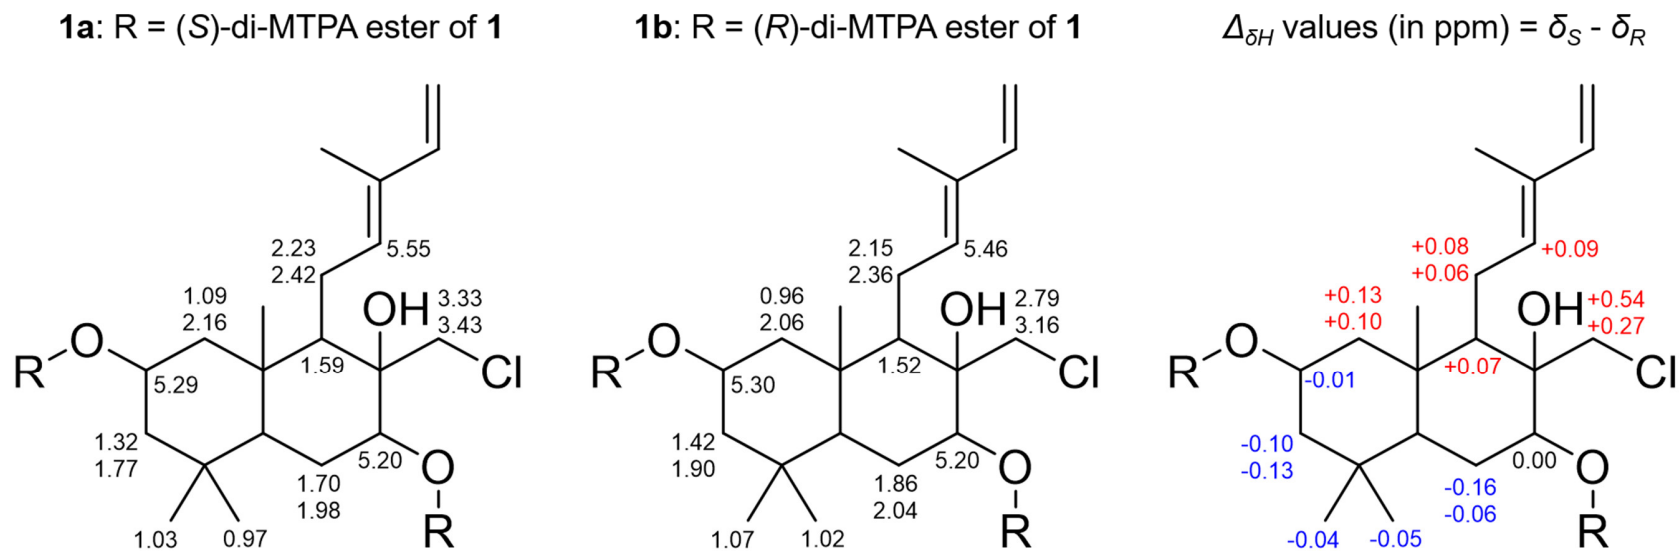

**Figure S15.** Summarized  $\Delta\delta$  values (in ppm) =  $\delta_S - \delta_R$  obtained for (*S*)- and (*R*)-di-MPTA esters of **1**.



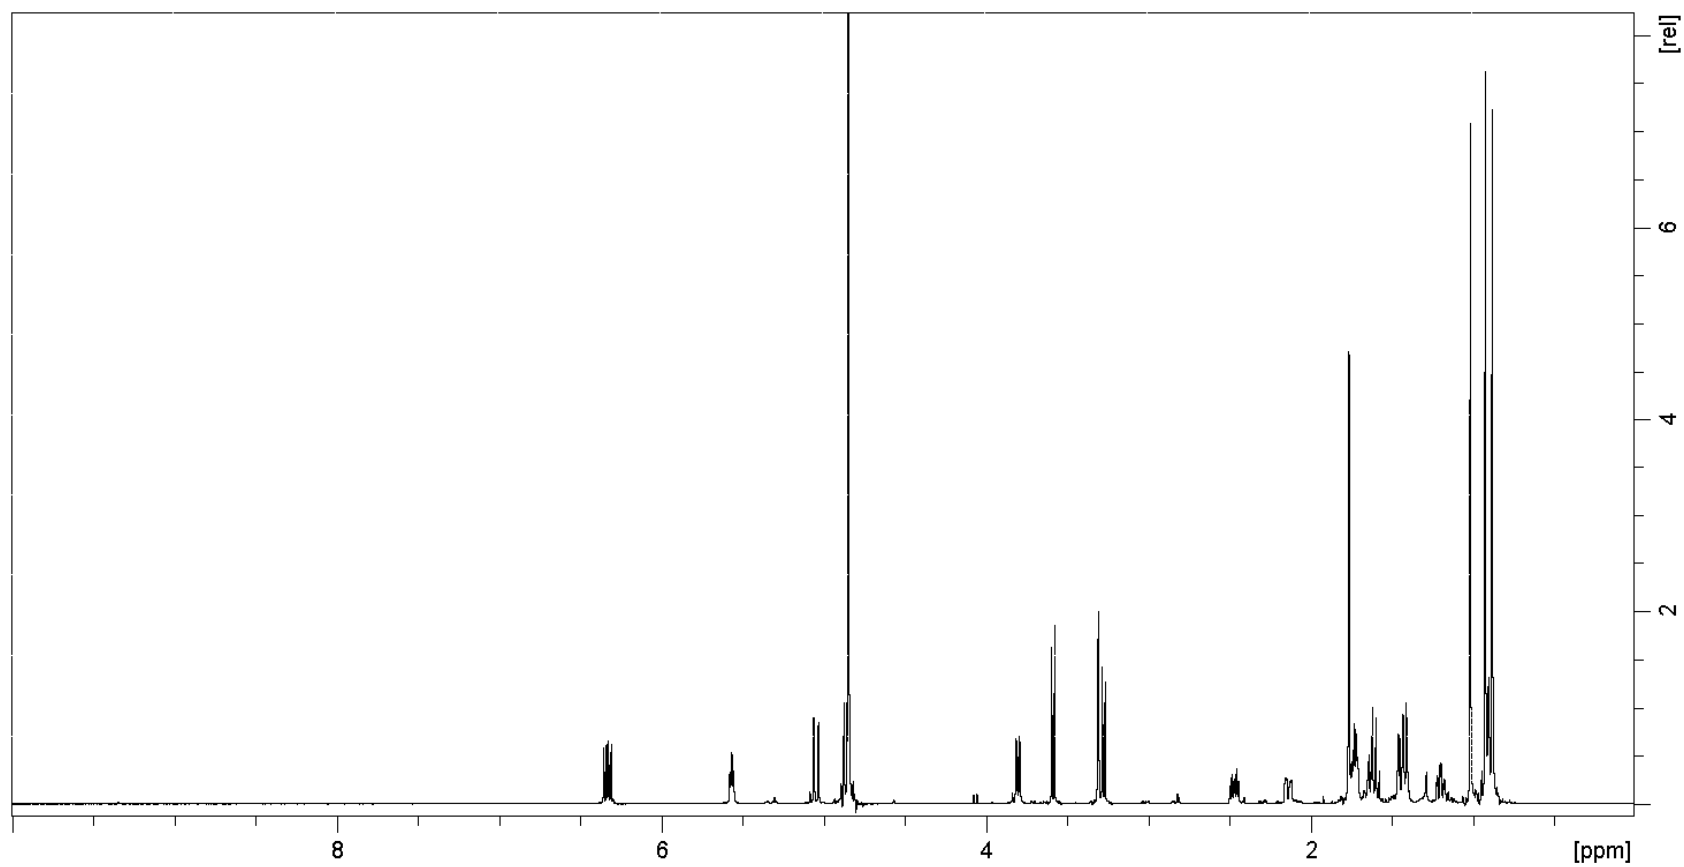

**Figure S17.**  $^1\text{H}$  NMR spectrum of **2** ( $\text{CD}_3\text{OD}$ ).

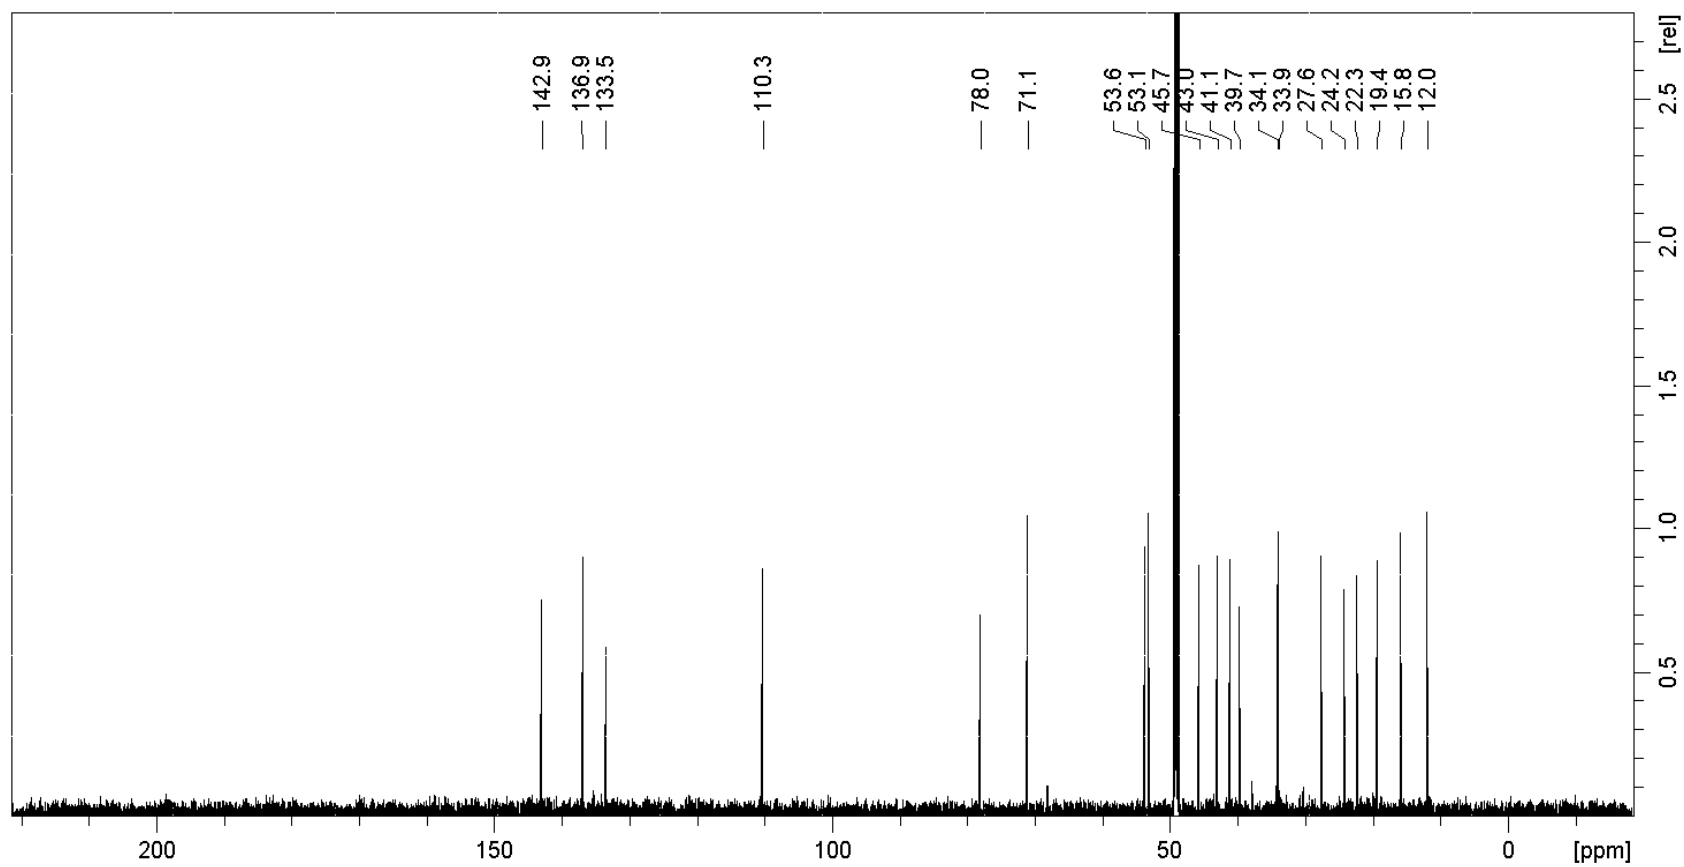

**Figure S18.** <sup>13</sup>C NMR spectrum of **2** (CD<sub>3</sub>OD).

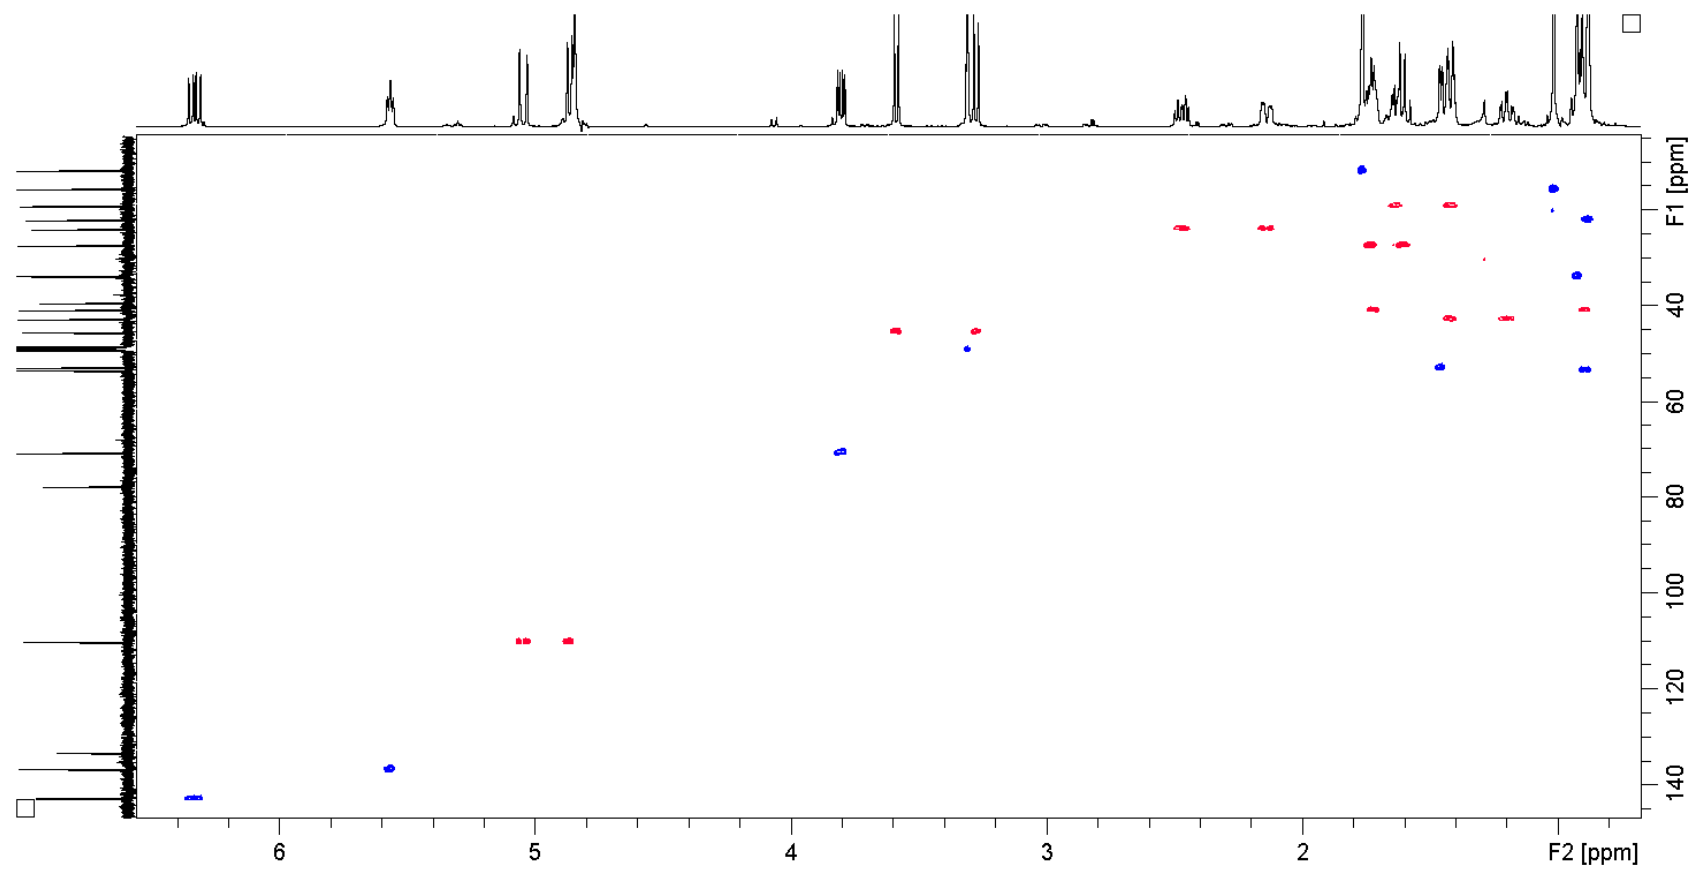

**Figure S19.** HSQC NMR spectrum of **2** ( $\text{CD}_3\text{OD}$ ).

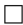☐

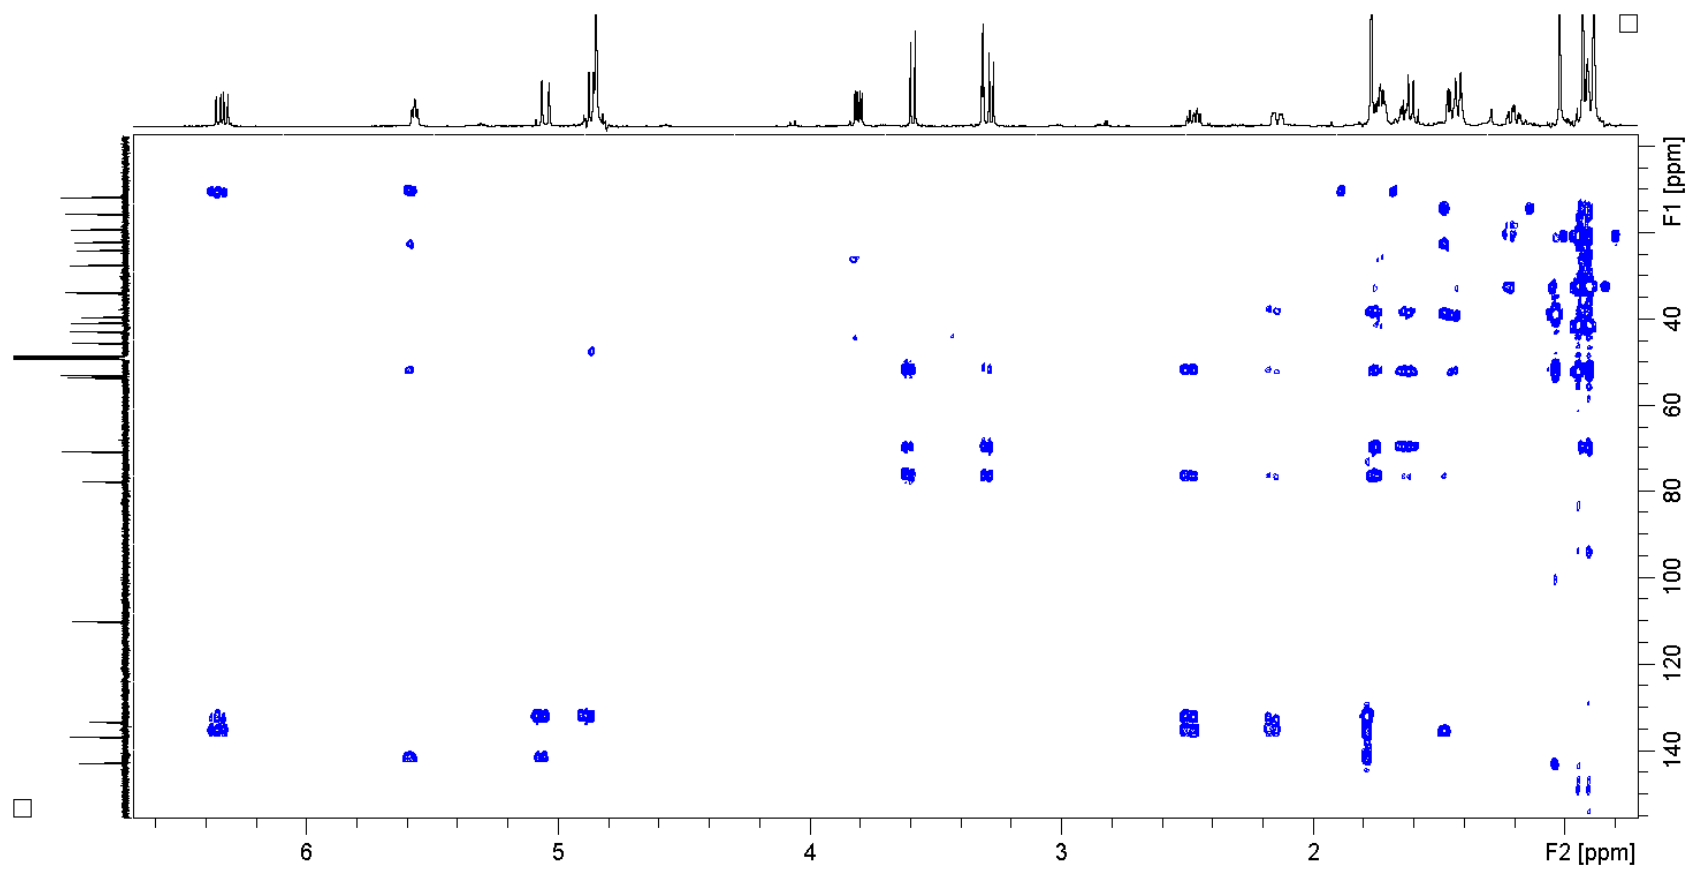

**Figure S21.** HMBC NMR spectrum of **2** (CD<sub>3</sub>OD)..



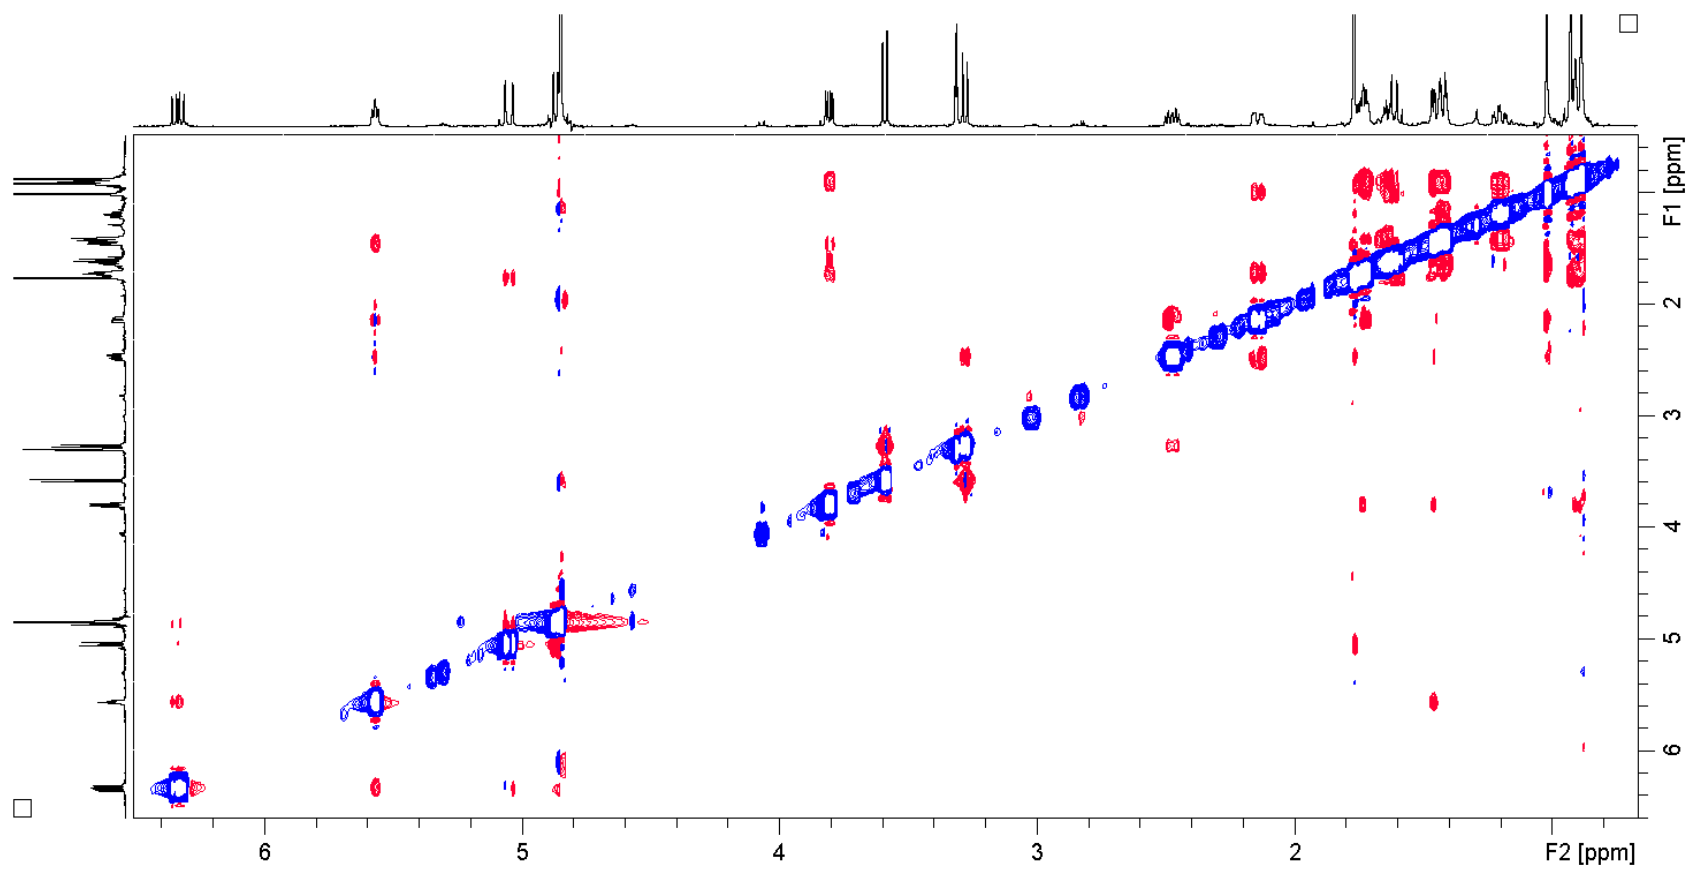

**Figure S22.** NOESY NMR spectrum of **2** (CD<sub>3</sub>OD).

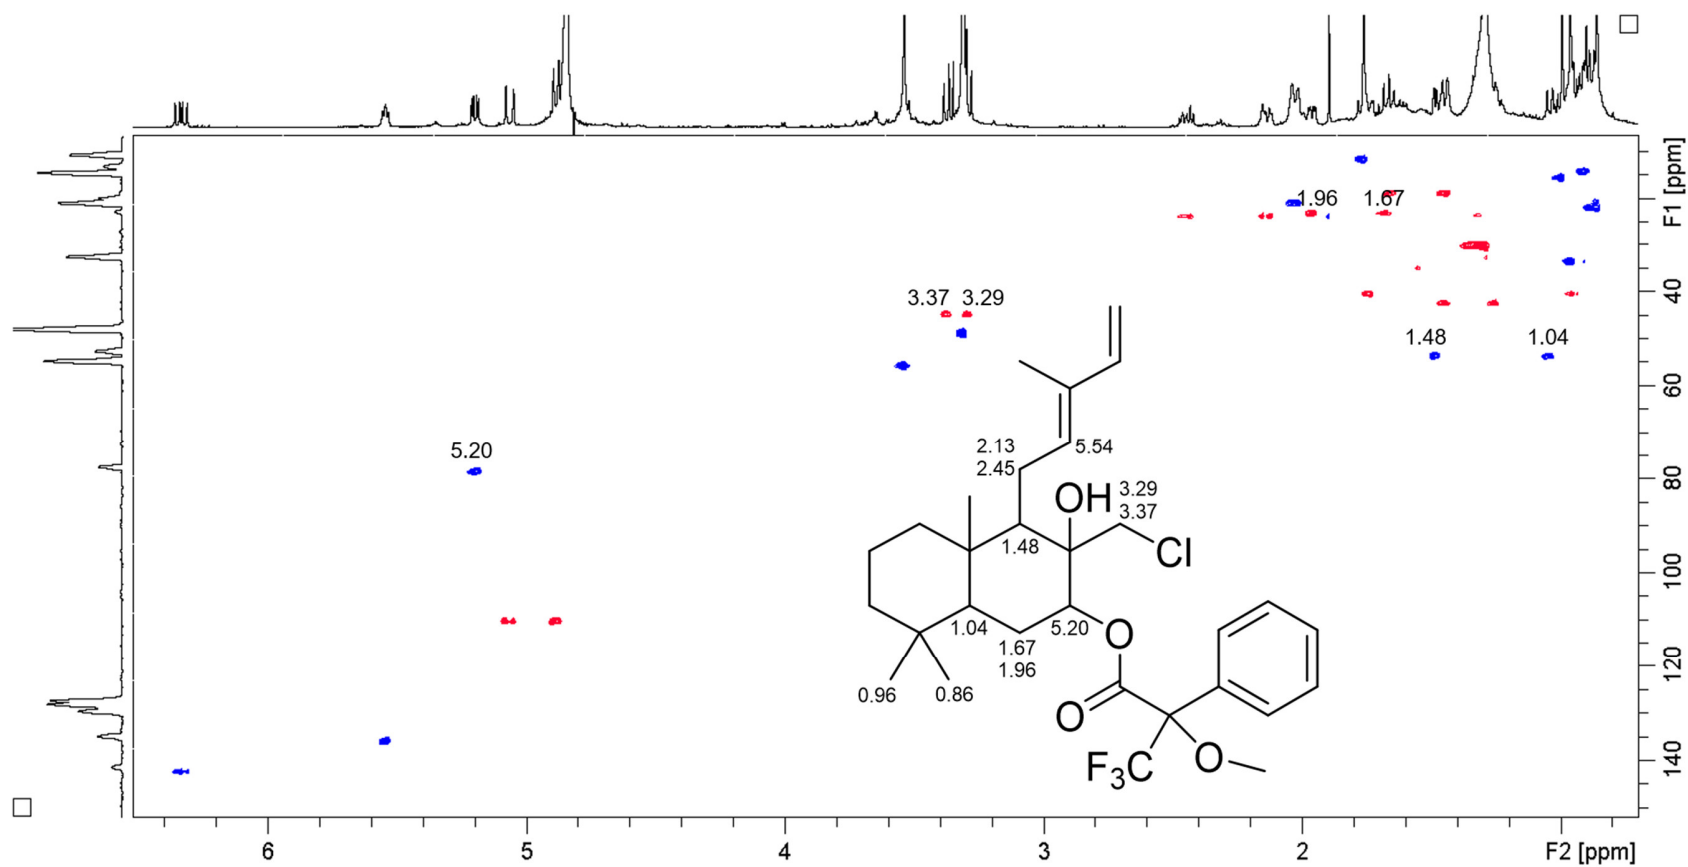

**Figure S23.** HSQC spectrum of (S)-MTPA esters of 2 (2a) (CD<sub>3</sub>OD).

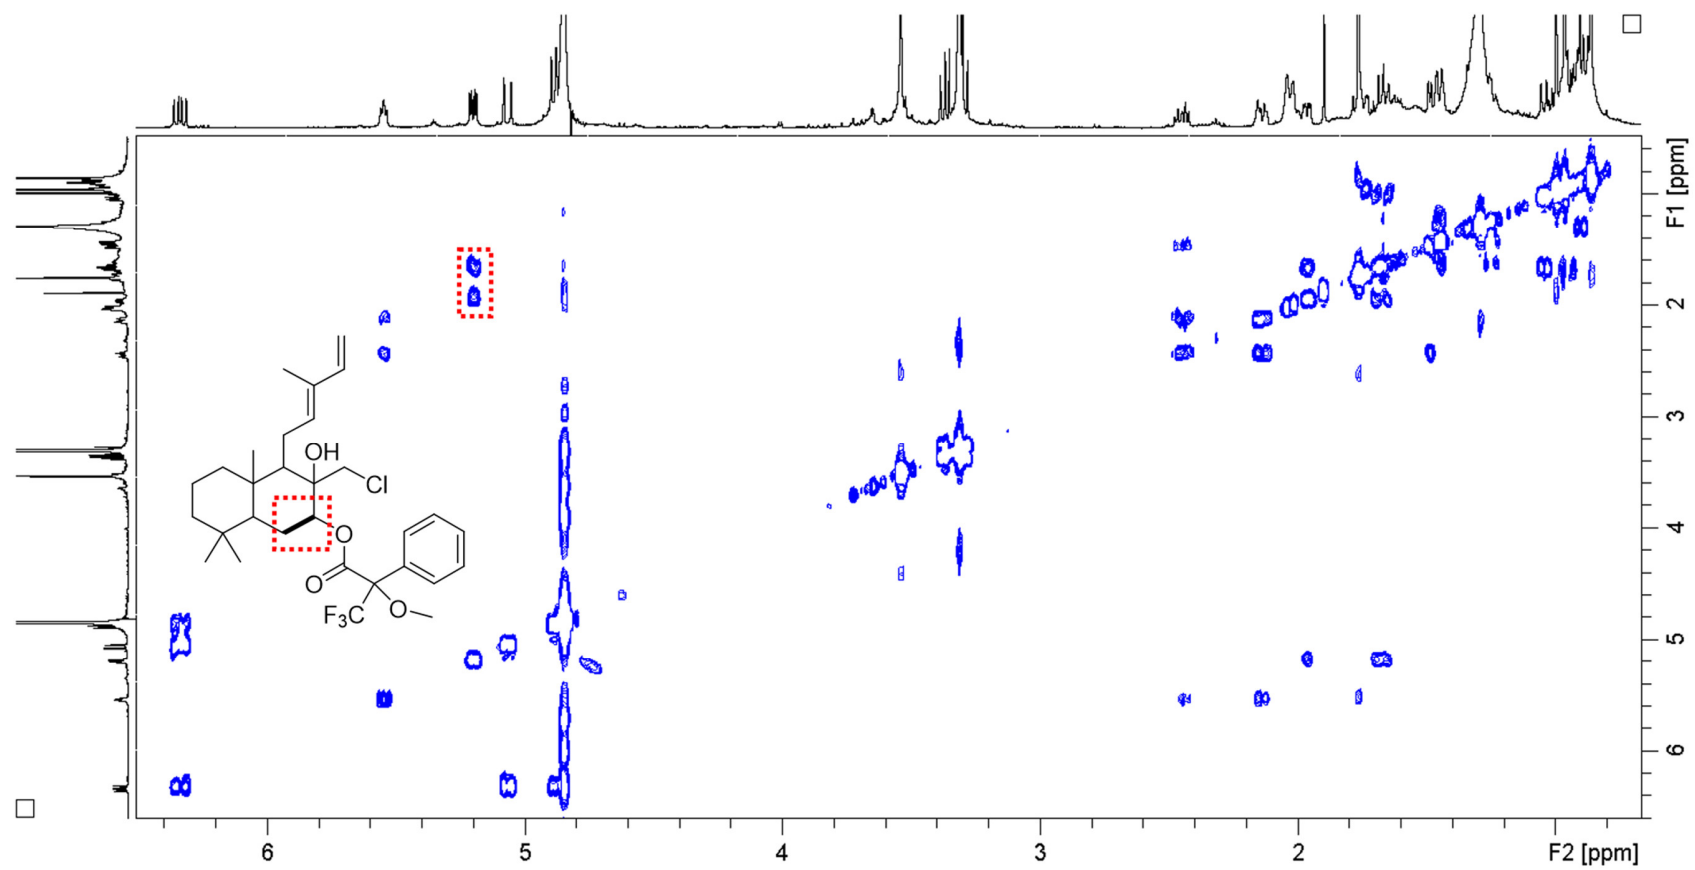

**Figure S24.**  $^1\text{H}$ - $^1\text{H}$  COSY spectrum of (*S*)-MTPA esters of **2** (**2a**) ( $\text{CD}_3\text{OD}$ ).

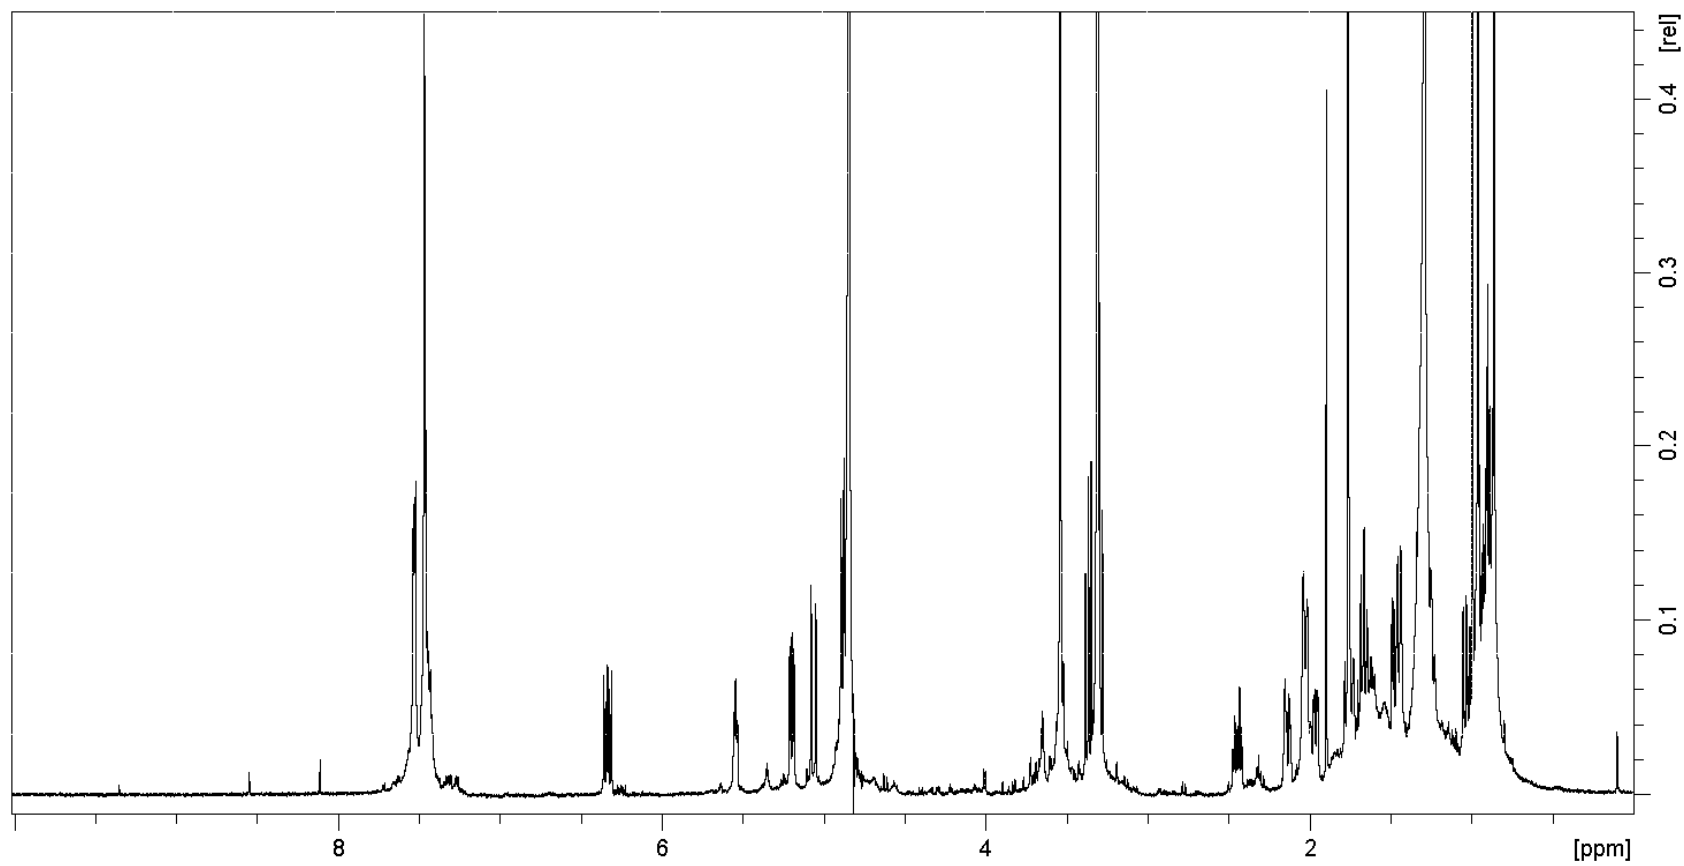

**Figure S25.**  $^1\text{H}$  NMR spectrum of (*S*)-MTPA esters of **2** (**2a**) ( $\text{CD}_3\text{OD}$ ).

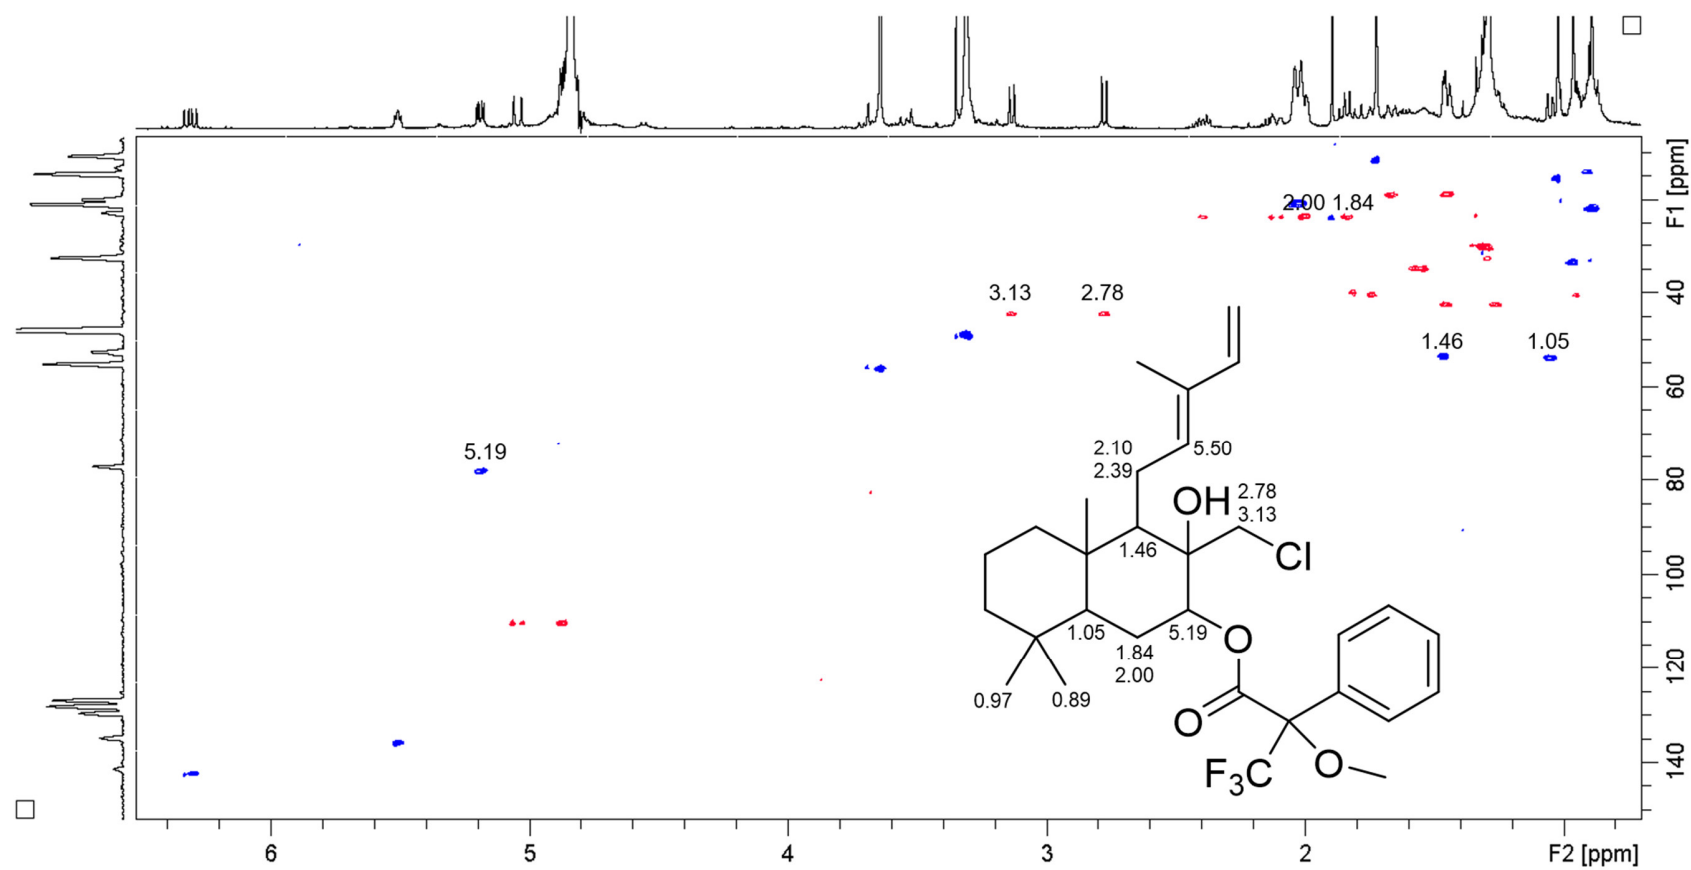

**Figure S26.** HSQC spectrum of (*R*)-MTPA esters of **2** (**2b**) (CD<sub>3</sub>OD).

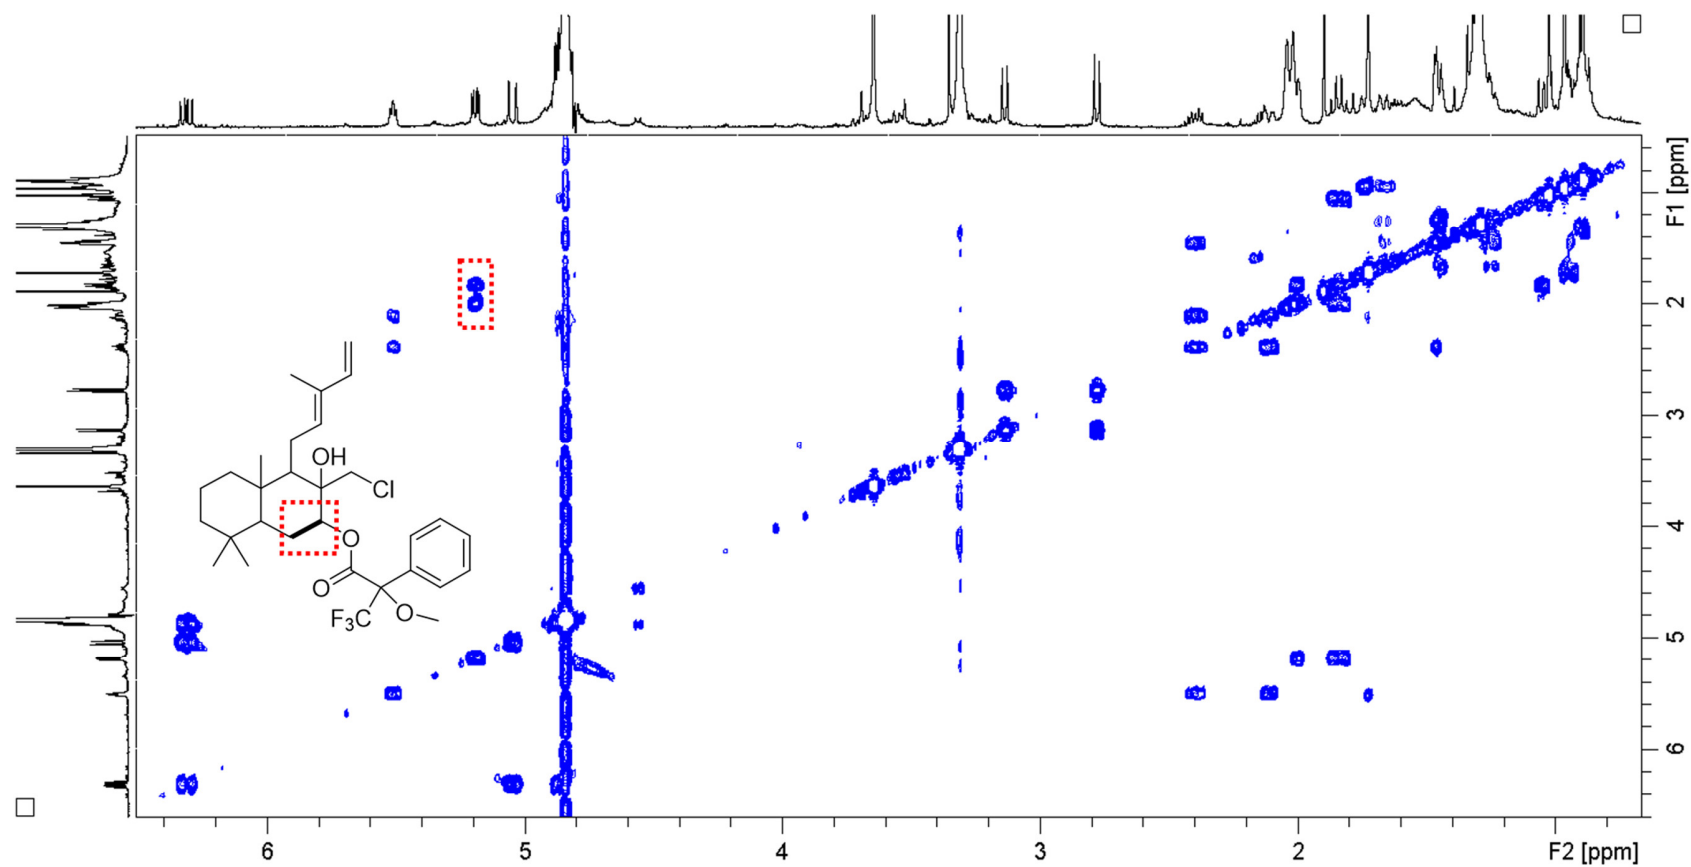

**Figure S27.**  $^1\text{H}$ - $^1\text{H}$  COSY spectrum of (*R*)-MTPA esters of **2** (**2b**) ( $\text{CD}_3\text{OD}$ ).

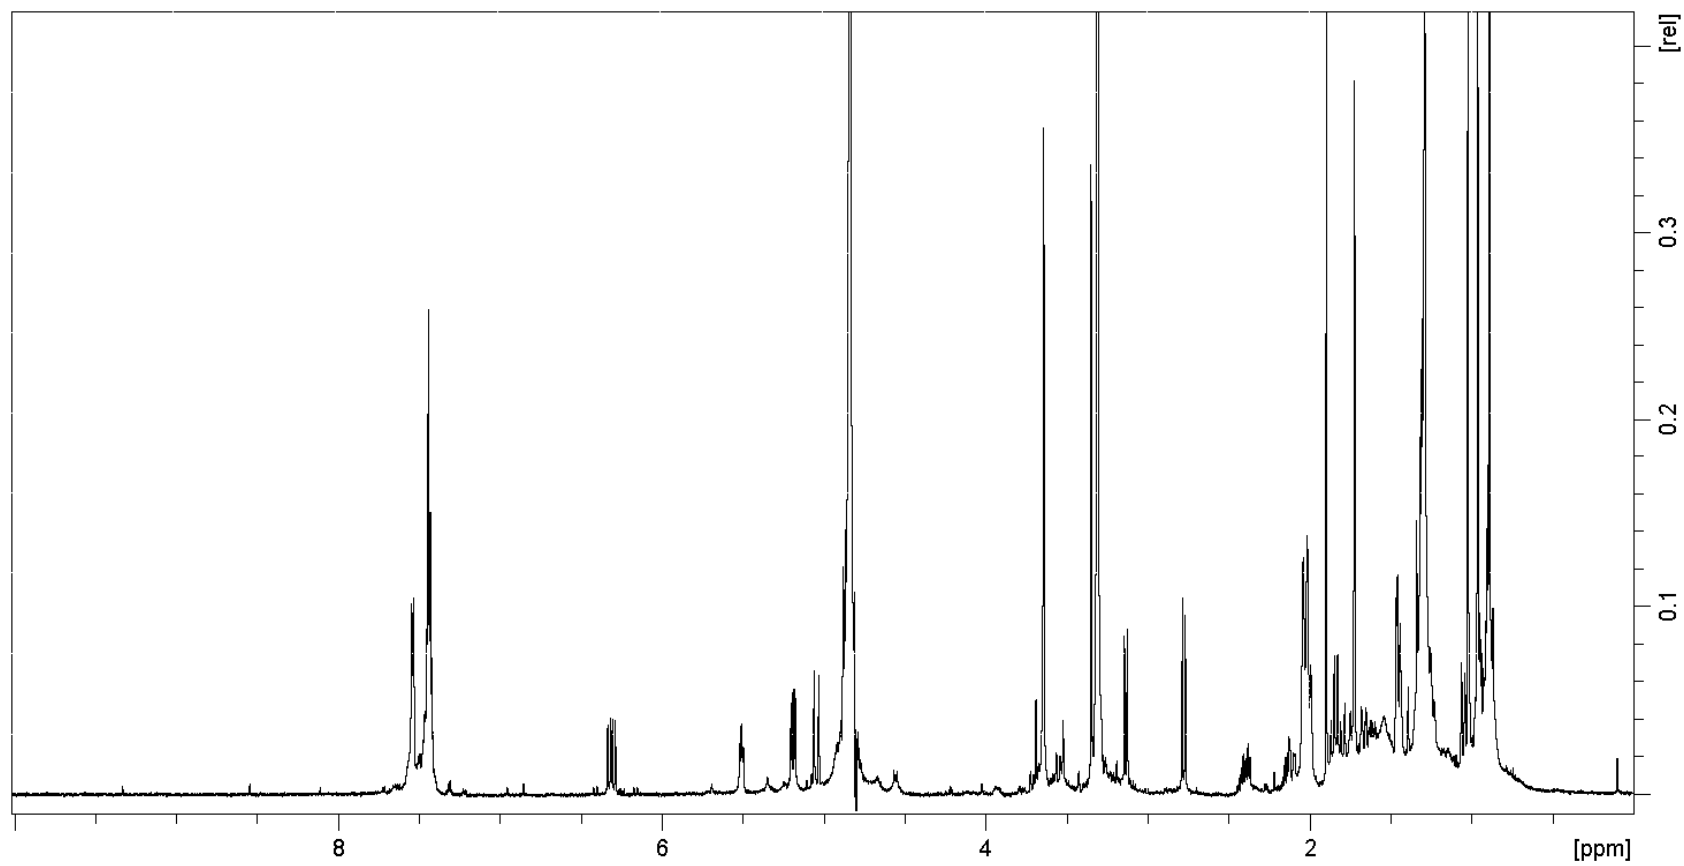

**Figure S28.**  $^1\text{H}$  NMR spectrum of (*R*)-MTPA esters of **2** (**2b**) ( $\text{CD}_3\text{OD}$ ).

**2a:** R = (S)-MTPA ester of **2**

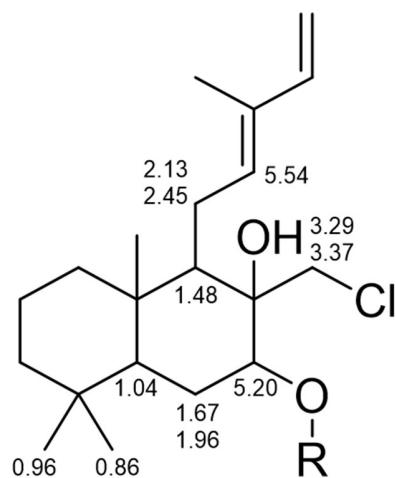

**2b:** R = (R)-MTPA ester of **2**

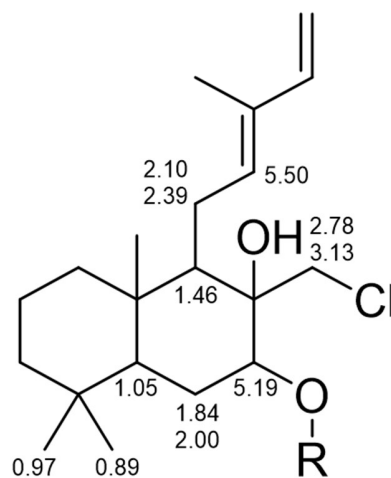

$\Delta\delta_H$  values (in ppm) =  $\delta_S - \delta_R$

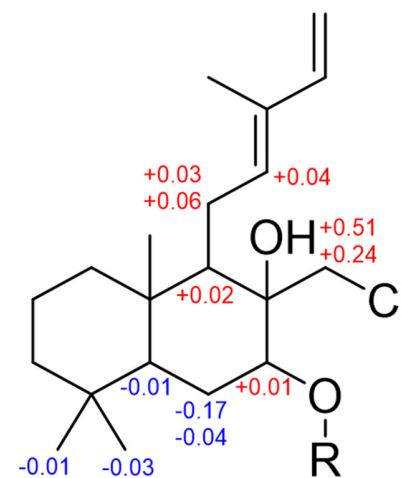

**Figure S29.** Summarized  $\Delta\delta$  values (in ppm) =  $\delta_S - \delta_R$  obtained for (S)- and (R)-MPTA esters of **2**.



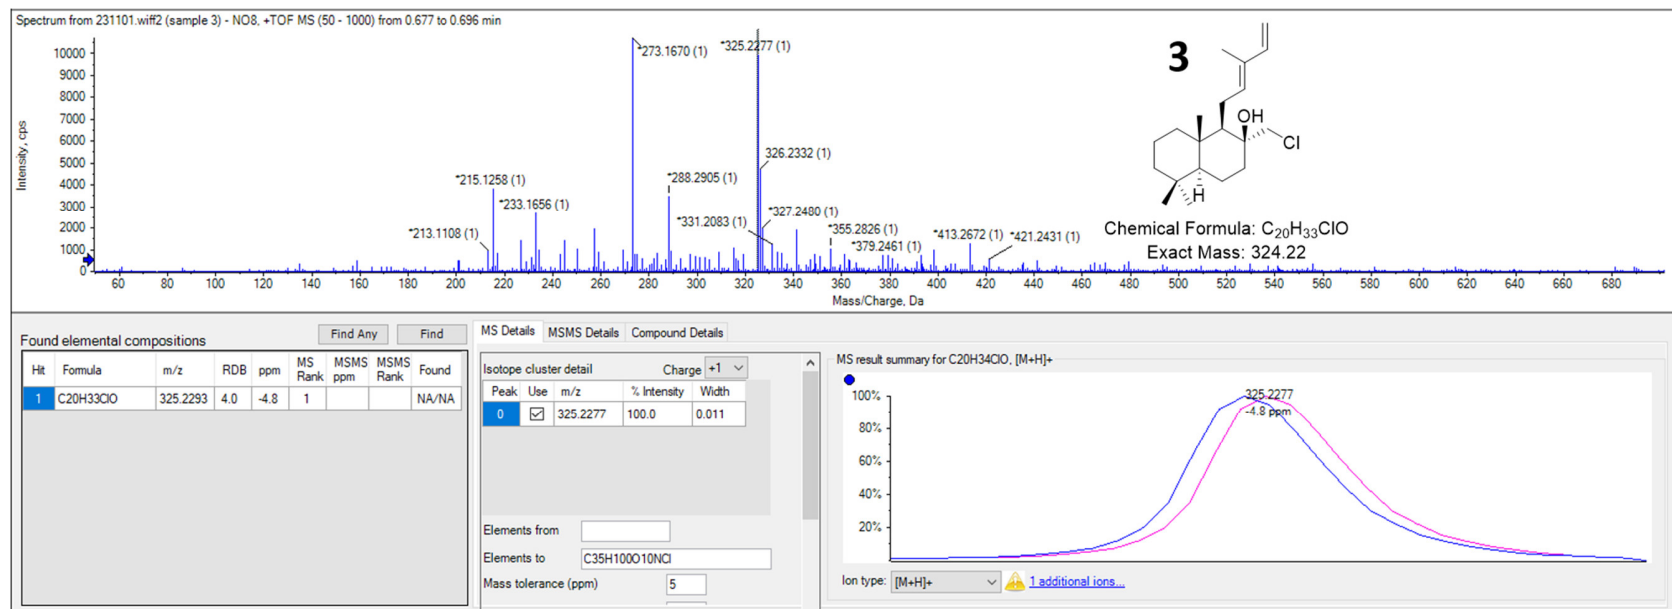

Figure S30. HRESIMS data of 3.

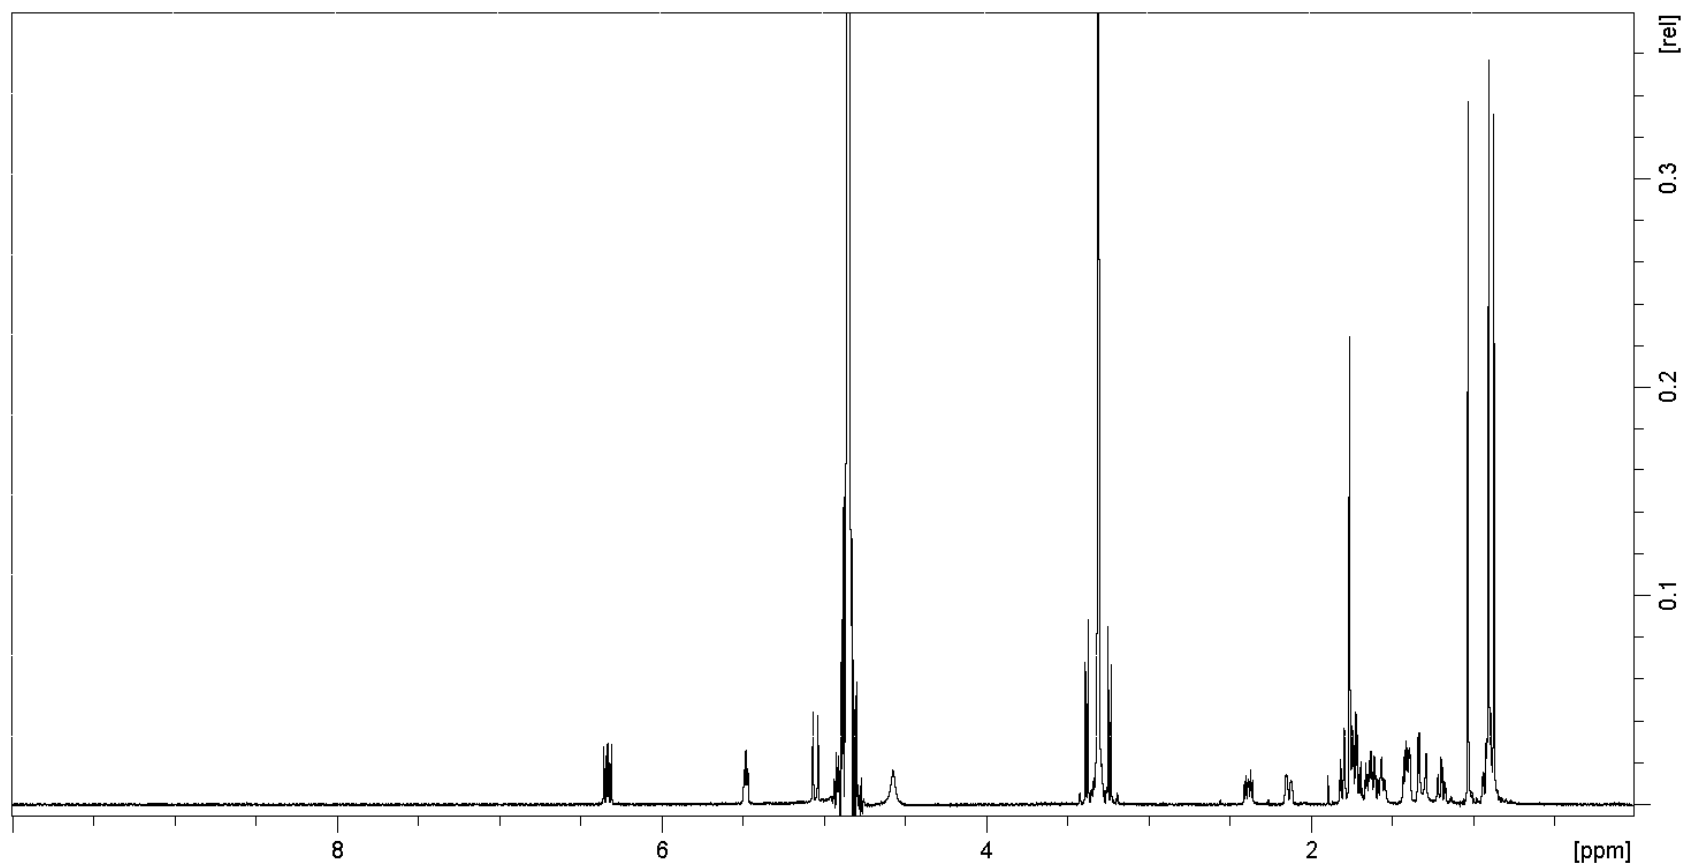

**Figure S31.**  $^1\text{H}$  NMR spectrum of **3** ( $\text{CD}_3\text{OD}$ ).

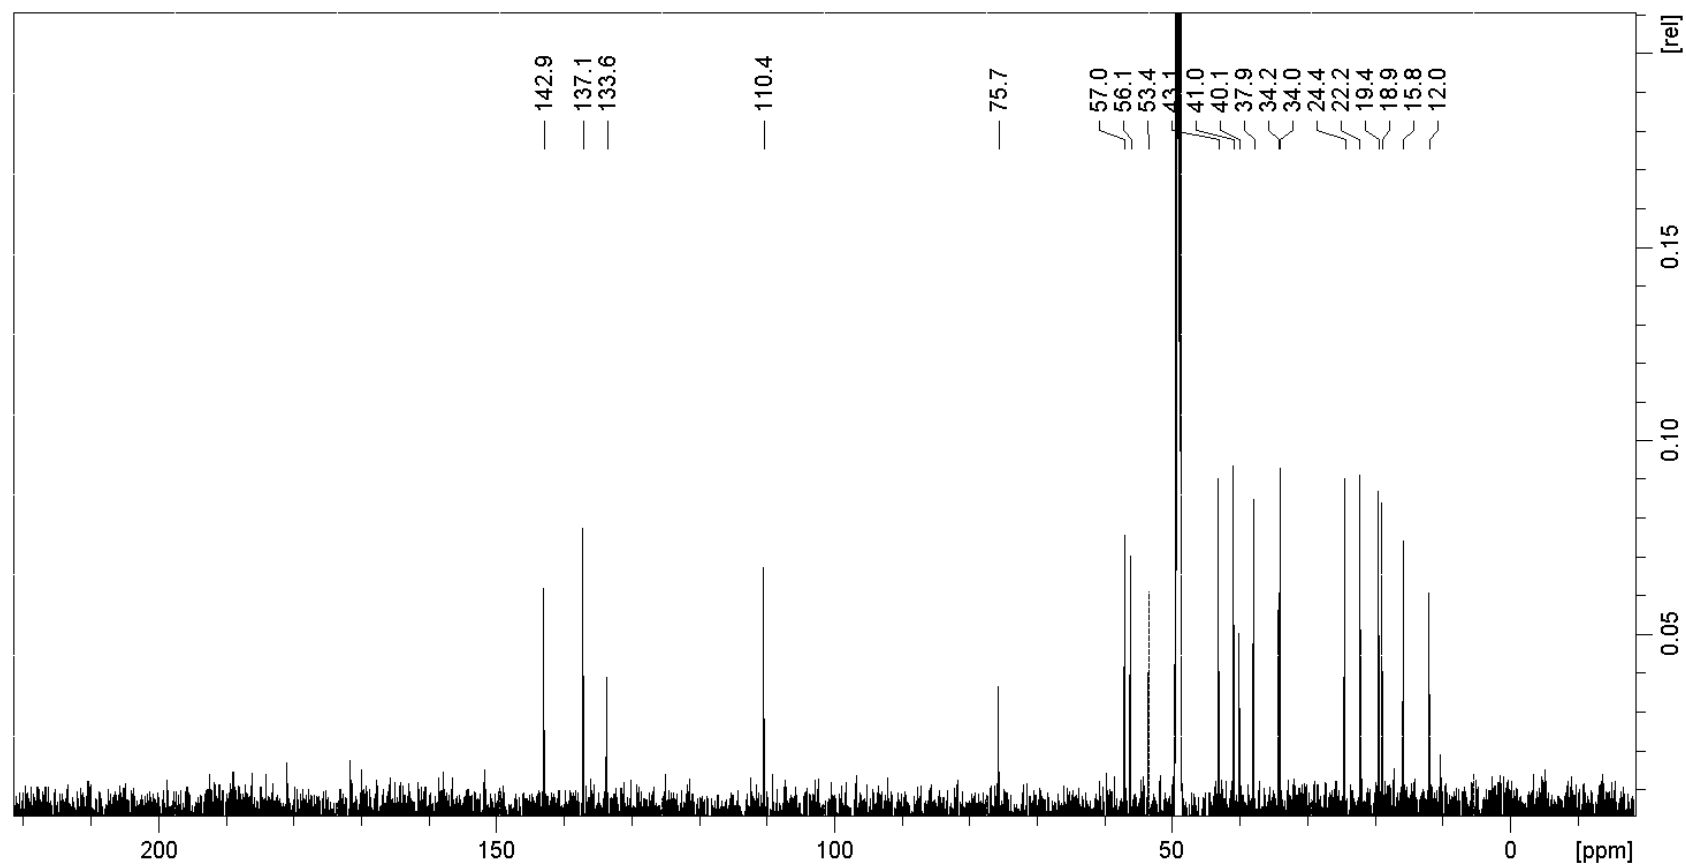

**Figure S32.**  $^{13}\text{C}$  NMR spectrum of **3** ( $\text{CD}_3\text{OD}$ ).

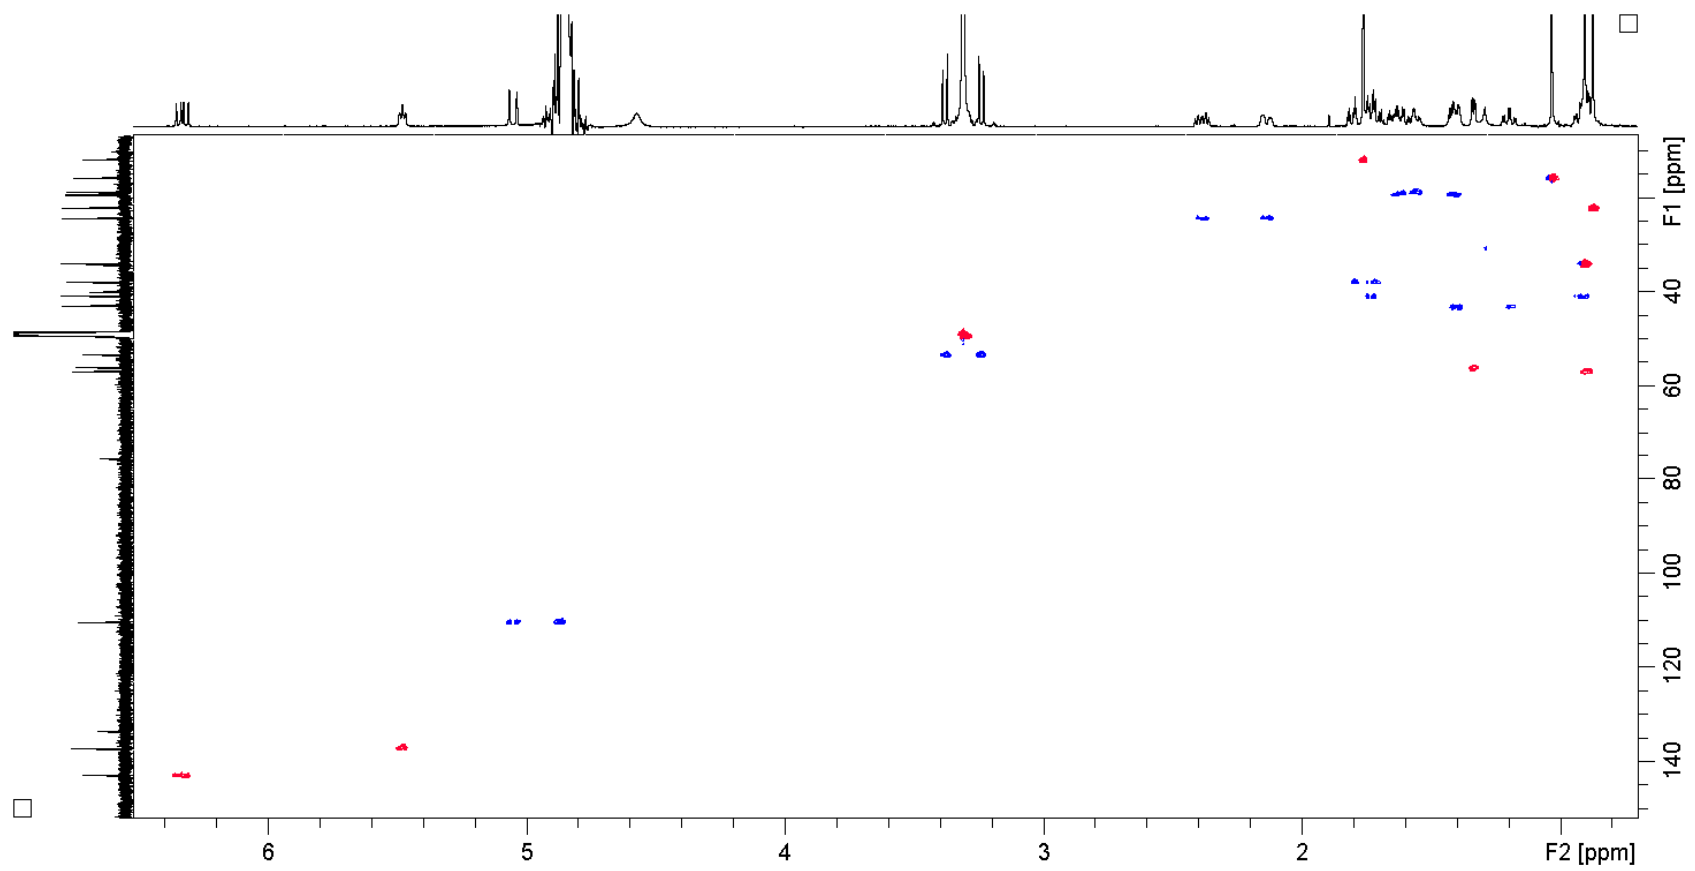

**Figure S33.** HSQC NMR spectrum of **3** (CD<sub>3</sub>OD).

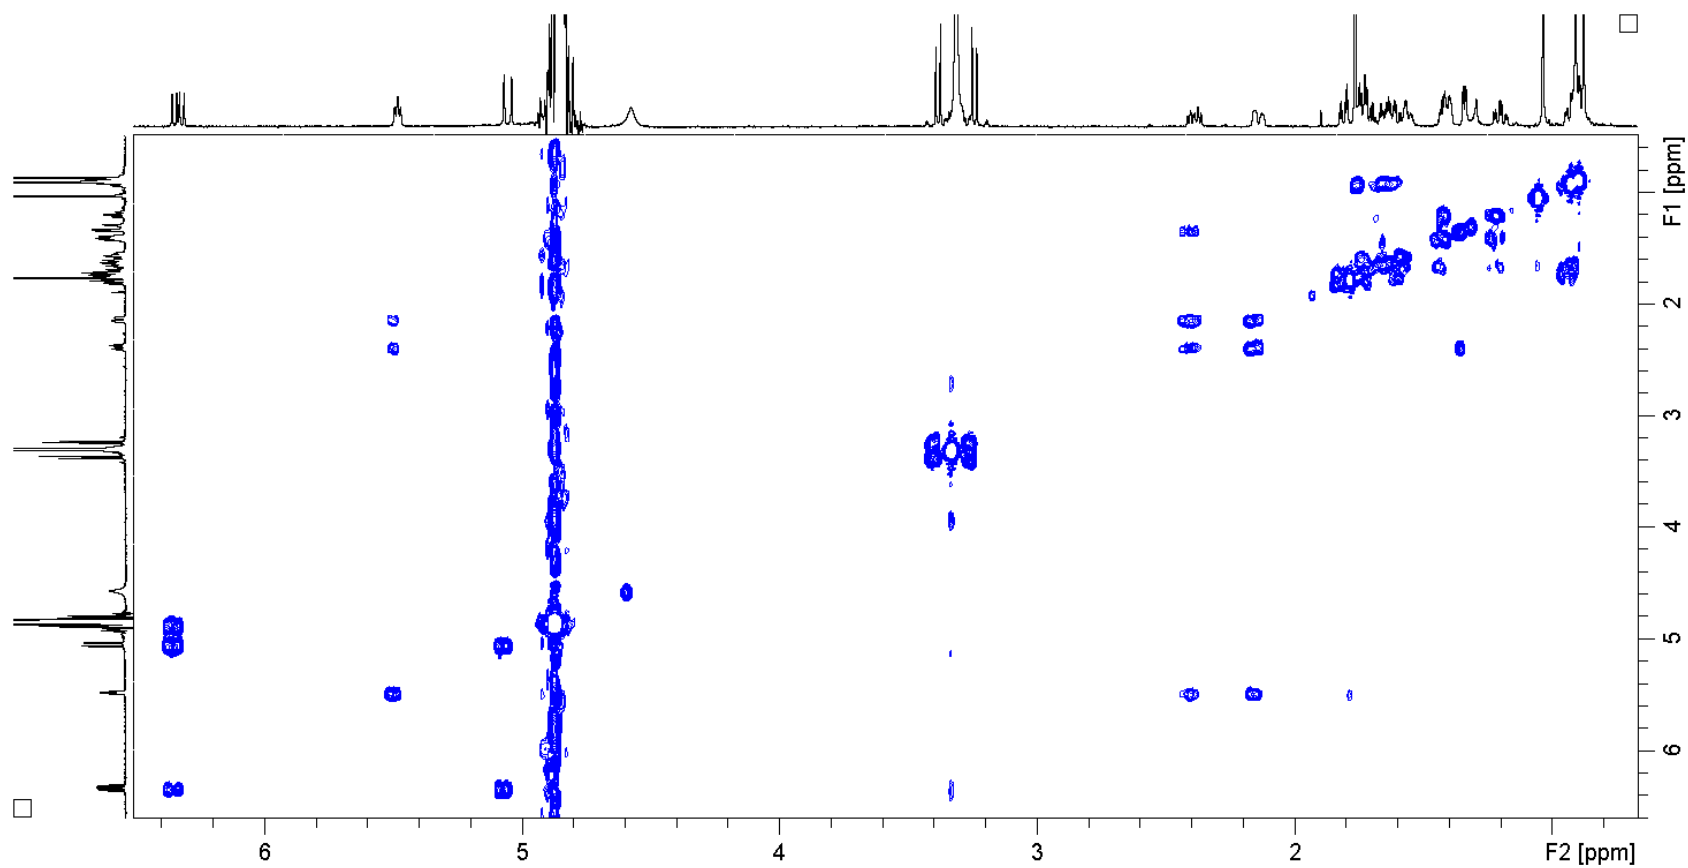

**Figure S34.**  $^1\text{H}$ - $^1\text{H}$  COSY NMR spectrum of **3** ( $\text{CD}_3\text{OD}$ ).

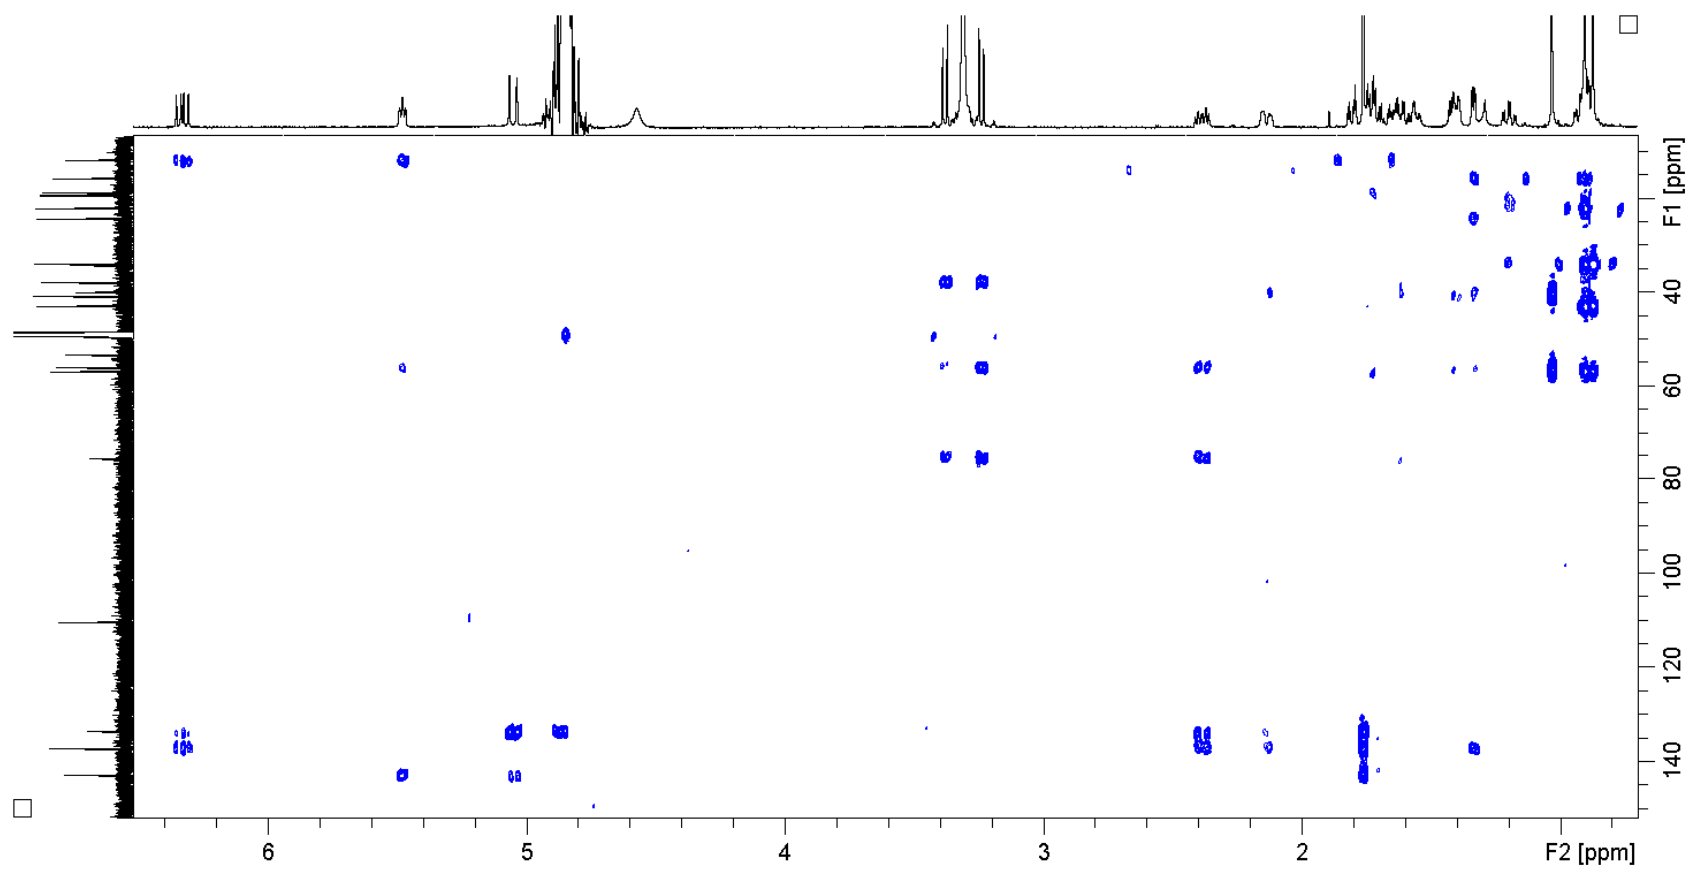

**Figure S35.** HMBC NMR spectrum of **3** (CD<sub>3</sub>OD).

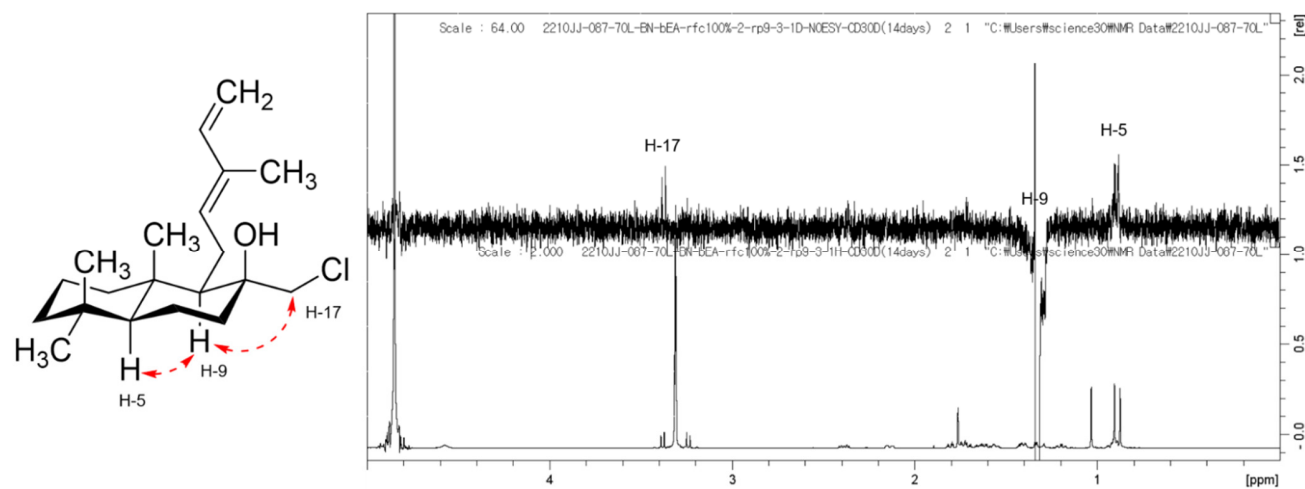

**Figure S36.** 1D selective NOESY data of **3** (irradiated H-9) (CD<sub>3</sub>OD).

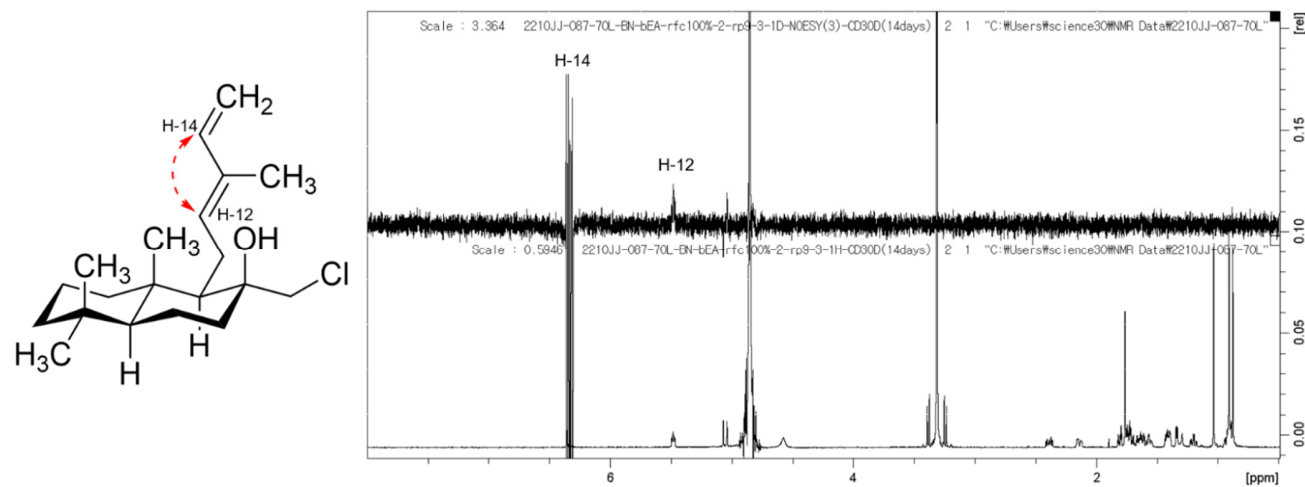

**Figure S37.** 1D selective NOESY data of **3** (irradiated H-14) (CD<sub>3</sub>OD).

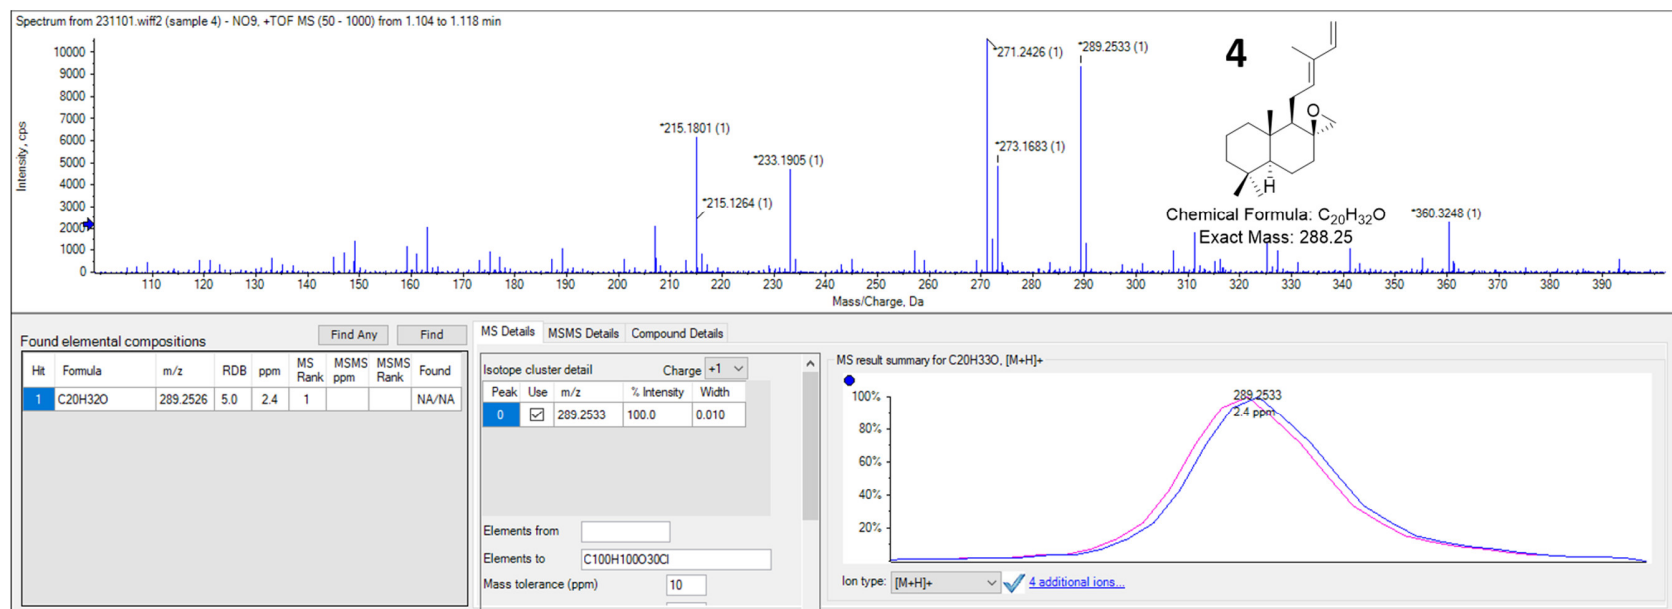

**Figure S38.** HRESIMS data of **4**.



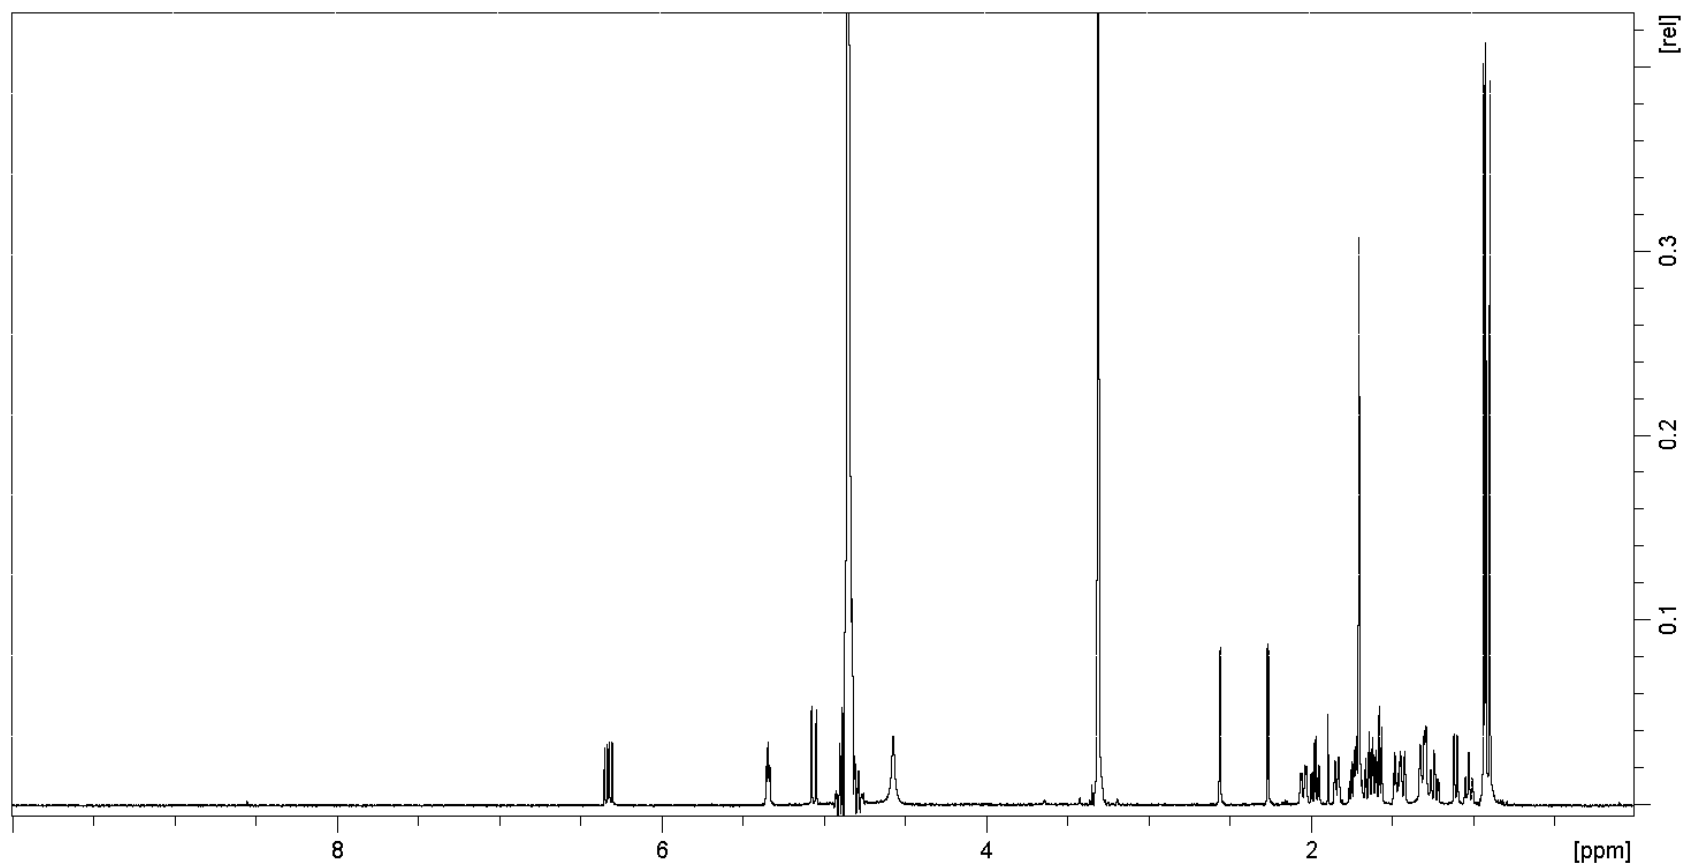

**Figure S39.**  $^1\text{H}$  NMR spectrum of **4** ( $\text{CD}_3\text{OD}$ ).

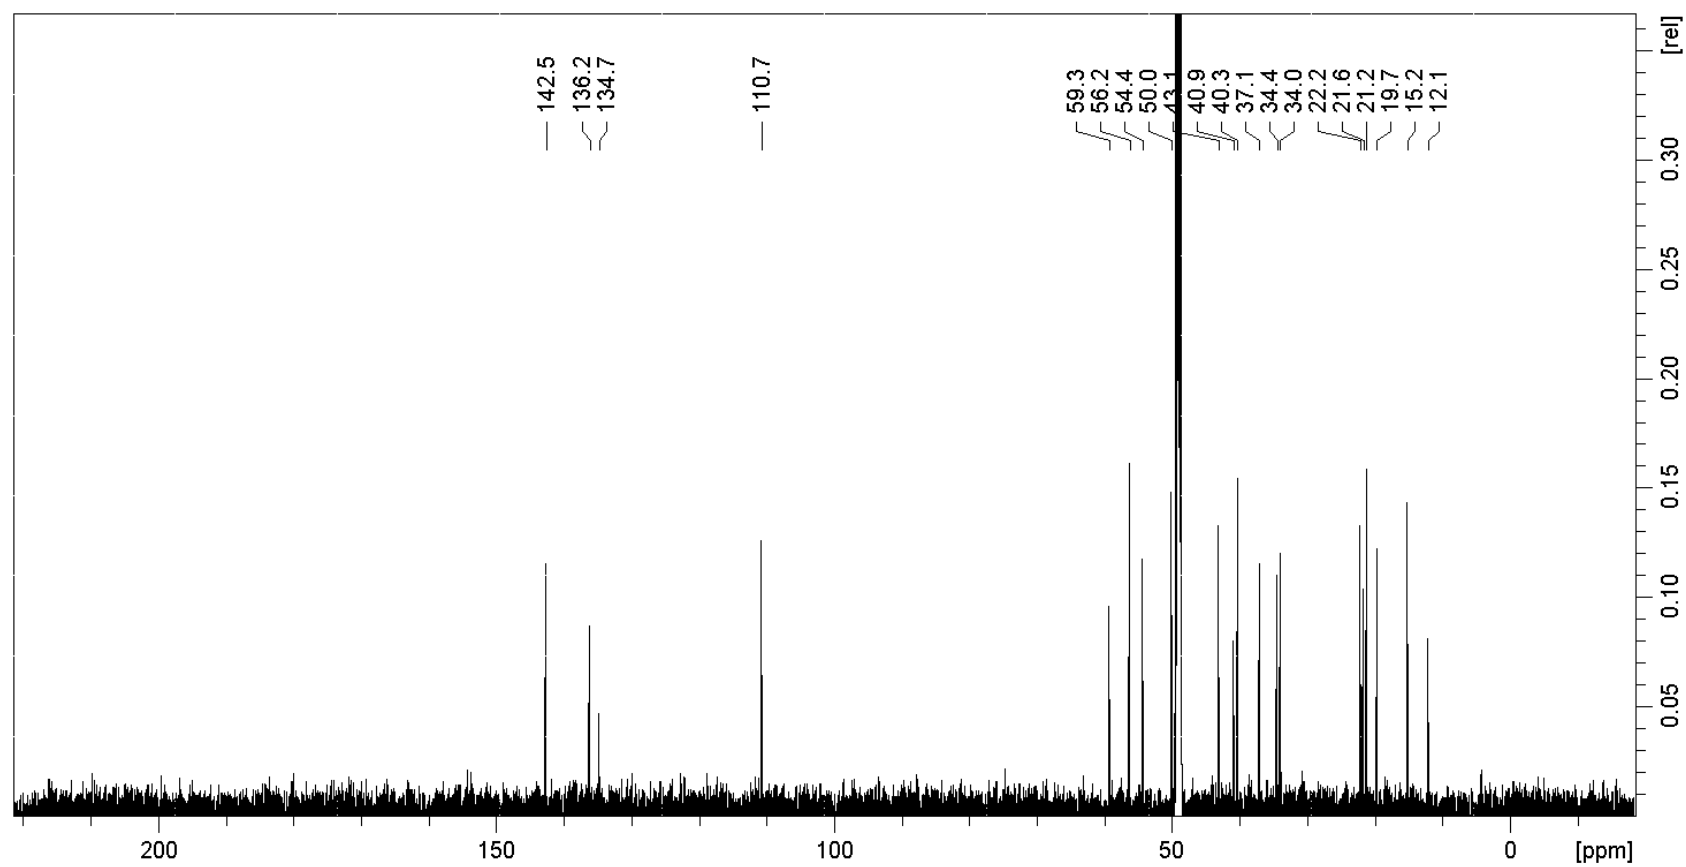

**Figure S40.**  $^{13}\text{C}$  NMR spectrum of **4** ( $\text{CD}_3\text{OD}$ ).

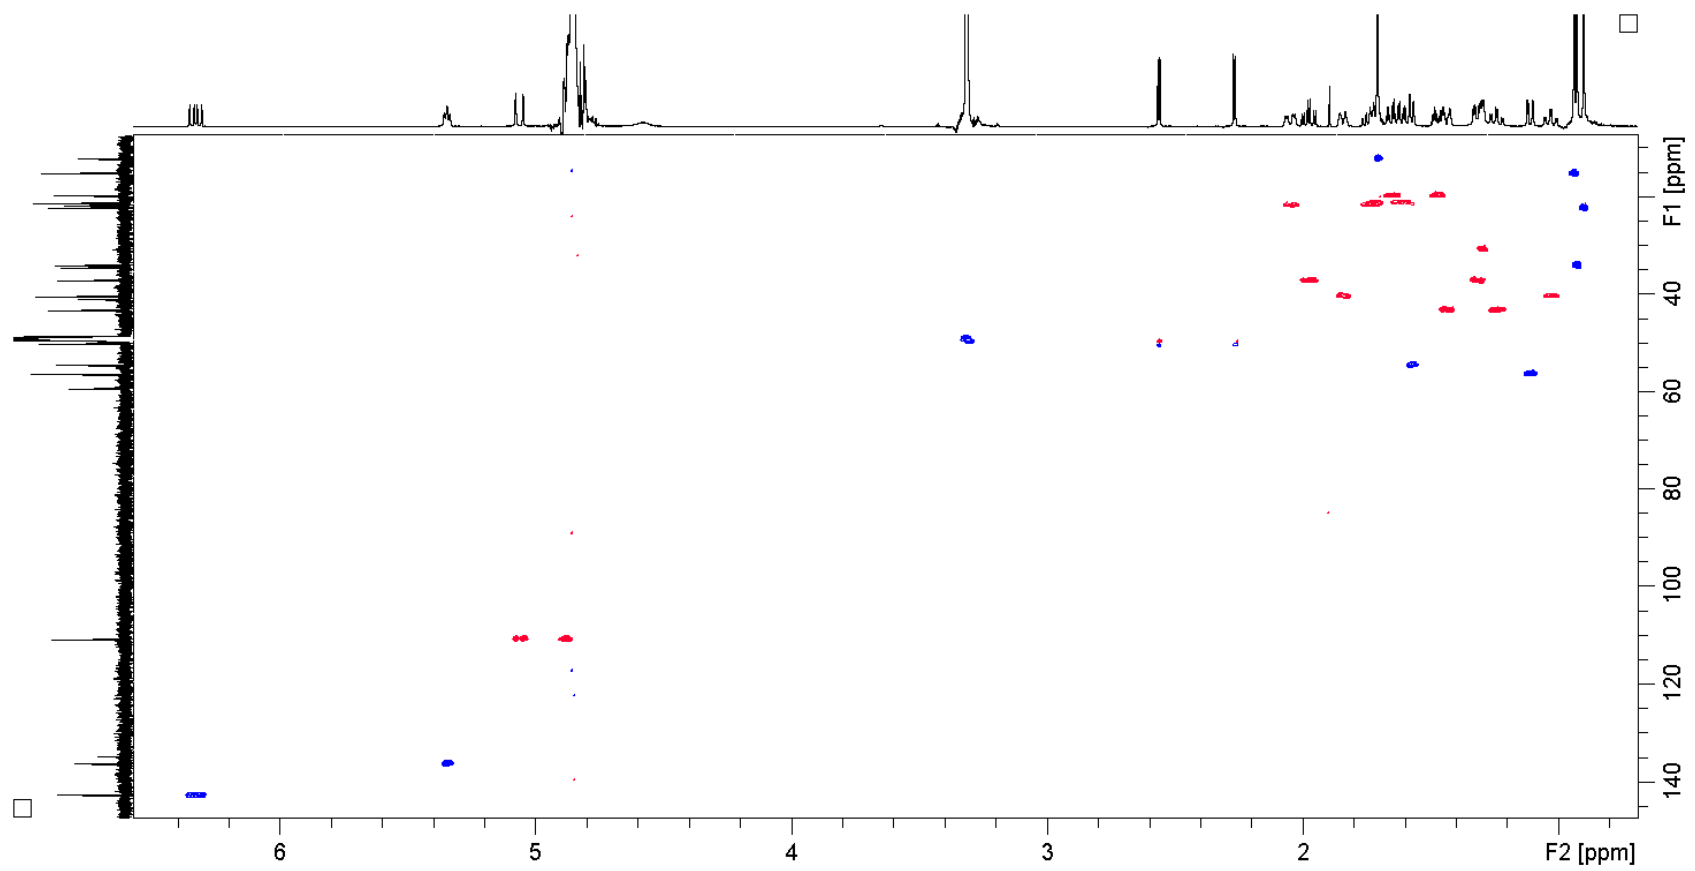

**Figure S41.** HSQC NMR spectrum of **4** (CD<sub>3</sub>OD).

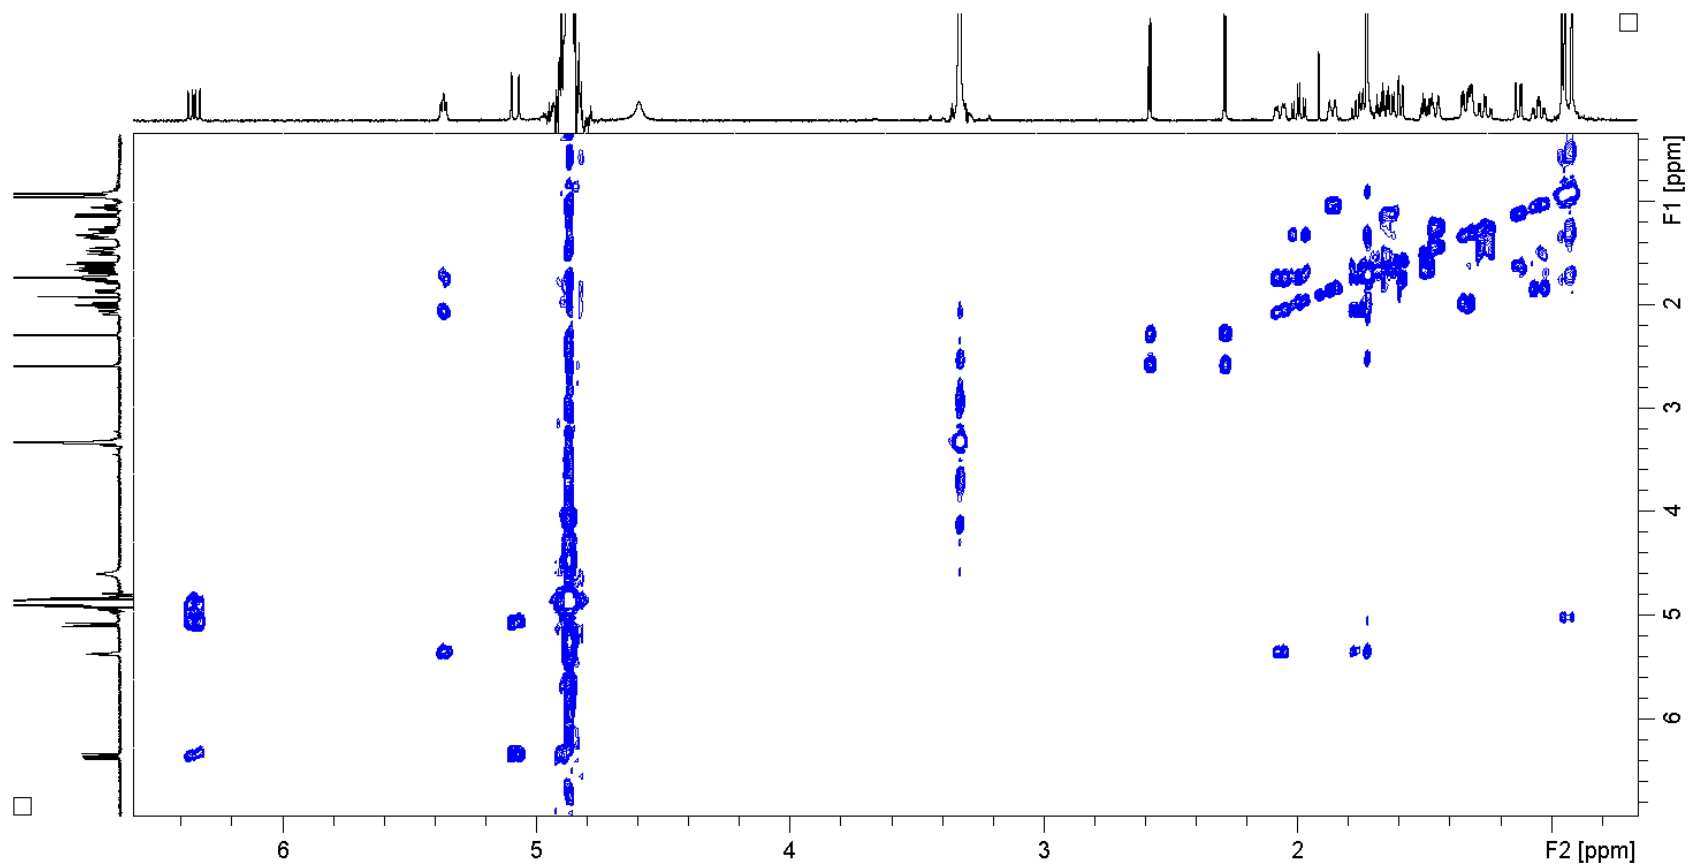

**Figure S42.**  $^1\text{H}$ - $^1\text{H}$  COSY NMR spectrum of **4** ( $\text{CD}_3\text{OD}$ ).

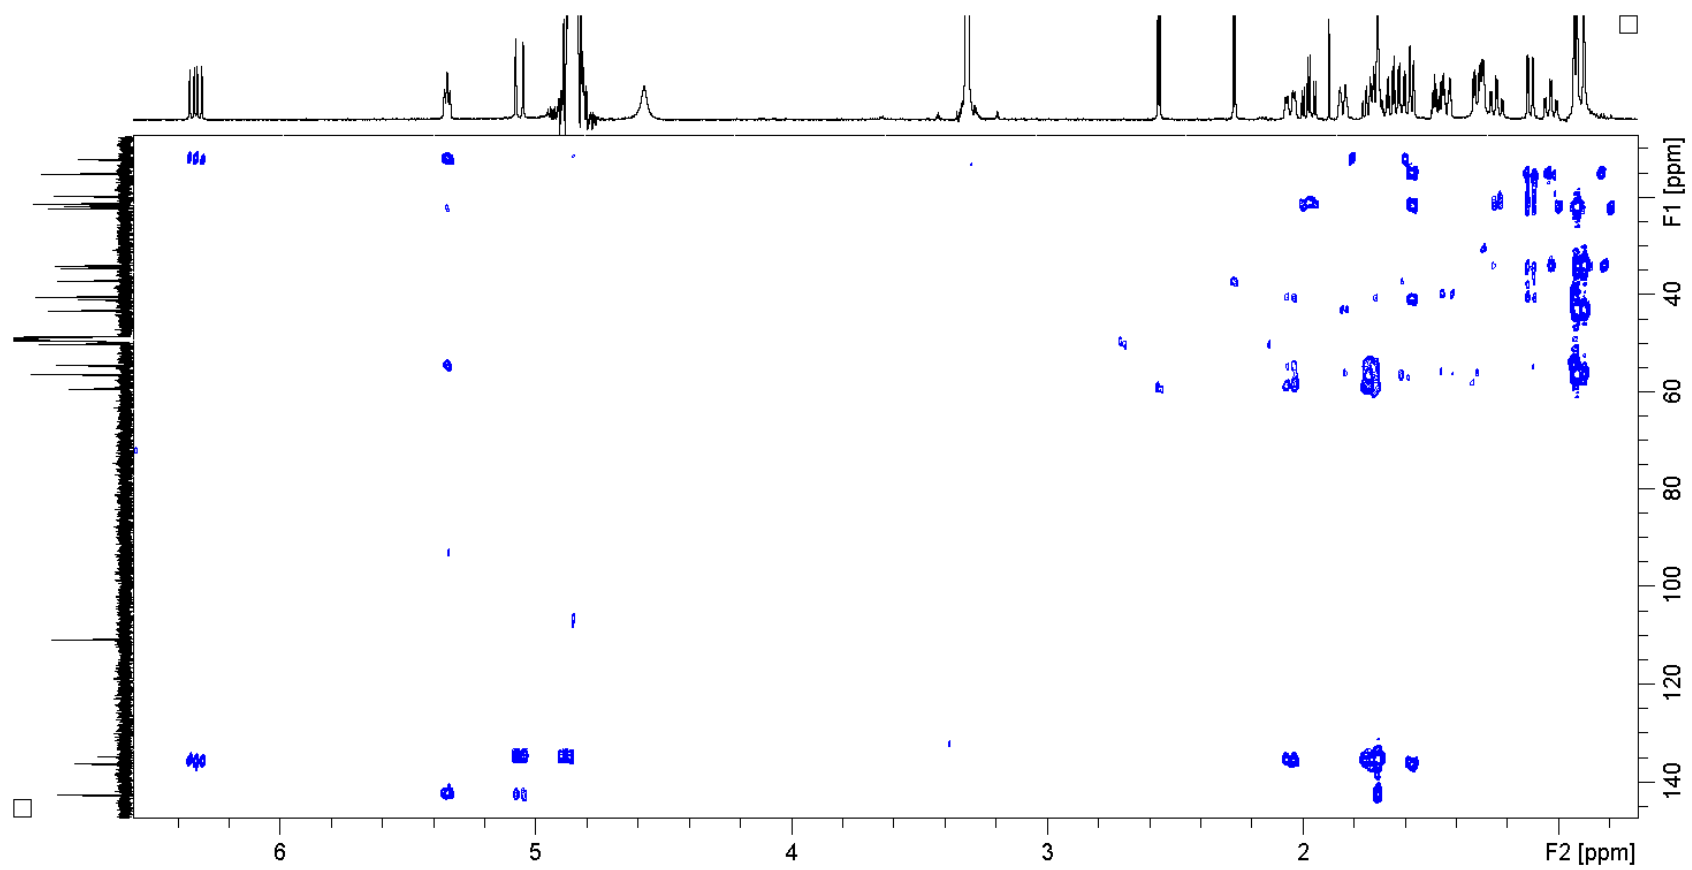

**Figure S43.** HMBC NMR spectrum of **4** (CD<sub>3</sub>OD).

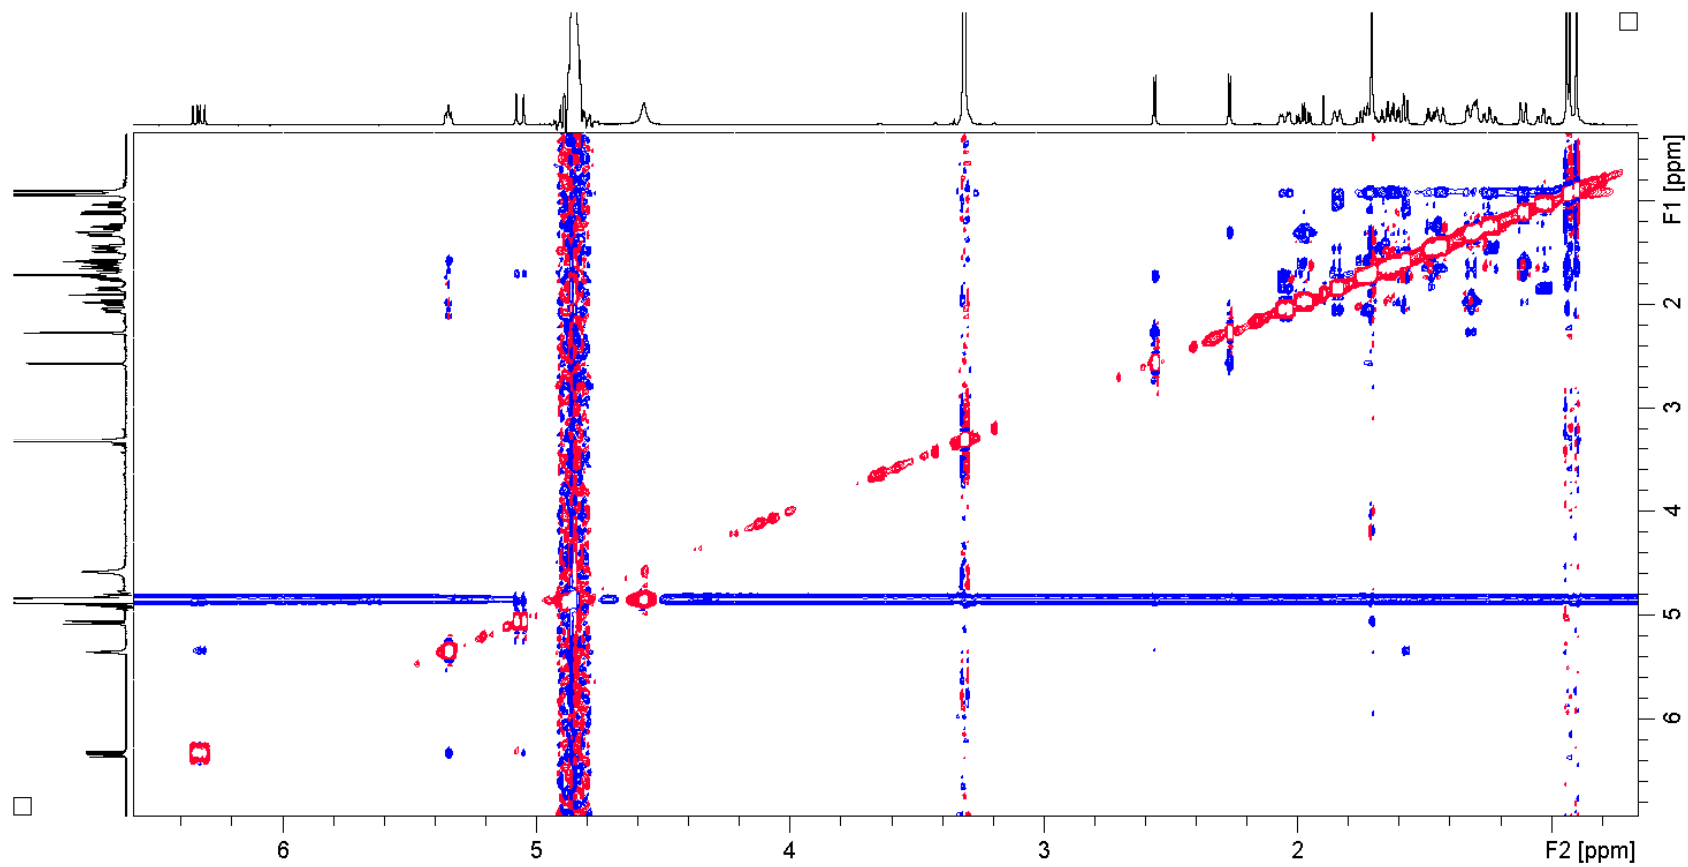

**Figure S44.** NOESY NMR spectrum of **4** (CD<sub>3</sub>OD).

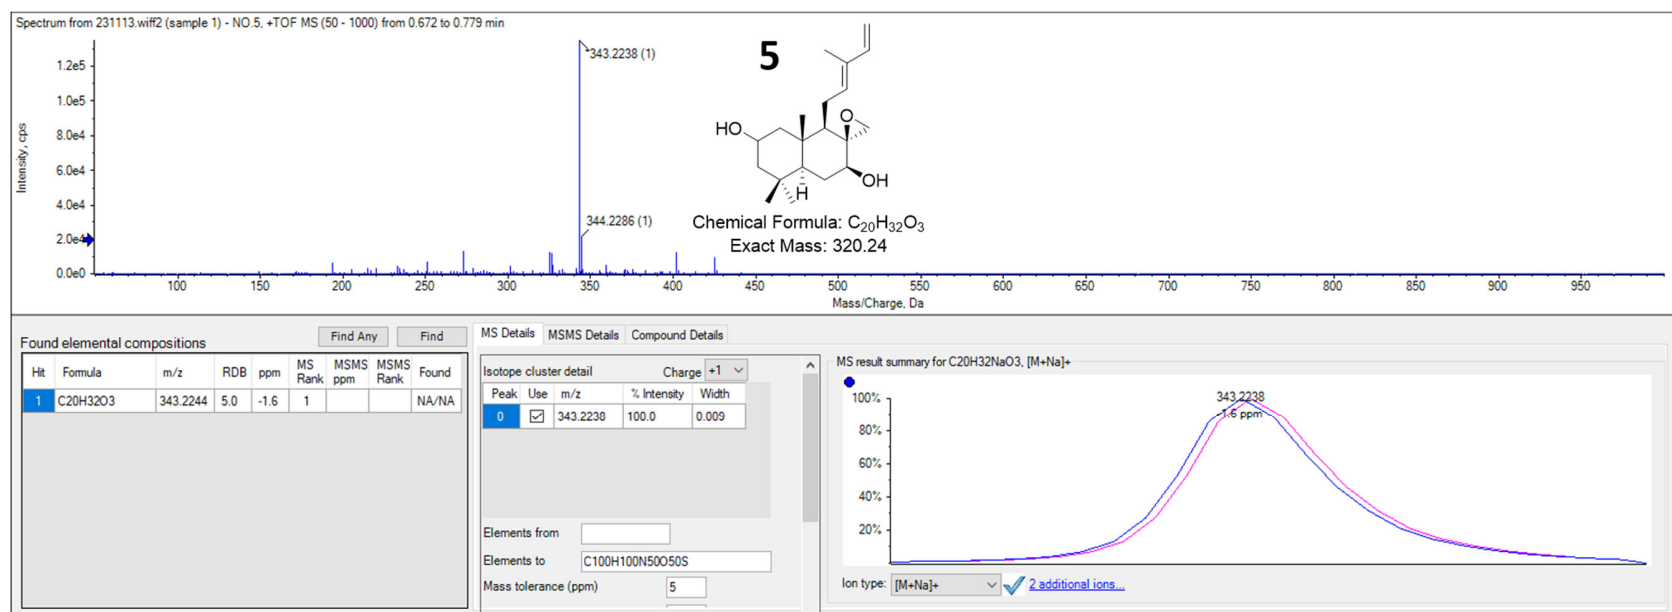

**Figure S45.** HRESIMS data of **5**.

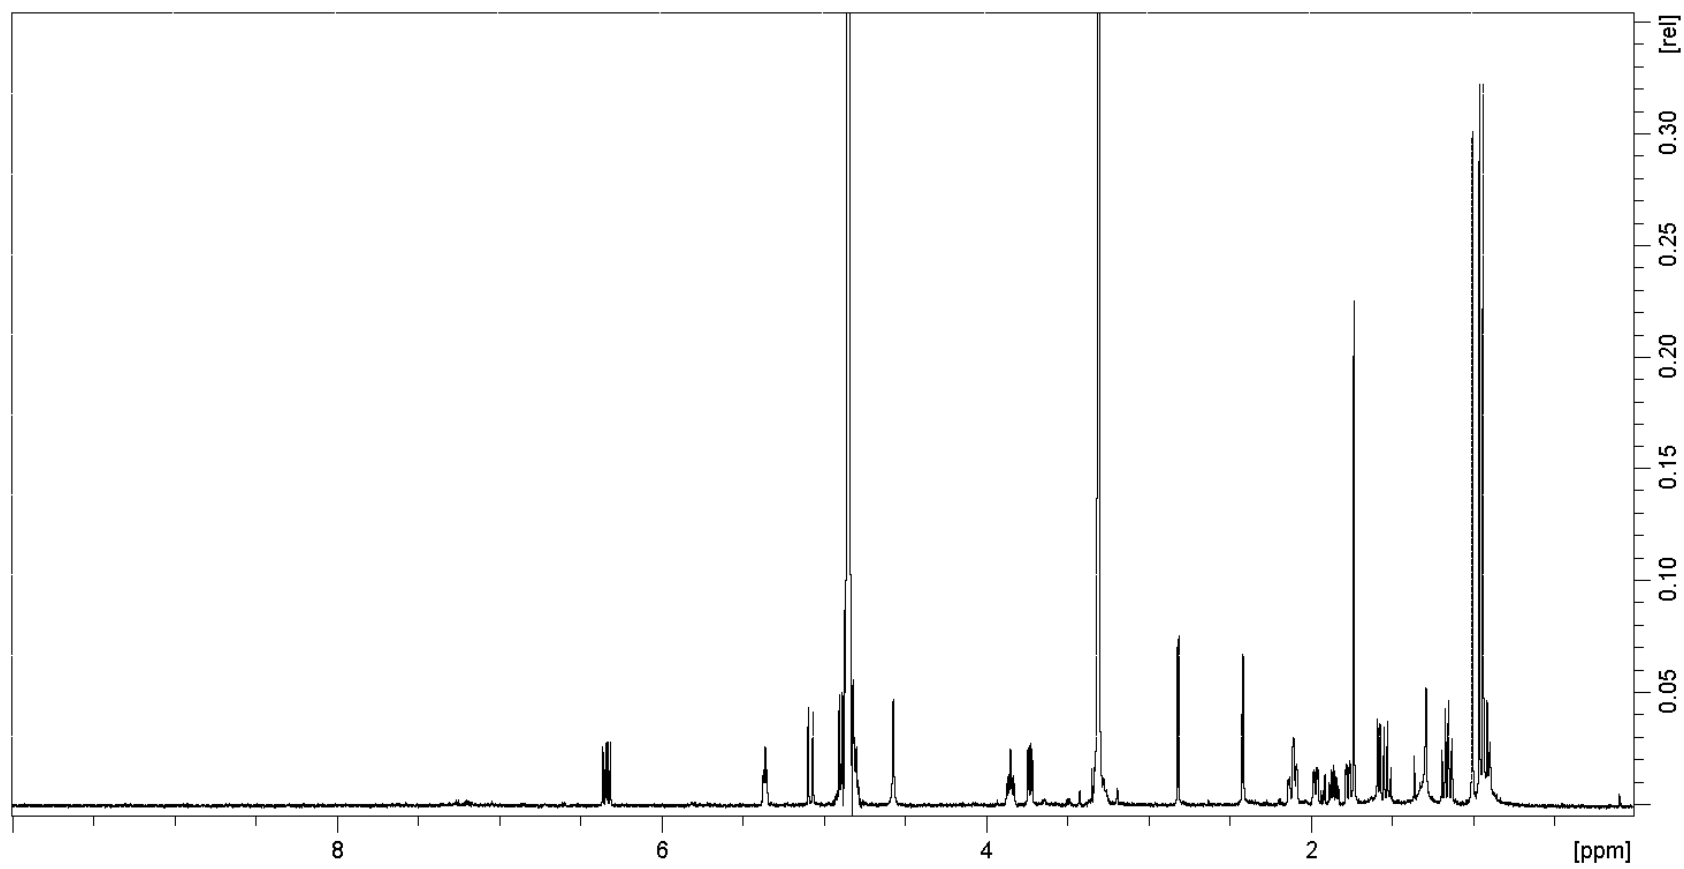



**Figure S46.**  $^1\text{H}$  NMR spectrum of **5** ( $\text{CD}_3\text{OD}$ ).

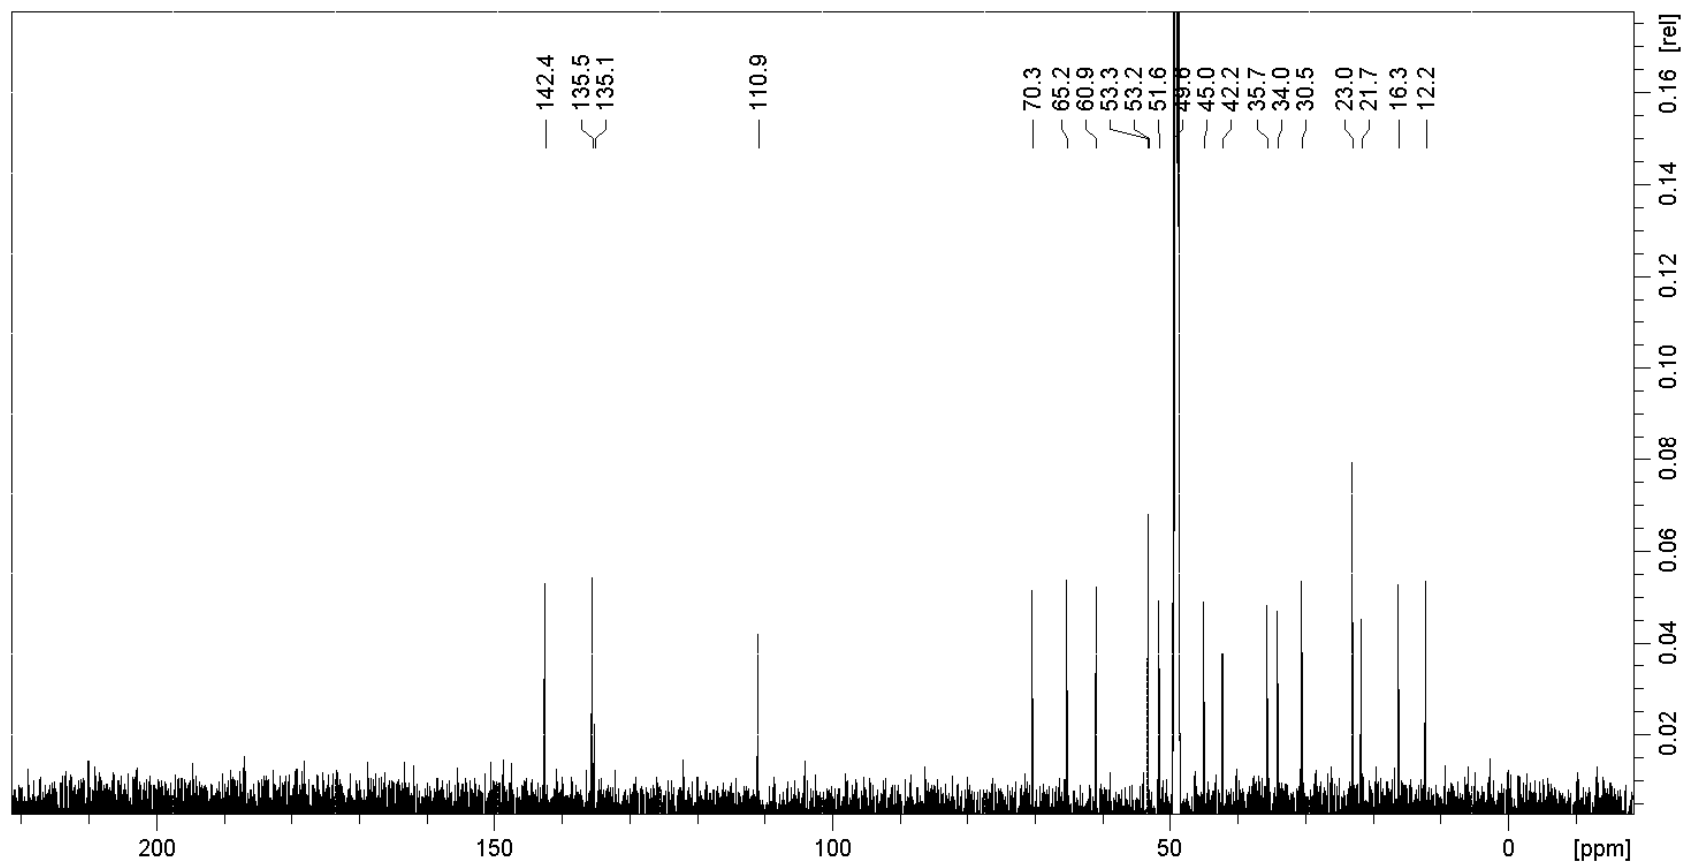

**Figure S47.**  $^{13}\text{C}$  NMR spectrum of **5** ( $\text{CD}_3\text{OD}$ ).

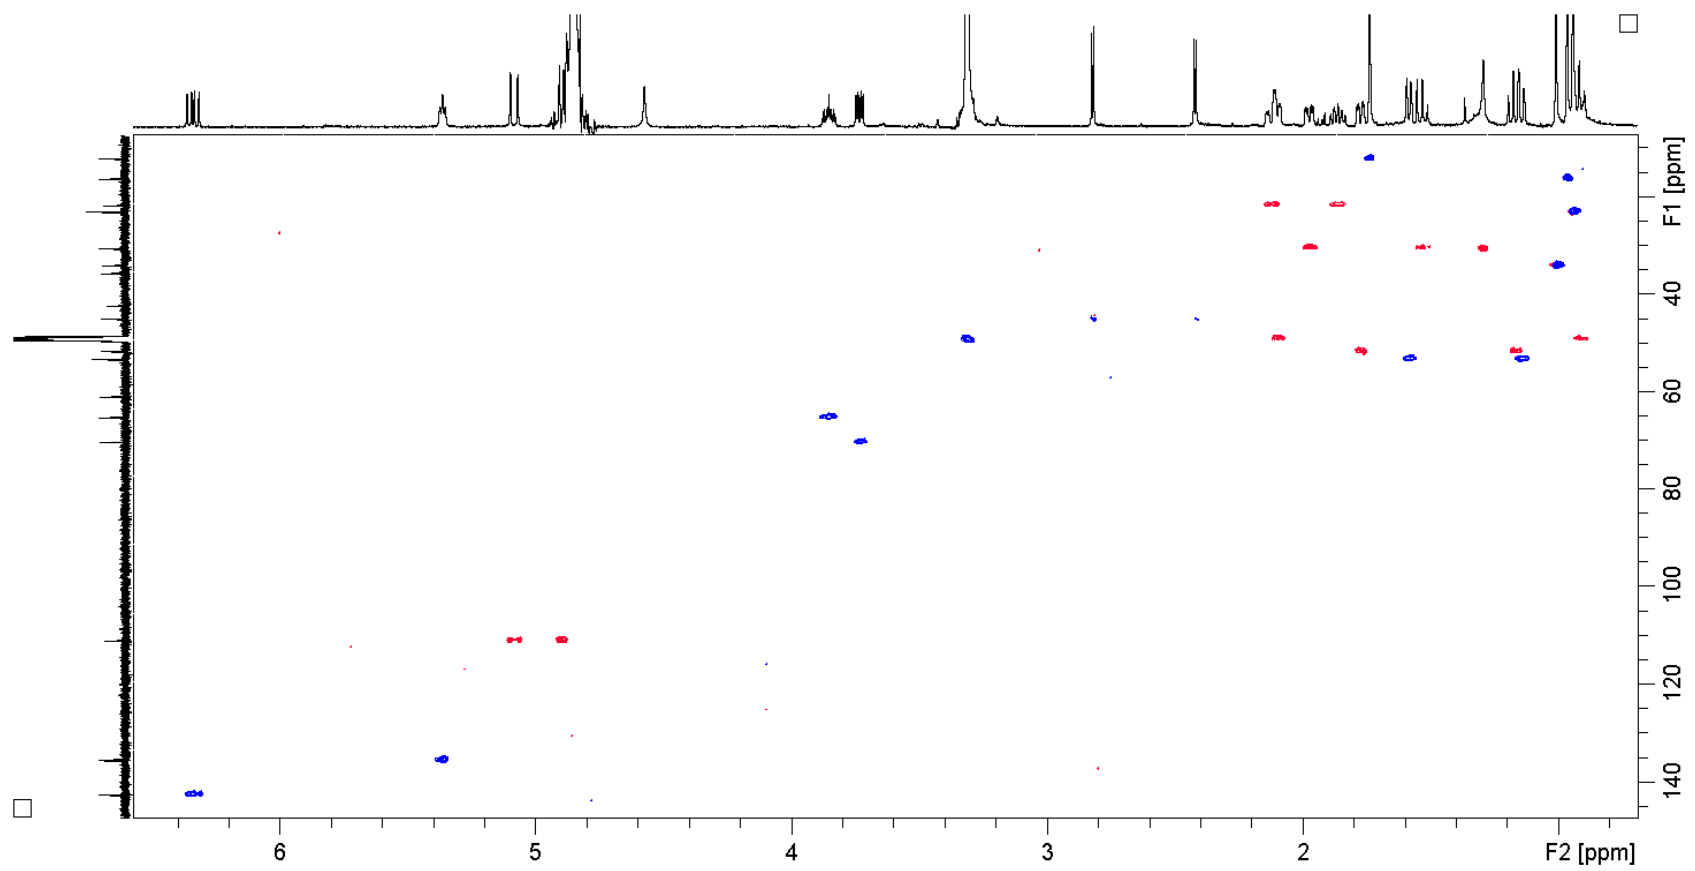

**Figure S48.** HSQC NMR spectrum of **5** (CD<sub>3</sub>OD).

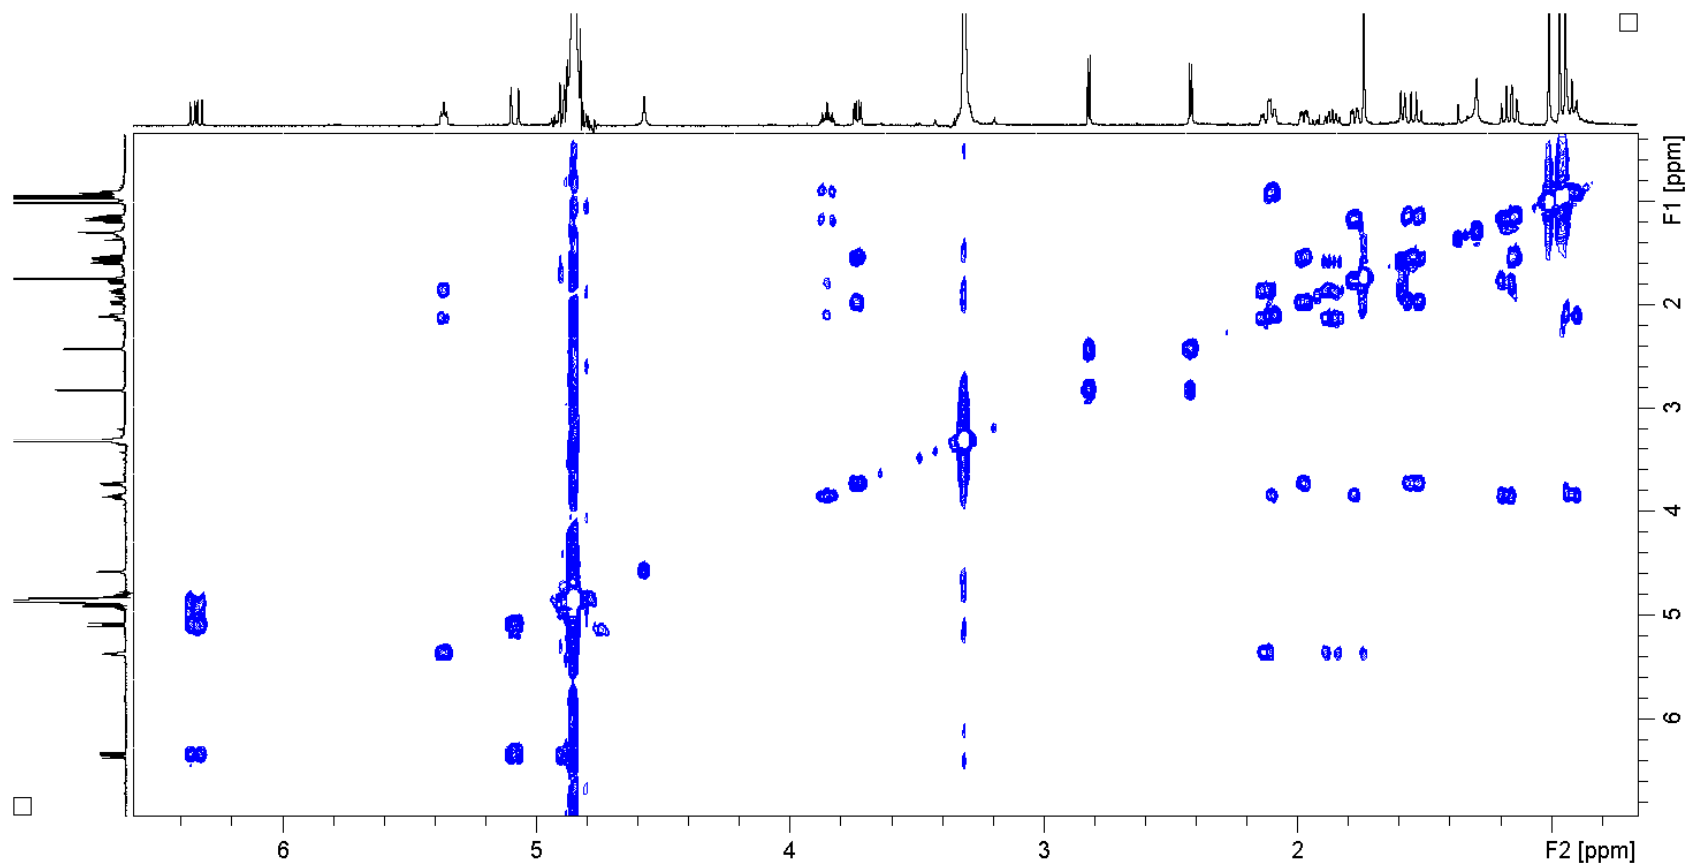

**Figure S49.**  $^1\text{H}$ - $^1\text{H}$  COSY NMR spectrum of **5** ( $\text{CD}_3\text{OD}$ ).

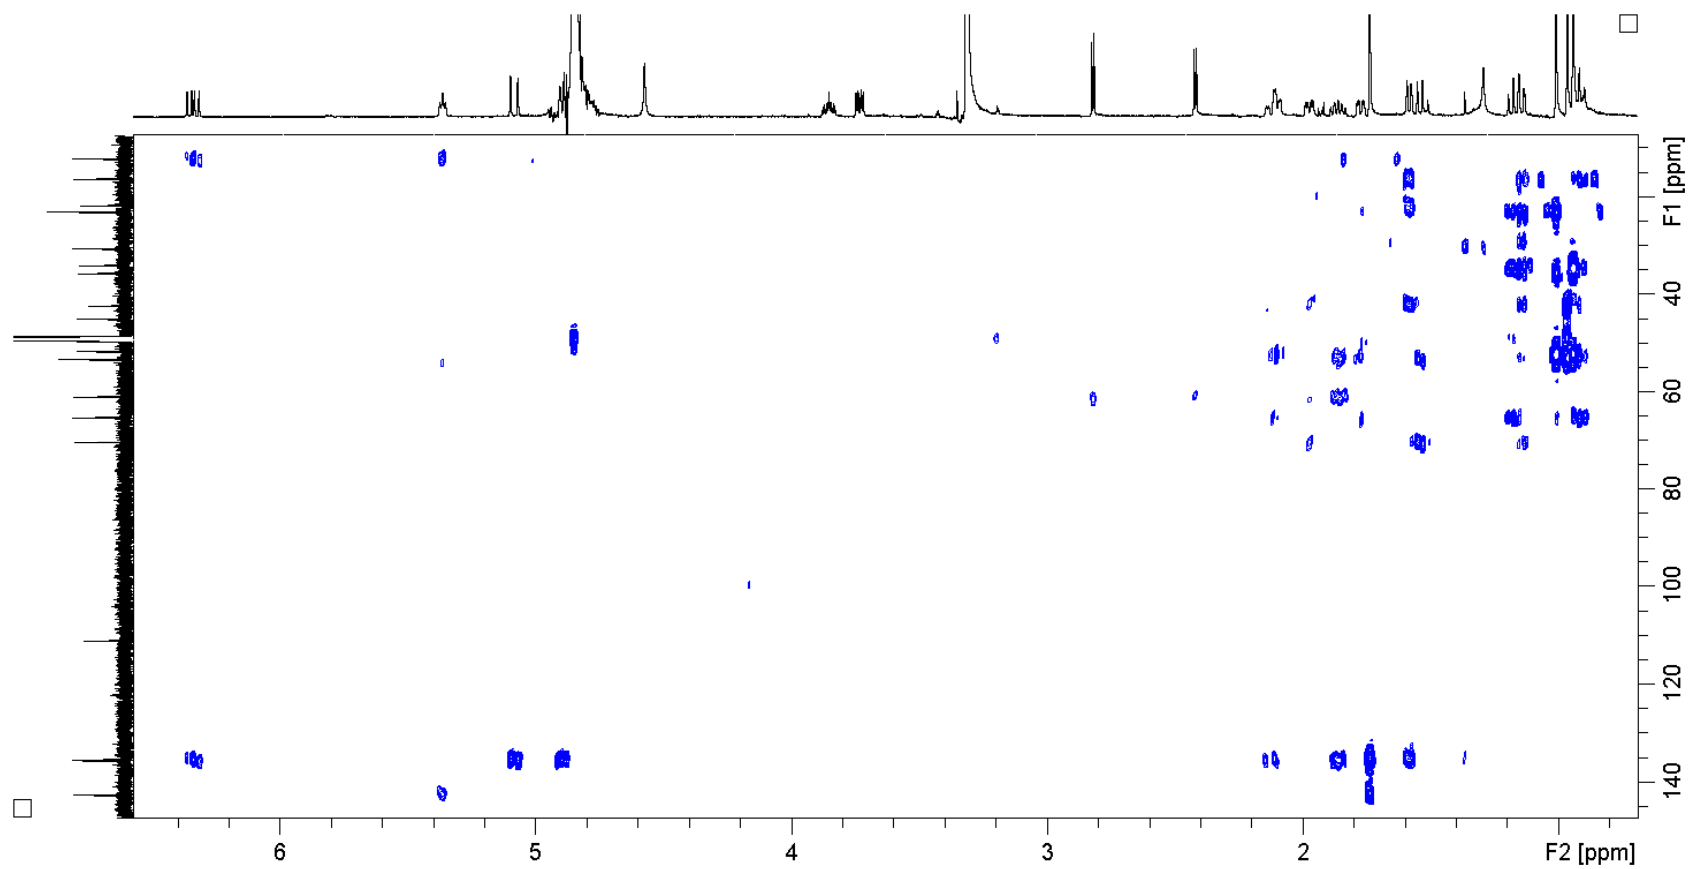

**Figure S50.** HMBC NMR spectrum of **5** (CD<sub>3</sub>OD).

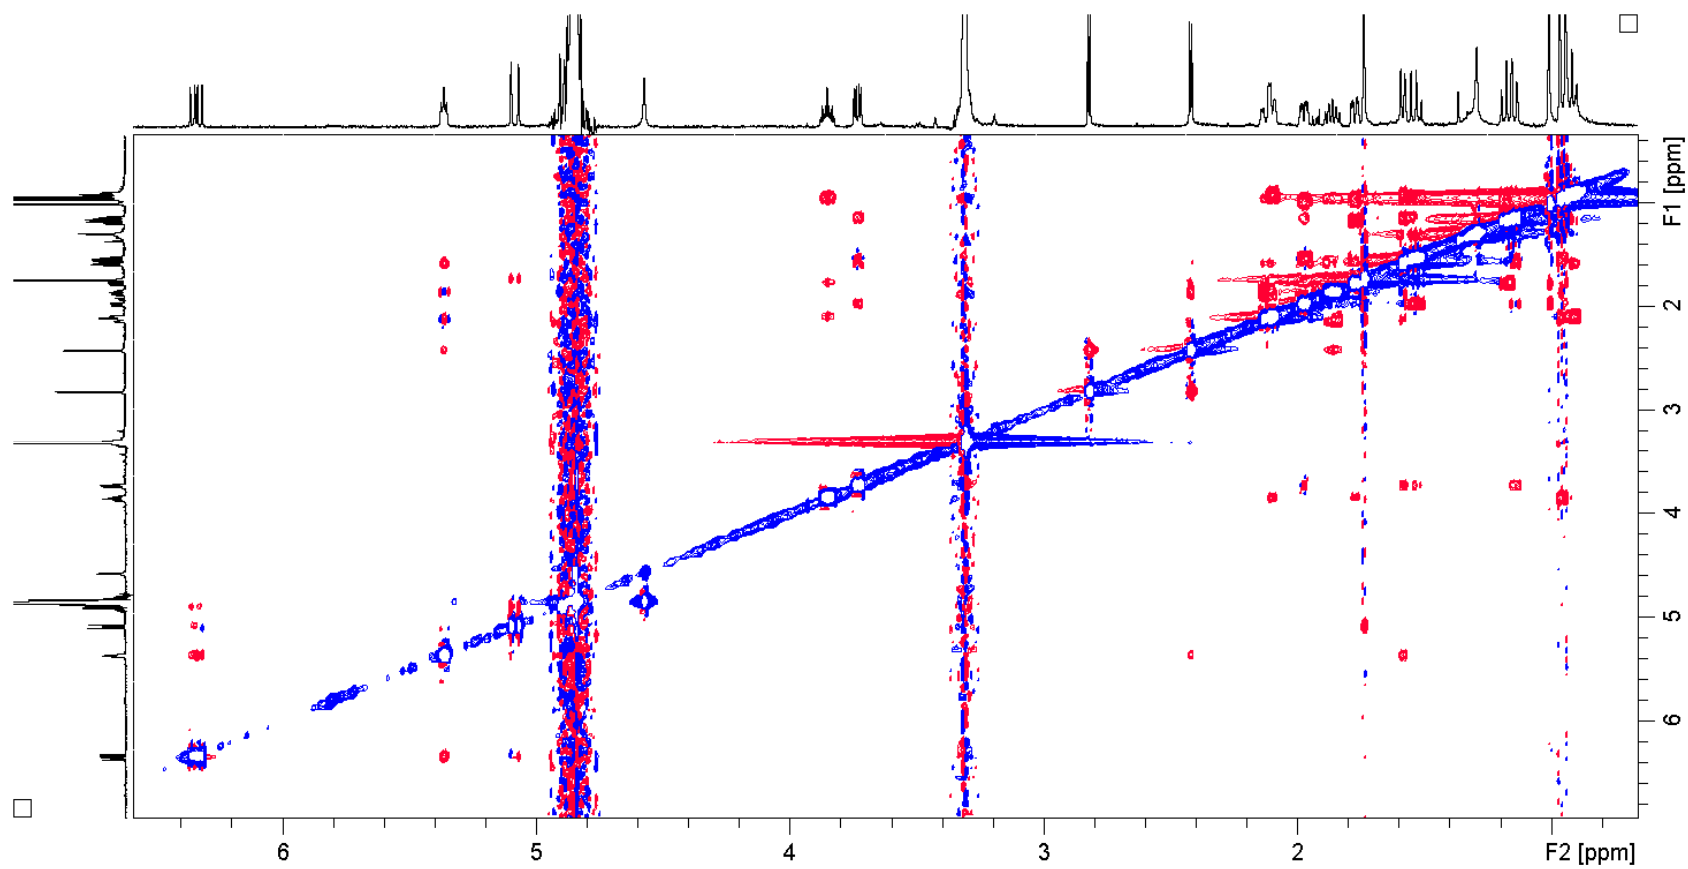

**Figure S51.** NOESY NMR spectrum of **5** (CD<sub>3</sub>OD).

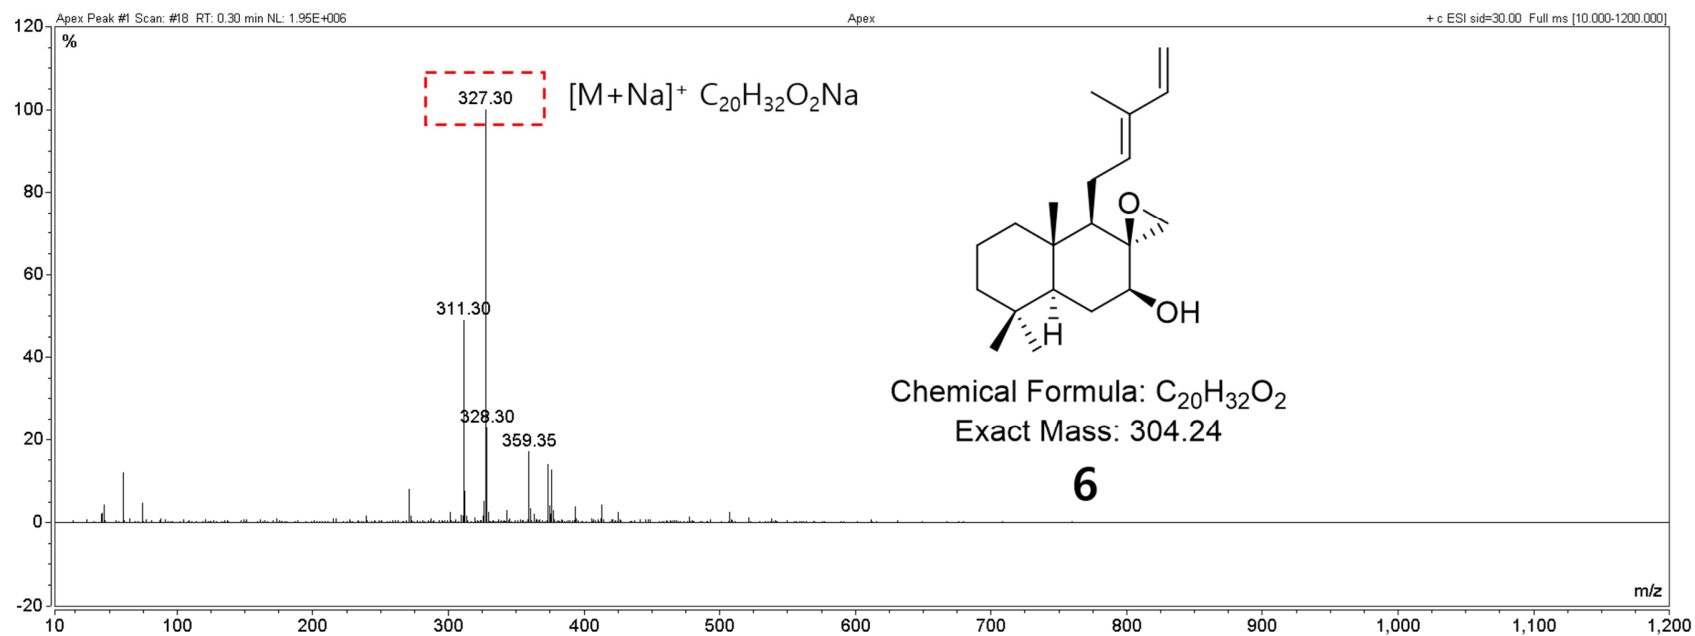

**Figure S52.** LRESIMS data of **6**.

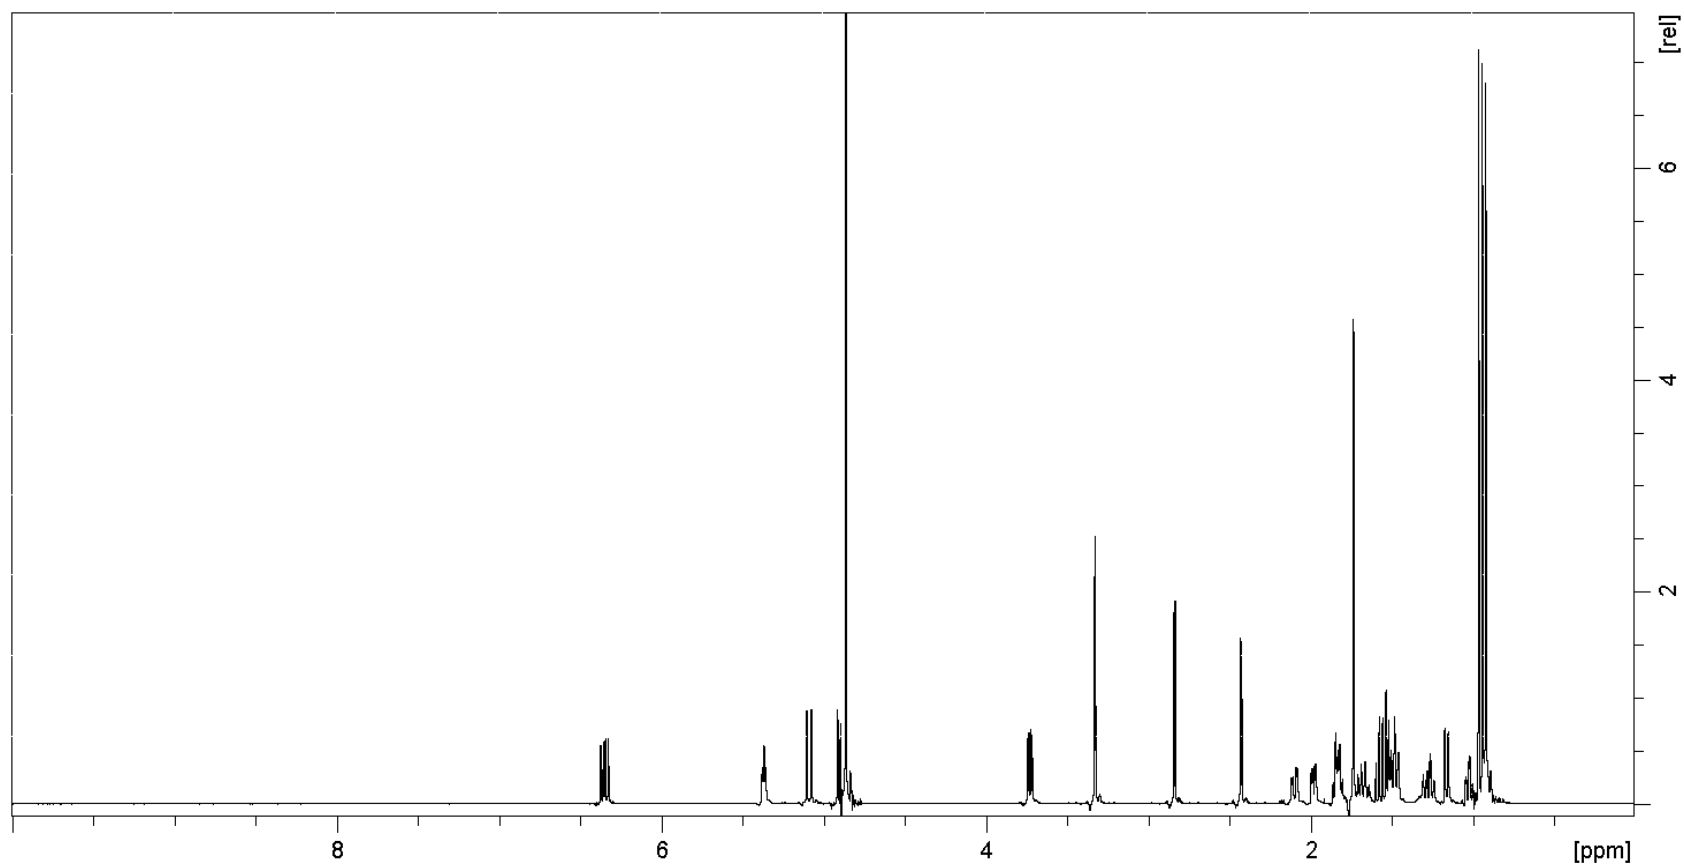

**Figure S53.**  $^1\text{H}$  NMR spectrum of **6** ( $\text{CD}_3\text{OD}$ ).

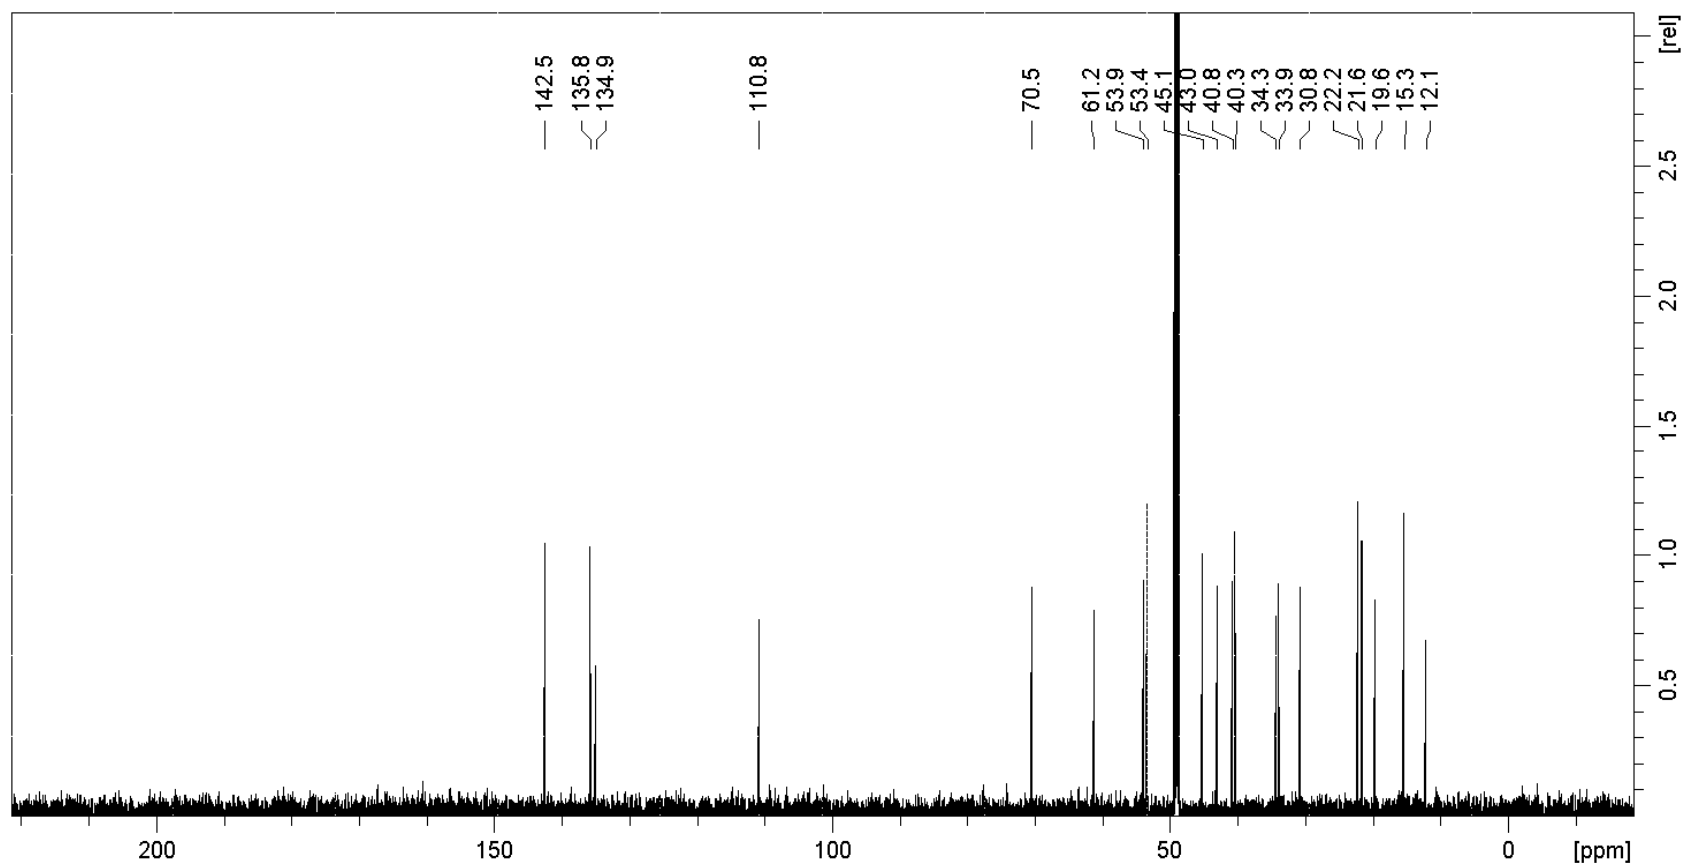

**Figure S54.** <sup>13</sup>C NMR spectrum of **6** (CD<sub>3</sub>OD).



|           |           |     |       |     |        |     |             |     |  |  |             |        |     |        |     |        |     |             |     |
|-----------|-----------|-----|-------|-----|--------|-----|-------------|-----|--|--|-------------|--------|-----|--------|-----|--------|-----|-------------|-----|
| HL-60     | 1         |     | 2     |     | 4      |     | Doxorubicin |     |  |  | Raji        | 1      |     | 2      |     | 4      |     | Doxorubicin |     |
| (μM)      | MEAN      | SD  | MEAN  | SD  | MEAN   | SD  | MEAN        | SD  |  |  | (μM)        | MEAN   | SD  | MEAN   | SD  | MEAN   | SD  | MEAN        | SD  |
| 0.1       | 97.7      | 1.9 | 80.0  | 3.0 | 93.3   | 1.3 | 1.6         | 0.2 |  |  | 0.1         | 27.4   | 2.6 | 0.1    | 0.1 | 30.1   | 6.4 | 0.8         | 0.2 |
| 0.03      | 102.6     | 2.8 | 95.1  | 0.7 | 92.2   | 2.1 | 30.0        | 3.3 |  |  | 0.03        | 67.7   | 5.5 | 10.1   | 5.3 | 73.6   | 8.6 | 22.0        | 2.5 |
| 0.01      | 99.6      | 1.6 | 99.1  | 4.3 | 94.9   | 2.4 | 75.2        | 3.6 |  |  | 0.01        | 86.5   | 7.4 | 64.5   | 7.3 | 79.1   | 9.3 | 52.5        | 1.2 |
| 0.003     | 96.8      | 1.9 | 98.5  | 2.6 | 94.7   | 2.1 | 90.5        | 4.6 |  |  | 0.003       | 92.9   | 7.5 | 79.3   | 6.5 | 92.5   | 4.0 | 85.7        | 3.2 |
| 0.001     | 94.6      | 2.4 | 96.2  | 1.1 | 84.6   | 4.2 | 85.8        | 2.7 |  |  | 0.001       | 102.4  | 6.4 | 82.4   | 8.0 | 94.3   | 8.2 | 88.9        | 9.9 |
| IC50      | >30       |     | >30   |     | >30    |     | 0.018       |     |  |  | IC50        | 15.520 |     | 3.406  |     | 17.110 |     | 0.011       |     |
|           |           |     |       |     |        |     |             |     |  |  |             |        |     |        |     |        |     |             |     |
| WSU-DLCL2 | 1         |     | 2     |     | 4      |     | Doxorubicin |     |  |  | NALM6 C. G5 | 1      |     | 2      |     | 4      |     | Doxorubicin |     |
| (μM)      | MEAN      | SD  | MEAN  | SD  | MEAN   | SD  | MEAN        | SD  |  |  | (μM)        | MEAN   | SD  | MEAN   | SD  | MEAN   | SD  | MEAN        | SD  |
| 0.1       | 50.5      | 4.8 | 0.0   | 0.0 | 8.1    | 2.8 | 0.4         | 0.1 |  |  | 0.1         | 86.3   | 5.2 | 39.3   | 5.7 | 100.2  | 7.6 | 0.1         | 0.0 |
| 0.03      | 85.0      | 4.0 | 8.7   | 2.6 | 75.2   | 4.0 | 4.0         | 0.8 |  |  | 0.03        | 91.9   | 3.3 | 77.7   | 4.1 | 91.9   | 4.1 | -0.1        | 0.0 |
| 0.01      | 93.7      | 6.0 | 43.1  | 7.8 | 82.1   | 8.0 | 20.9        | 0.6 |  |  | 0.01        | 102.8  | 2.3 | 88.6   | 1.8 | 94.3   | 5.9 | 2.5         | 1.1 |
| 0.003     | 100.1     | 6.4 | 56.4  | 3.7 | 89.2   | 3.9 | 90.1        | 8.9 |  |  | 0.003       | 110.6  | 0.6 | 99.5   | 2.8 | 96.0   | 4.9 | 64.0        | 4.7 |
| 0.001     | 101.2     | 7.7 | 66.5  | 8.0 | 92.1   | 3.6 | 94.8        | 8.4 |  |  | 0.001       | 99.8   | 3.9 | 107.0  | 2.6 | 87.4   | 6.2 | 82.8        | 6.8 |
| IC50      | >30(30.7) |     | 1.182 |     | 14.170 |     | 0.006       |     |  |  | IC50        | >30    |     | 22.460 |     | >30    |     | 0.003       |     |
|           |           |     |       |     |        |     |             |     |  |  |             |        |     |        |     |        |     |             |     |
| K562      | 1         |     | 2     |     | 4      |     | Doxorubicin |     |  |  | RPMI-8402   | 1      |     | 2      |     | 4      |     | Doxorubicin |     |
| (μM)      | MEAN      | SD  | MEAN  | SD  | MEAN   | SD  | MEAN        | SD  |  |  | (μM)        | MEAN   | SD  | MEAN   | SD  | MEAN   | SD  | MEAN        | SD  |
| 0.1       | 86.2      | 1.6 | 53.4  | 2.2 | 97.7   | 1.2 | 3.8         | 0.1 |  |  | 0.1         | 83.3   | 3.4 | 56.3   | 6.8 | 91.9   | 4.4 | 1.2         | 0.4 |
| 0.03      | 96.9      | 1.8 | 84.3  | 2.8 | 86.8   | 4.6 | 4.6         | 0.9 |  |  | 0.03        | 86.2   | 3.9 | 74.0   | 6.1 | 85.9   | 4.2 | 13.5        | 0.6 |
| 0.01      | 109.8     | 5.2 | 98.4  | 3.9 | 91.6   | 2.6 | 31.4        | 1.3 |  |  | 0.01        | 84.5   | 5.5 | 91.5   | 6.6 | 82.3   | 5.4 | 58.1        | 5.3 |
| 0.003     | 113.3     | 3.4 | 109.7 | 3.0 | 99.1   | 0.7 | 56.9        | 2.5 |  |  | 0.003       | 96.3   | 4.5 | 94.9   | 8.8 | 80.6   | 8.4 | 68.7        | 5.2 |
| 0.001     | 114.0     | 2.6 | 114.3 | 1.1 | 98.8   | 1.5 | 65.7        | 4.3 |  |  | 0.001       | 104.4  | 6.4 | 94.3   | 4.6 | 85.2   | 6.8 | 77.2        | 2.0 |
| IC50      | >30       |     | >30   |     | >30    |     | 0.003       |     |  |  | IC50        | >30    |     | >30    |     | >30    |     | 0.008       |     |
|           |           |     |       |     |        |     |             |     |  |  |             |        |     |        |     |        |     |             |     |
| U266      | 1         |     | 2     |     | 4      |     | Doxorubicin |     |  |  | RPMI-1788   | 1      |     | 2      |     | 4      |     | Doxorubicin |     |
| (μM)      | MEAN      | SD  | MEAN  | SD  | MEAN   | SD  | MEAN        | SD  |  |  | (μM)        | MEAN   | SD  | MEAN   | SD  | MEAN   | SD  | MEAN        | SD  |
| 0.1       | 101.0     | 4.2 | 83.6  | 1.6 | 99.0   | 7.8 | 17.2        | 1.4 |  |  | 0.1         | 89.9   | 4.9 | 60.9   | 4.1 | 97.2   | 9.2 | 3.2         | 0.4 |
| 0.03      | 96.3      | 3.3 | 92.7  | 5.4 | 89.3   | 4.5 | 68.1        | 4.2 |  |  | 0.03        | 95.2   | 1.4 | 88.3   | 4.6 | 92.1   | 6.0 | 14.0        | 0.9 |
| 0.01      | 99.2      | 4.1 | 96.4  | 1.9 | 92.8   | 4.0 | 84.4        | 3.5 |  |  | 0.01        | 99.1   | 5.0 | 94.2   | 1.2 | 96.0   | 4.0 | 38.6        | 6.0 |
| 0.003     | 100.3     | 2.0 | 100.1 | 4.5 | 93.4   | 4.5 | 88.9        | 4.4 |  |  | 0.003       | 99.0   | 2.2 | 94.0   | 1.7 | 94.5   | 3.1 | 85.7        | 5.0 |
| 0.001     | 97.5      | 4.6 | 97.7  | 2.8 | 90.6   | 1.9 | 86.8        | 4.5 |  |  | 0.001       | 96.1   | 1.8 | 96.6   | 7.2 | 89.4   | 2.6 | 99.9        | 2.8 |
| IC50      | >30       |     | >30   |     | >30    |     | 0.042       |     |  |  | IC50        | >30    |     | >30    |     | >30    |     | 0.008       |     |

| ACHN       | 1      |      | 2      |      | 4     |      | Adriamycin |        |      |
|------------|--------|------|--------|------|-------|------|------------|--------|------|
| (μM)       | MEAN   | SD   | MEAN   | SD   | MEAN  | SD   | (uM)       | MEAN   | SD   |
| 30         | 72.06  | 6.94 | 72.00  | 5.82 | 81.94 | 4.42 | 3          | -13.42 | 2.41 |
| 10         | 74.24  | 5.77 | 83.14  | 6.51 | 85.65 | 5.73 | 1          | -4.90  | 6.19 |
| 3          | 86.68  | 7.11 | 89.39  | 2.48 | 90.98 | 5.35 | 0.3        | 12.82  | 5.58 |
| 1          | 87.08  | 6.98 | 93.12  | 5.49 | 95.41 | 6.17 | 0.1        | 30.04  | 2.04 |
| 0.3        | 94.02  | 3.03 | 99.14  | 3.93 | 98.72 | 1.13 | 0.03       | 92.15  | 7.02 |
| GI50       | >30    |      | >30    |      | >30   |      | GI50       | 0.074  |      |
|            |        |      |        |      |       |      |            |        |      |
| PC-3       | 1      |      | 2      |      | 4     |      | Adriamycin |        |      |
| (μM)       | MEAN   | SD   | MEAN   | SD   | MEAN  | SD   | (uM)       | MEAN   | SD   |
| 30         | 85.23  | 6.01 | 80.76  | 5.23 | 71.11 | 1.31 | 3          | -10.58 | 3.74 |
| 10         | 86.14  | 3.39 | 82.94  | 7.49 | 76.59 | 7.90 | 1          | -7.86  | 1.71 |
| 3          | 90.37  | 2.47 | 89.14  | 4.34 | 87.52 | 6.75 | 0.3        | 16.13  | 9.96 |
| 1          | 94.14  | 3.81 | 91.13  | 2.52 | 93.34 | 2.66 | 0.1        | 27.40  | 3.53 |
| 0.3        | 98.40  | 3.16 | 96.25  | 4.32 | 98.22 | 3.40 | 0.03       | 95.10  | 7.57 |
| GI50       | >30    |      | >30    |      | >30   |      | GI50       | 0.073  |      |
|            |        |      |        |      |       |      |            |        |      |
| NCI-H23    | 1      |      | 2      |      | 4     |      | Adriamycin |        |      |
| (μM)       | MEAN   | SD   | MEAN   | SD   | MEAN  | SD   | (uM)       | MEAN   | SD   |
| 30         | 73.68  | 5.34 | 72.20  | 6.69 | 78.62 | 7.31 | 3          | -9.73  | 5.18 |
| 10         | 83.08  | 4.95 | 87.93  | 2.40 | 89.75 | 5.63 | 1          | -6.45  | 2.12 |
| 3          | 87.02  | 4.74 | 88.07  | 0.81 | 90.41 | 3.68 | 0.3        | 16.90  | 8.45 |
| 1          | 95.45  | 7.56 | 96.23  | 4.02 | 92.36 | 6.61 | 0.1        | 27.58  | 2.13 |
| 0.3        | 100.36 | 2.31 | 98.57  | 6.77 | 94.13 | 5.84 | 0.03       | 96.57  | 7.31 |
| GI50       | >30    |      | >30    |      | >30   |      | GI50       | 0.074  |      |
|            |        |      |        |      |       |      |            |        |      |
| MRC-9      | 1      |      | 2      |      | 4     |      | Adriamycin |        |      |
| (μM)       | MEAN   | SD   | MEAN   | SD   | MEAN  | SD   | (uM)       | MEAN   | SD   |
| 30         | 80.62  | 6.81 | 85.72  | 3.97 | 74.81 | 8.01 | 3          | -7.72  | 3.86 |
| 10         | 85.93  | 4.24 | 88.22  | 5.74 | 89.10 | 4.65 | 1          | -4.38  | 3.80 |
| 3          | 88.28  | 5.42 | 90.65  | 5.28 | 91.80 | 7.86 | 0.3        | 19.26  | 6.64 |
| 1          | 97.15  | 4.12 | 95.54  | 4.32 | 93.31 | 3.99 | 0.1        | 39.69  | 8.11 |
| 0.3        | 100.00 | 1.62 | 97.15  | 5.80 | 96.06 | 3.46 | 0.03       | 94.36  | 4.23 |
| GI50       | >30    |      | >30    |      | >30   |      | GI50       | 0.090  |      |
|            |        |      |        |      |       |      |            |        |      |
| MDA-MB-231 | 1      |      | 2      |      | 4     |      | Adriamycin |        |      |
| (μM)       | MEAN   | SD   | MEAN   | SD   | MEAN  | SD   | (uM)       | MEAN   | SD   |
| 30         | 77.94  | 4.06 | 72.56  | 4.31 | 81.81 | 6.11 | 3          | -11.01 | 7.44 |
| 10         | 80.43  | 2.07 | 77.83  | 4.53 | 88.19 | 7.42 | 1          | -2.06  | 4.27 |
| 3          | 83.87  | 5.13 | 85.05  | 6.12 | 89.22 | 5.68 | 0.3        | 11.59  | 7.77 |
| 1          | 91.94  | 4.20 | 96.03  | 4.16 | 95.73 | 4.98 | 0.1        | 30.89  | 5.00 |
| 0.3        | 96.84  | 3.50 | 98.84  | 4.00 | 98.22 | 4.02 | 0.03       | 94.68  | 5.94 |
| GI50       | >30    |      | >30    |      | >30   |      | GI50       | 0.076  |      |
|            |        |      |        |      |       |      |            |        |      |
| NUGC-3     | 1      |      | 2      |      | 4     |      | Adriamycin |        |      |
| (μM)       | MEAN   | SD   | MEAN   | SD   | MEAN  | SD   | (uM)       | MEAN   | SD   |
| 30         | 75.75  | 6.55 | 76.07  | 2.78 | 71.34 | 4.23 | 3          | -10.63 | 2.56 |
| 10         | 79.27  | 9.65 | 82.67  | 5.34 | 78.68 | 0.19 | 1          | -5.42  | 8.59 |
| 3          | 85.43  | 7.30 | 88.71  | 6.11 | 89.75 | 6.00 | 0.3        | 18.29  | 9.25 |
| 1          | 92.73  | 2.49 | 92.48  | 6.47 | 93.55 | 5.00 | 0.1        | 43.64  | 7.94 |
| 0.3        | 94.27  | 2.49 | 98.26  | 4.35 | 97.32 | 2.77 | 0.03       | 93.91  | 5.80 |
| GI50       | >30    |      | >30    |      | >30   |      | GI50       | 0.095  |      |
|            |        |      |        |      |       |      |            |        |      |
| HCT-15     | 1      |      | 2      |      | 4     |      | Adriamycin |        |      |
| (μM)       | MEAN   | SD   | MEAN   | SD   | MEAN  | SD   | (uM)       | MEAN   | SD   |
| 30         | 75.84  | 8.94 | 77.84  | 4.60 | 75.49 | 6.52 | 3          | -7.03  | 2.43 |
| 10         | 82.36  | 5.39 | 88.67  | 3.30 | 81.85 | 7.82 | 1          | -3.82  | 3.78 |
| 3          | 84.01  | 6.82 | 91.35  | 2.47 | 84.38 | 0.68 | 0.3        | 19.05  | 4.66 |
| 1          | 90.80  | 0.61 | 92.46  | 3.51 | 96.86 | 1.49 | 0.1        | 35.19  | 2.10 |
| 0.3        | 96.50  | 3.57 | 100.50 | 4.90 | 98.37 | 4.05 | 0.03       | 98.35  | 3.87 |
| GI50       | >30    |      | >30    |      | >30   |      | GI50       | 0.084  |      |
|            |        |      |        |      |       |      |            |        |      |

**Table S1.** Results of the cytotoxicity test of 1, 2, and 4.
